# Supplementary material
Source: Royal Society of Chemistry journal article supplement (doi:10.1039/d5nr04812e)
Supplement: d5nr04812e1.xlsx [file d5nr04812e1.xlsx]

## Sheet: Hoja1
	GO	rGO
199.832	0.03681	-0.00809
200.796	0.03121	-0.00684
201.76	0.02604	-0.00566
202.725	0.0213	-0.00453
203.689	0.01699	-0.00347
204.653	0.01312	-0.00246
205.617	0.00968	-0.00152
206.581	0.00668	-0.000639603
207.546	0.0041	0.00018112
208.51	0.00196	0.000940945
209.474	0.000256581	0.00164
210.438	-0.000620881	0.00289
211.403	-0.00107	0.00401
212.367	-0.000874452	0.00477
213.331	0.000400961	0.00461
214.295	0.00219	0.00359
215.26	0.00345	0.00215
216.224	0.00337	0.000803723
217.188	0.00225	-0.000236352
218.152	0.00121	-0.000970548
219.116	0.000827218	-0.00159
220.081	0.000982167	-0.00213
221.045	0.00159	-0.00231
222.009	0.00245	-0.00201
222.973	0.00306	-0.00132
223.938	0.00263	-0.000528014
224.902	0.0012	0.000421876
225.866	-0.000171155	0.0022
226.83	-0.000693686	0.005
227.795	-0.000578274	0.00827
228.759	-0.000630882	0.01122
229.723	-0.00133	0.01334
230.687	-0.00237	0.01428
231.652	-0.00311	0.01372
232.616	-0.00359	0.01189
233.58	-0.00456	0.00992
234.544	-0.0063	0.00865
235.508	-0.0084	0.00829
236.473	-0.00995	0.00855
237.437	-0.01048	0.0094
238.401	-0.01001	0.01078
239.365	-0.00874	0.01267
240.33	-0.0068	0.01488
241.294	-0.00474	0.01699
242.258	-0.00327	0.01863
243.222	-0.00257	0.01963
244.187	-0.0017	0.02049
245.151	0.000133376	0.02165
246.115	0.00261	0.02297
247.079	0.00485	0.02395
248.043	0.00625	0.02423
249.008	0.00685	0.02387
249.972	0.00686	0.02312
250.936	0.00626	0.02247
251.9	0.00507	0.02194
252.865	0.00329	0.02157
253.829	0.00103	0.02137
254.793	-0.00151	0.02135
255.757	-0.00409	0.02151
256.722	-0.00645	0.02179
257.686	-0.00822	0.02211
258.65	-0.0094	0.0229
259.614	-0.01001	0.0236
260.579	-0.01011	0.02353
261.543	-0.00977	0.02236
262.507	-0.00907	0.02033
263.471	-0.00795	0.01824
264.435	-0.00644	0.01656
265.4	-0.00499	0.01532
266.364	-0.00436	0.01463
267.328	-0.0044	0.01439
268.292	-0.00465	0.0144
269.257	-0.00468	0.01441
270.221	-0.00428	0.01435
271.185	-0.00318	0.01409
272.149	-0.0012	0.01401
273.114	0.0012	0.01399
274.078	0.0032	0.01365
275.042	0.00443	0.01284
276.006	0.00506	0.01184
276.97	0.0054	0.01108
277.935	0.00561	0.01044
278.899	0.00577	0.00887
279.863	0.00587	0.00624
280.827	0.0059	0.00318
281.792	0.00603	0.000662808
282.756	0.00652	-0.0006395
283.72	0.00635	-0.00101
284.684	0.00394	-0.00105
285.649	-0.000676916	-0.00105
286.613	-0.00541	-0.00132
287.577	-0.00851	-0.00189
288.541	-0.0093	-0.00245
289.506	-0.0085	-0.00241
290.47	-0.00694	-0.00121
291.434	-0.00493	0.000625265
292.398	-0.00301	0.00201
293.362	-0.00153	0.00253
294.327	-0.000307713	0.00264
295.291	0.000829686	0.00309
296.255	0.00177	0.00425
297.219	0.00219	0.00564
298.184	0.00177	0.00694
299.148	0.000825994	0.00804
300.112	-0.000189569	0.00888
301.076	-0.0011	0.00935
302.041	-0.00229	0.0093
303.005	-0.00474	0.00838
303.969	-0.00828	0.00658
304.933	-0.01205	0.00441
305.898	-0.01556	0.00257
306.862	-0.01842	0.00114
307.826	-0.02056	-9.99885e-05
308.79	-0.02206	-0.0014
309.754	-0.02278	-0.00269
310.719	-0.02266	-0.0039
311.683	-0.02213	-0.00473
312.647	-0.02125	-0.00507
313.611	-0.01981	-0.00496
314.576	-0.01783	-0.00451
315.54	-0.01588	-0.00388
316.504	-0.01461	-0.00351
317.468	-0.01404	-0.00344
318.433	-0.01354	-0.00378
319.397	-0.01278	-0.00458
320.361	-0.01204	-0.00582
321.325	-0.01186	-0.00738
322.289	-0.01282	-0.00921
323.254	-0.01481	-0.01091
324.218	-0.01804	-0.01213
325.182	-0.02209	-0.0127
326.146	-0.02573	-0.01294
327.111	-0.02827	-0.01296
328.075	-0.02972	-0.0127
329.039	-0.03076	-0.0121
330.003	-0.03194	-0.01139
330.968	-0.03268	-0.01052
331.932	-0.03204	-0.00955
332.896	-0.02994	-0.0086
333.86	-0.02726	-0.00772
334.825	-0.02511	-0.00707
335.789	-0.02376	-0.00688
336.753	-0.02253	-0.00711
337.717	-0.021	-0.00781
338.681	-0.01936	-0.00874
339.646	-0.01796	-0.00966
340.61	-0.01691	-0.01022
341.574	-0.01608	-0.00987
342.538	-0.01509	-0.00781
343.503	-0.01387	-0.00404
344.467	-0.01203	0.000744281
345.431	-0.00921	0.00584
346.395	-0.00571	0.01073
347.36	-0.00242	0.01506
348.324	-0.000133816	0.01866
349.288	0.0014	0.02099
350.252	0.00298	0.02166
351.216	0.00454	0.02064
352.181	0.00524	0.01857
353.145	0.00432	0.0163
354.109	0.00166	0.01416
355.073	-0.00192	0.01147
356.038	-0.00547	0.00743
357.002	-0.00886	0.00274
357.966	-0.01192	-0.00149
358.93	-0.01457	-0.00463
359.895	-0.01709	-0.00653
360.859	-0.0199	-0.00726
361.823	-0.02294	-0.00701
362.787	-0.02489	-0.0062
363.752	-0.02457	-0.00547
364.716	-0.02249	-0.00479
365.68	-0.01996	-0.00392
366.644	-0.01787	-0.00276
367.608	-0.01601	-0.00165
368.573	-0.01357	-0.00125
369.537	-0.01051	-0.00154
370.501	-0.00746	-0.00148
371.465	-0.00493	-0.000268758
372.43	-0.00306	0.00196
373.394	-0.00172	0.00431
374.358	-0.000631195	0.00582
375.322	0.00033956	0.00638
376.287	0.000997216	0.00687
377.251	0.00139	0.00729
378.215	0.0015	0.00744
379.179	0.00138	0.00718
380.143	0.0012	0.00664
381.108	0.00121	0.00634
382.072	0.00181	0.00734
383.036	0.00277	0.00871
384	0.00312	0.00938
384.965	0.00266	0.00912
385.929	0.0018	0.00858
386.893	0.00108	0.00873
387.857	0.000802931	0.01003
388.822	0.00123	0.0117
389.786	0.00266	0.01301
390.75	0.00456	0.01406
391.714	0.00598	0.01536
392.679	0.00648	0.01721
393.643	0.00665	0.01929
394.607	0.00744	0.02095
395.571	0.00905	0.02183
396.535	0.01107	0.02178
397.5	0.01312	0.02074
398.464	0.01484	0.01928
399.428	0.0159	0.01862
400.392	0.01597	0.01991
401.357	0.01523	0.02243
402.321	0.014	0.02443
403.285	0.01254	0.02532
404.249	0.01134	0.02543
405.214	0.01089	0.02519
406.178	0.01128	0.02481
407.142	0.01217	0.02429
408.106	0.01316	0.0233
409.07	0.01428	0.02218
410.035	0.01494	0.02166
410.999	0.01512	0.02174
411.963	0.01556	0.02176
412.927	0.01717	0.02079
413.892	0.0199	0.01872
414.856	0.02265	0.01615
415.82	0.02453	0.01365
416.784	0.02562	0.01147
417.749	0.02649	0.00999
418.713	0.02758	0.00954
419.677	0.02853	0.01039
420.641	0.02877	0.01193
421.606	0.02864	0.01375
422.57	0.02912	0.01489
423.534	0.03074	0.01474
424.498	0.03294	0.01345
425.462	0.03431	0.01176
426.427	0.03355	0.01036
427.391	0.03167	0.0095
428.355	0.03018	0.00937
429.319	0.02928	0.00968
430.284	0.02887	0.0097
431.248	0.02877	0.00895
432.212	0.02874	0.00754
433.176	0.02821	0.00621
434.141	0.02689	0.00555
435.105	0.02533	0.00567
436.069	0.02441	0.00635
437.033	0.02432	0.00739
437.998	0.0243	0.00867
438.962	0.02326	0.01039
439.926	0.0218	0.01246
440.89	0.02146	0.01422
441.854	0.02279	0.01539
442.819	0.02494	0.01611
443.783	0.02663	0.01666
444.747	0.02707	0.01719
445.711	0.02646	0.01769
446.676	0.02575	0.01829
447.64	0.02518	0.01888
448.604	0.02451	0.01902
449.568	0.02366	0.01854
450.533	0.02256	0.01757
451.497	0.02118	0.01647
452.461	0.01952	0.01537
453.425	0.01757	0.01406
454.389	0.01544	0.01249
455.354	0.01359	0.0109
456.318	0.01255	0.0095
457.282	0.01274	0.00841
458.246	0.01337	0.0071
459.211	0.01414	0.00505
460.175	0.0149	0.00241
461.139	0.01534	-0.000164687
462.103	0.0152	-0.00219
463.068	0.01456	-0.00369
464.032	0.01391	-0.00512
464.996	0.01385	-0.00677
465.96	0.01375	-0.00821
466.925	0.01318	-0.00911
467.889	0.01228	-0.00925
468.853	0.01135	-0.00852
469.817	0.01058	-0.00693
470.781	0.01	-0.00469
471.746	0.00958	-0.00224
472.71	0.00928	3.41886e-05
473.674	0.00924	0.00208
474.638	0.00992	0.00429
475.603	0.01145	0.00674
476.567	0.01335	0.00901
477.531	0.01437	0.01028
478.495	0.0143	0.01018
479.46	0.0139	0.009
480.424	0.01342	0.00724
481.388	0.01276	0.00531
482.352	0.01177	0.00348
483.316	0.01051	0.00184
484.281	0.00882	0.000268028
485.245	0.00578	-0.001
486.209	0.00204	-0.00153
487.173	-0.000751159	-0.000526795
488.138	-0.00204	0.00196
489.102	-0.00227	0.00498
490.066	-0.00224	0.00721
491.03	-0.00211	0.00855
491.995	-0.00163	0.00949
492.959	-0.00082588	0.01024
493.923	-5.77097e-05	0.01061
494.887	0.000289879	0.01036
495.852	6.72305e-05	0.00942
496.816	-6.10298e-05	0.00791
497.78	0.000417778	0.00576
498.744	0.00124	0.00309
499.708	0.00173	0.000379323
500.673	0.00132	-0.00181
501.637	-0.000126281	-0.00299
502.601	-0.00239	-0.00285
503.565	-0.00504	-0.00169
504.53	-0.00757	-4.15307e-05
505.494	-0.00926	0.00208
506.458	-0.00999	0.00439
507.422	-0.01039	0.00593
508.387	-0.01108	0.00587
509.351	-0.01196	0.00445
510.315	-0.01249	0.00282
511.279	-0.01238	0.00183
512.243	-0.01192	0.00157
513.208	-0.01157	0.00188
514.172	-0.01148	0.00268
515.136	-0.01135	0.00418
516.1	-0.01041	0.00669
517.065	-0.00859	0.00946
518.029	-0.00656	0.01142
518.993	-0.0046	0.01246
519.957	-0.00285	0.01343
520.922	-0.00139	0.0153
521.886	-0.00038566	0.01762
522.85	2.84433e-05	0.01875
523.814	-2.21622e-05	0.0178
524.779	-0.000262996	0.01547
525.743	-0.000485171	0.01276
526.707	-0.000791779	0.01012
527.671	-0.00159	0.00742
528.635	-0.00313	0.00495
529.6	-0.00513	0.00224
530.564	-0.00719	-0.00126
531.528	-0.00905	-0.00487
532.492	-0.01069	-0.0072
533.457	-0.01225	-0.007
534.421	-0.01391	-0.00474
535.385	-0.01565	-0.00214
536.349	-0.0173	-0.000584443
537.314	-0.01873	0.00048813
538.278	-0.01986	0.0025
539.242	-0.02071	0.00602
540.206	-0.0215	0.00972
541.171	-0.02257	0.01159
542.135	-0.0239	0.01182
543.099	-0.0252	0.01162
544.063	-0.02613	0.01191
545.027	-0.02644	0.01262
545.992	-0.02595	0.01326
546.956	-0.02518	0.01317
547.92	-0.02517	0.01171
548.884	-0.02613	0.00814
549.849	-0.02698	0.0033
550.813	-0.02631	-0.000555402
551.777	-0.02347	-0.0021
552.741	-0.01985	-0.0019
553.706	-0.01693	-0.00154
554.67	-0.01465	-0.00194
555.634	-0.01236	-0.00277
556.598	-0.00981	-0.00316
557.562	-0.00748	-0.00279
558.527	-0.00629	-0.00197
559.491	-0.0066	-0.00161
560.455	-0.00756	-0.00206
561.419	-0.00829	-0.00256
562.384	-0.00854	-0.00278
563.348	-0.00815	-0.0025
564.312	-0.00715	-0.00174
565.276	-0.00602	-0.000738996
566.241	-0.00596	0.000138295
567.205	-0.00754	0.000658551
568.169	-0.00967	0.0012
569.133	-0.01068	0.00236
570.098	-0.01042	0.00407
571.062	-0.01028	0.00561
572.026	-0.01197	0.00619
572.99	-0.01448	0.00592
573.954	-0.01591	0.00482
574.919	-0.01616	0.00303
575.883	-0.01627	0.00102
576.847	-0.01717	-0.000737059
577.811	-0.01879	-0.00205
578.776	-0.02028	-0.00316
579.74	-0.02055	-0.00451
580.704	-0.01938	-0.00594
581.668	-0.01697	-0.00696
582.633	-0.01366	-0.00718
583.597	-0.00979	-0.00638
584.561	-0.00581	-0.00468
585.525	-0.00228	-0.00273
586.489	0.000414123	-0.00104
587.454	0.00241	0.000173363
588.418	0.00411	0.00071729
589.382	0.00578	0.000322557
590.346	0.00639	-0.000414705
591.311	0.00513	-0.000539201
592.275	0.00314	0.000379847
593.239	0.00151	0.00219
594.203	0.000515885	0.00459
595.168	0.000153202	0.0072
596.132	0.000604675	0.00959
597.096	0.00219	0.01155
598.06	0.00399	0.01325
599.025	0.00521	0.01475
599.989	0.00616	0.01583
600.953	0.00784	0.0161
601.917	0.01081	0.01521
602.881	0.01407	0.0141
603.846	0.01659	0.01351
604.81	0.01781	0.01305
605.774	0.01782	0.01242
606.738	0.01717	0.01157
607.703	0.01631	0.01068
608.667	0.01505	0.01029
609.631	0.01255	0.01118
610.595	0.0092	0.01311
611.56	0.00696	0.01535
612.524	0.00658	0.01745
613.488	0.00742	0.01907
614.452	0.00836	0.01977
615.416	0.00924	0.01999
616.381	0.00978	0.02059
617.345	0.00921	0.02156
618.309	0.00779	0.02195
619.273	0.00668	0.02075
620.238	0.0065	0.01812
621.202	0.00681	0.0156
622.166	0.0064	0.01506
623.13	0.00481	0.01623
624.095	0.00205	0.01788
625.059	-0.00134	0.01935
626.023	-0.00432	0.02066
626.987	-0.00574	0.02192
627.952	-0.00585	0.02319
628.916	-0.00526	0.02425
629.88	-0.00427	0.02467
630.844	-0.00301	0.02425
631.808	-0.00189	0.02297
632.773	-0.00101	0.02113
633.737	0.000182694	0.01943
634.701	0.00238	0.01867
635.665	0.00486	0.01835
636.63	0.00675	0.01724
637.594	0.0081	0.01503
638.558	0.00971	0.0126
639.522	0.01249	0.01144
640.487	0.01562	0.01136
641.451	0.01832	0.01107
642.415	0.01975	0.01015
643.379	0.0196	0.00934
644.344	0.01825	0.00936
645.308	0.01674	0.01011
646.272	0.01585	0.01112
647.236	0.01515	0.01203
648.2	0.01463	0.01233
649.165	0.0145	0.01156
650.129	0.0145	0.00996
651.093	0.01402	0.0085
652.057	0.01261	0.00827
653.022	0.01075	0.00857
653.986	0.00865	0.00842
654.95	0.00591	0.00732
655.914	0.00254	0.00536
656.879	-0.000756656	0.00297
657.843	-0.00298	0.000994288
658.807	-0.0039	-0.000124381
659.771	-0.00471	-0.00104
660.735	-0.00564	-0.00145
661.7	-0.00691	-0.000438995
662.664	-0.00837	0.00177
663.628	-0.00925	0.00377
664.592	-0.00849	0.00416
665.557	-0.00576	0.0034
666.521	-0.0015	0.00209
667.485	0.00332	0.000509471
668.449	0.00757	-0.000849237
669.414	0.01016	-0.00128
670.378	0.01135	-0.000450166
671.342	0.01214	0.00147
672.306	0.01326	0.00268
673.271	0.01429	0.00238
674.235	0.01445	0.00050382
675.199	0.01353	-0.00254
676.163	0.01183	-0.00622
677.127	0.0101	-0.00941
678.092	0.00876	-0.01077
679.056	0.00772	-0.00975
680.02	0.00671	-0.00699
680.984	0.00566	-0.00384
681.949	0.00465	-0.00161
682.913	0.00412	-0.0004358
683.877	0.00451	0.000574281
684.841	0.00545	0.00242
685.806	0.00612	0.00491
686.77	0.00596	0.00772
687.734	0.00578	0.01057
688.698	0.0076	0.01306
689.662	0.01162	0.01507
690.627	0.01549	0.01665
691.591	0.01724	0.01707
692.555	0.0172	0.01616
693.519	0.017	0.01447
694.484	0.01762	0.01262
695.448	0.01835	0.01029
696.412	0.01876	0.00755
697.376	0.01864	0.00555
698.341	0.01747	0.00474
699.305	0.01498	0.00459
700.269	0.01234	0.00409
701.233	0.01152	0.00299
702.198	0.01205	0.00187
703.162	0.0123	0.000867634
704.126	0.01115	-0.000196538
705.09	0.00913	-0.00121
706.054	0.0077	-0.00189
707.019	0.00835	-0.00236
707.983	0.01156	-0.00311
708.947	0.01537	-0.00399
709.911	0.0178	-0.00473
710.876	0.01891	-0.00534
711.84	0.01982	-0.00581
712.804	0.02111	-0.00577
713.768	0.02186	-0.00517
714.733	0.02109	-0.00483
715.697	0.01901	-0.00459
716.661	0.01602	-0.00377
717.625	0.01267	-0.00268
718.589	0.01003	-0.00253
719.554	0.00896	-0.00384
720.518	0.00883	-0.00603
721.482	0.00748	-0.00815
722.446	0.00478	-0.00951
723.411	0.00207	-0.00965
724.375	0.000519377	-0.00862
725.339	0.000333926	-0.00706
726.303	0.0015	-0.00589
727.268	0.00401	-0.00558
728.232	0.00703	-0.00584
729.196	0.00963	-0.0065
730.16	0.01196	-0.00778
731.125	0.0153	-0.01004
732.089	0.01852	-0.0118
733.053	0.02018	-0.01214
734.017	0.02023	-0.01182
734.981	0.01915	-0.01173
735.946	0.01748	-0.01283
736.91	0.01559	-0.01479
737.874	0.01338	-0.0163
738.838	0.01107	-0.01643
739.803	0.00977	-0.01558
740.767	0.01044	-0.01429
741.731	0.01266	-0.01287
742.695	0.01487	-0.01179
743.66	0.01582	-0.01159
744.624	0.01549	-0.01174
745.588	0.01435	-0.01147
746.552	0.01294	-0.01065
747.517	0.01165	-0.00981
748.481	0.01086	-0.00965
749.445	0.01141	-0.01027
750.409	0.01314	-0.01102
751.373	0.01416	-0.01066
752.338	0.01469	-0.00974
753.302	0.0156	-0.00937
754.266	0.01675	-0.00965
755.23	0.01745	-0.00972
756.195	0.01763	-0.00856
757.159	0.0177	-0.00624
758.123	0.01856	-0.00404
759.087	0.02058	-0.0029
760.052	0.02288	-0.00285
761.016	0.02408	-0.00365
761.98	0.0235	-0.00535
762.944	0.0218	-0.00743
763.908	0.01999	-0.00866
764.873	0.01838	-0.0088
765.837	0.01703	-0.00826
766.801	0.01595	-0.00694
767.765	0.01559	-0.00388
768.73	0.01627	6.02976e-05
769.694	0.01758	0.00351
770.658	0.01929	0.00555
771.622	0.02134	0.00629
772.587	0.02319	0.0064
773.551	0.02411	0.0062
774.515	0.02407	0.00541
775.479	0.02358	0.00389
776.444	0.02284	0.00211
777.408	0.02182	0.000726532
778.372	0.02056	-0.000133149
779.336	0.01911	-0.000992444
780.3	0.01769	-0.00232
781.265	0.0168	-0.00388
782.229	0.01682	-0.00485
783.193	0.01802	-0.00476
784.157	0.0205	-0.00416
785.122	0.02421	-0.00383
786.086	0.02827	-0.00255
787.05	0.03192	0.000369536
788.014	0.03442	0.00286
788.979	0.03557	0.00376
789.943	0.03564	0.00302
790.907	0.03602	0.00144
791.871	0.03818	-0.000782556
792.835	0.04158	-0.00365
793.8	0.04498	-0.00654
794.764	0.0473	-0.00854
795.728	0.04814	-0.00958
796.692	0.04724	-0.01072
797.657	0.0451	-0.01228
798.621	0.04304	-0.01313
799.585	0.04201	-0.01219
800.549	0.04196	-0.00969
801.514	0.04224	-0.00701
802.478	0.04245	-0.0055
803.442	0.04268	-0.00558
804.406	0.04271	-0.00683
805.371	0.04155	-0.00753
806.335	0.03889	-0.00758
807.299	0.03503	-0.00822
808.263	0.03117	-0.01057
809.227	0.02899	-0.01537
810.192	0.0289	-0.02055
811.156	0.02999	-0.02427
812.12	0.03014	-0.02598
813.084	0.02843	-0.02643
814.049	0.02487	-0.02711
815.013	0.02033	-0.0282
815.977	0.01547	-0.029
816.941	0.01164	-0.02797
817.906	0.01005	-0.02448
818.87	0.01058	-0.01961
819.834	0.01193	-0.01467
820.798	0.01281	-0.01005
821.762	0.013	-0.00551
822.727	0.01283	-0.000869384
823.691	0.01228	0.00368
824.655	0.01159	0.00796
825.619	0.01176	0.01157
826.584	0.01393	0.01384
827.548	0.01814	0.01406
828.512	0.02362	0.01237
829.476	0.02843	0.01116
830.441	0.03169	0.01107
831.405	0.03299	0.01118
832.369	0.03349	0.01014
833.333	0.03478	0.00757
834.298	0.03651	0.00498
835.262	0.03775	0.0032
836.226	0.03829	0.00228
837.19	0.03837	0.00202
838.154	0.03737	0.00244
839.119	0.035	0.00334
840.083	0.03178	0.0043
841.047	0.02851	0.0048
842.011	0.02552	0.00445
842.976	0.0229	0.00302
843.94	0.02157	0.000794188
844.904	0.02293	-0.00136
845.868	0.02657	-0.00301
846.833	0.02974	-0.00451
847.797	0.03059	-0.00605
848.761	0.02895	-0.00707
849.725	0.02659	-0.00698
850.69	0.02539	-0.00583
851.654	0.0263	-0.00493
852.618	0.02873	-0.00486
853.582	0.03021	-0.00482
854.546	0.02961	-0.00412
855.511	0.02684	-0.00259
856.475	0.0229	-0.00102
857.439	0.01864	-0.000175707
858.403	0.01517	-0.000258057
859.368	0.01262	-0.000989461
860.332	0.01066	-0.00195
861.296	0.0098	-0.0029
862.26	0.01134	-0.00331
863.225	0.0153	-0.00283
864.189	0.02072	-0.00172
865.153	0.02537	-0.000685308
866.117	0.02741	3.89102e-05
867.081	0.02699	0.000893987
868.046	0.02626	0.00215
869.01	0.0273	0.00378
869.974	0.02981	0.00502
870.938	0.03219	0.00456
871.903	0.03367	0.00231
872.867	0.0334	-0.000563902
873.831	0.03074	-0.0025
874.795	0.02609	-0.00307
875.76	0.02178	-0.00356
876.724	0.01919	-0.00462
877.688	0.01813	-0.00567
878.652	0.01772	-0.00612
879.617	0.01793	-0.0057
880.581	0.01959	-0.00445
881.545	0.02242	-0.00238
882.509	0.025	-0.000220788
883.473	0.02684	0.0015
884.438	0.02811	0.00297
885.402	0.02889	0.00389
886.366	0.02949	0.0029
887.33	0.03033	0.00105
888.295	0.03128	0.000173861
889.259	0.0315	0.000711546
890.223	0.03049	0.00117
891.187	0.02804	-0.000224205
892.152	0.02484	-0.00159
893.116	0.02187	-0.000580444
894.08	0.02043	0.00254
895.044	0.02166	0.00595
896.008	0.02504	0.00874
896.973	0.02858	0.01133
897.937	0.03051	0.01424
898.901	0.03076	0.01749
899.865	0.03016	0.02101
900.83	0.02919	0.02457
901.794	0.02842	0.02734
902.758	0.02842	0.02851
903.722	0.02917	0.02766
904.687	0.02989	0.0248
905.651	0.03012	0.02077
906.615	0.02962	0.01783
907.579	0.02866	0.01577
908.544	0.02766	0.01293
909.508	0.02709	0.0092
910.472	0.02733	0.00605
911.436	0.02838	0.00581
912.4	0.02949	0.00824
913.365	0.02998	0.0114
914.329	0.03014	0.01355
915.293	0.03004	0.01378
916.257	0.0295	0.0136
917.222	0.02926	0.0145
918.186	0.02952	0.01673
919.15	0.02906	0.01948
920.114	0.02535	0.02158
921.079	0.02146	0.02292
922.043	0.0203	0.0234
923.007	0.02151	0.0234
923.971	0.02337	0.02359
924.935	0.02514	0.02421
925.9	0.02746	0.02397
926.864	0.03091	0.0213
927.828	0.03492	0.01772
928.792	0.03861	0.01592
929.757	0.04097	0.01618
930.721	0.04076	0.01696
931.685	0.03737	0.01734
932.649	0.03219	0.01698
933.614	0.02747	0.0156
934.578	0.02401	0.01379
935.542	0.02193	0.01372
936.506	0.02077	0.01629
937.471	0.01889	0.01995
938.435	0.01547	0.0221
939.399	0.01144	0.02225
940.363	0.01074	0.02231
941.327	0.01277	0.02342
942.292	0.0155	0.02595
943.256	0.01853	0.0296
944.22	0.02235	0.0334
945.184	0.0273	0.03536
946.149	0.03282	0.0351
947.113	0.03742	0.03476
948.077	0.04002	0.03563
949.041	0.04022	0.03745
950.006	0.03881	0.03901
950.97	0.0368	0.03982
951.934	0.03531	0.03994
952.898	0.03443	0.03955
953.863	0.03363	0.03919
954.827	0.03294	0.03936
955.791	0.03259	0.03975
956.755	0.03272	0.03912
957.719	0.03342	0.03698
958.684	0.03415	0.03485
959.648	0.03415	0.0343
960.612	0.03356	0.03583
961.576	0.03261	0.03774
962.541	0.03099	0.03843
963.505	0.02886	0.03767
964.469	0.02668	0.03568
965.433	0.02491	0.03316
966.398	0.02365	0.03125
967.362	0.02352	0.0309
968.326	0.0245	0.0317
969.29	0.02643	0.03289
970.254	0.02855	0.03436
971.219	0.03005	0.03605
972.183	0.03083	0.03773
973.147	0.03108	0.0393
974.111	0.03118	0.04064
975.076	0.03088	0.04187
976.04	0.0296	0.04337
977.004	0.02682	0.04545
977.968	0.02299	0.04812
978.933	0.01916	0.05151
979.897	0.01554	0.05452
980.861	0.01149	0.05433
981.825	0.00705	0.05025
982.79	0.00372	0.04455
983.754	0.00238	0.0398
984.718	0.00318	0.03705
985.682	0.00599	0.03663
986.646	0.0104	0.03823
987.611	0.01497	0.04061
988.575	0.01888	0.04292
989.539	0.02203	0.0446
990.503	0.02448	0.04483
991.468	0.02593	0.04349
992.432	0.02586	0.04178
993.396	0.02416	0.04108
994.36	0.02074	0.04132
995.325	0.01561	0.04047
996.289	0.00958	0.03774
997.253	0.00485	0.03496
998.217	0.00238	0.03352
999.181	0.000894216	0.03244
1000.15	-0.0013	0.03054
1001.11	-0.00452	0.02853
1002.07	-0.00733	0.02819
1003.04	-0.00886	0.03004
1004	-0.00899	0.03306
1004.97	-0.00796	0.0363
1005.93	-0.00615	0.03919
1006.89	-0.00388	0.04153
1007.86	-0.0014	0.04319
1008.82	0.000595993	0.04385
1009.79	0.0015	0.04343
1010.75	0.00117	0.04251
1011.72	0.000144263	0.04154
1012.68	-0.00105	0.03965
1013.64	-0.00274	0.03633
1014.61	-0.00511	0.03194
1015.57	-0.00728	0.02858
1016.54	-0.00813	0.0279
1017.5	-0.00776	0.0291
1018.47	-0.00702	0.03104
1019.43	-0.00618	0.03303
1020.39	-0.00506	0.03448
1021.36	-0.00337	0.03477
1022.32	-0.00156	0.03381
1023.29	0.000635213	0.03254
1024.25	0.00368	0.03184
1025.22	0.00686	0.03212
1026.18	0.0093	0.03382
1027.14	0.01051	0.03625
1028.11	0.01045	0.03815
1029.07	0.00977	0.03865
1030.04	0.00858	0.038
1031	0.00678	0.03632
1031.96	0.0046	0.03508
1032.93	0.00248	0.03669
1033.89	0.00128	0.04139
1034.86	0.00081514	0.04634
1035.82	0.000379721	0.0488
1036.79	0.000290974	0.04989
1037.75	0.000803386	0.05157
1038.71	0.00184	0.05383
1039.68	0.00274	0.0549
1040.64	0.00382	0.05384
1041.61	0.00512	0.0517
1042.57	0.00674	0.04938
1043.54	0.00835	0.04748
1044.5	0.00912	0.04647
1045.46	0.00934	0.04679
1046.43	0.00978	0.04769
1047.39	0.01092	0.04905
1048.36	0.01258	0.0504
1049.32	0.01397	0.05154
1050.29	0.01521	0.05212
1051.25	0.01733	0.05338
1052.21	0.02067	0.05612
1053.18	0.02448	0.05868
1054.14	0.02809	0.0584
1055.11	0.03085	0.05582
1056.07	0.03203	0.05417
1057.04	0.02988	0.05451
1058	0.0262	0.05507
1058.96	0.02281	0.05453
1059.93	0.0205	0.05257
1060.89	0.01916	0.04936
1061.86	0.01906	0.04494
1062.82	0.01884	0.04137
1063.79	0.01601	0.04051
1064.75	0.01217	0.04187
1065.71	0.0099	0.04401
1066.68	0.01002	0.04629
1067.64	0.01129	0.04796
1068.61	0.01238	0.04917
1069.57	0.01301	0.05
1070.54	0.01255	0.05051
1071.5	0.01154	0.05051
1072.46	0.0113	0.0494
1073.43	0.0127	0.04751
1074.39	0.01297	0.04605
1075.36	0.00958	0.0462
1076.32	0.00418	0.04713
1077.28	0.00142	0.04679
1078.25	0.00225	0.04477
1079.21	0.0053	0.04176
1080.18	0.00933	0.03907
1081.14	0.01251	0.03776
1082.11	0.01224	0.03905
1083.07	0.00943	0.04256
1084.03	0.00901	0.04652
1085	0.01286	0.05034
1085.96	0.01826	0.05366
1086.93	0.02191	0.0557
1087.89	0.02391	0.05662
1088.86	0.02607	0.05666
1089.82	0.02929	0.05643
1090.78	0.03331	0.05602
1091.75	0.03656	0.05505
1092.71	0.03885	0.05411
1093.68	0.03912	0.05391
1094.64	0.03813	0.05434
1095.61	0.0384	0.05396
1096.57	0.04137	0.05239
1097.53	0.04468	0.05053
1098.5	0.04579	0.04921
1099.46	0.04417	0.04888
1100.43	0.03982	0.04941
1101.39	0.03319	0.05078
1102.35	0.0264	0.05216
1103.32	0.0206	0.0532
1104.28	0.01622	0.05264
1105.25	0.01302	0.04862
1106.21	0.01128	0.04158
1107.18	0.01129	0.03492
1108.14	0.01126	0.03144
1109.1	0.01153	0.02986
1110.07	0.01229	0.02846
1111.03	0.01337	0.02709
1112	0.01537	0.02701
1112.96	0.01756	0.02834
1113.92	0.02081	0.03079
1114.89	0.02542	0.03444
1115.85	0.03114	0.03818
1116.82	0.0364	0.04025
1117.78	0.04076	0.04021
1118.75	0.04322	0.04023
1119.71	0.04241	0.04226
1120.67	0.03983	0.04421
1121.64	0.03754	0.04362
1122.6	0.03593	0.04028
1123.57	0.03472	0.03469
1124.53	0.03306	0.0283
1125.5	0.03153	0.02268
1126.46	0.03061	0.01888
1127.42	0.03045	0.01714
1128.39	0.03302	0.01624
1129.35	0.03746	0.01624
1130.32	0.04168	0.01603
1131.28	0.04487	0.0145
1132.25	0.04728	0.01302
1133.21	0.05	0.01313
1134.17	0.05261	0.01477
1135.14	0.05462	0.01592
1136.1	0.05533	0.01599
1137.07	0.05481	0.01677
1138.03	0.05297	0.01998
1138.99	0.05026	0.02427
1139.96	0.04851	0.02586
1140.92	0.04715	0.02445
1141.89	0.04324	0.02279
1142.85	0.0353	0.02272
1143.82	0.02702	0.02285
1144.78	0.02328	0.02103
1145.74	0.02411	0.0174
1146.71	0.02623	0.01367
1147.67	0.02805	0.0104
1148.64	0.03059	0.00706
1149.6	0.03476	0.00285
1150.57	0.03933	-0.00154
1151.53	0.042	-0.00422
1152.49	0.04221	-0.00538
1153.46	0.04132	-0.00646
1154.42	0.04025	-0.00824
1155.39	0.03927	-0.00977
1156.35	0.03902	-0.00974
1157.32	0.03919	-0.00891
1158.28	0.03944	-0.00953
1159.24	0.0393	-0.01213
1160.21	0.03746	-0.01529
1161.17	0.03316	-0.01757
1162.14	0.02879	-0.01949
1163.1	0.02845	-0.02224
1164.07	0.03167	-0.02599
1165.03	0.035	-0.03041
1165.99	0.03623	-0.03482
1166.96	0.03619	-0.03868
1167.92	0.03635	-0.04134
1168.89	0.03565	-0.04277
1169.85	0.03179	-0.0434
1170.82	0.02478	-0.04358
1171.78	0.01701	-0.0437
1172.74	0.01053	-0.04406
1173.71	0.00501	-0.04403
1174.67	-0.000299451	-0.04302
1175.64	-0.00508	-0.04103
1176.6	-0.00843	-0.03818
1177.57	-0.00978	-0.0353
1178.53	-0.00966	-0.03325
1179.49	-0.00852	-0.0331
1180.46	-0.00672	-0.03412
1181.42	-0.00478	-0.03561
1182.39	-0.00266	-0.03739
1183.35	-0.000835798	-0.03975
1184.31	0.00046387	-0.04277
1185.28	0.00121	-0.04643
1186.24	0.00106	-0.05058
1187.21	0.000530109	-0.0548
1188.17	-7.44603e-05	-0.05896
1189.14	-0.00101	-0.06258
1190.1	-0.00245	-0.06492
1191.06	-0.005	-0.06514
1192.03	-0.00803	-0.06437
1192.99	-0.01141	-0.06359
1193.96	-0.01451	-0.06267
1194.92	-0.01645	-0.0608
1195.88	-0.0168	-0.05785
1196.85	-0.01575	-0.05513
1197.81	-0.01355	-0.05364
1198.78	-0.0121	-0.05381
1199.74	-0.01362	-0.0544
1200.71	-0.01767	-0.05483
1201.67	-0.02117	-0.05415
1202.63	-0.02241	-0.05194
1203.6	-0.02167	-0.04941
1204.56	-0.01976	-0.04794
1205.53	-0.01725	-0.04777
1206.49	-0.01402	-0.04851
1207.46	-0.01014	-0.04951
1208.42	-0.00547	-0.04896
1209.38	-0.000566599	-0.04625
1210.35	0.00389	-0.04285
1211.31	0.00827	-0.04128
1212.28	0.01215	-0.04136
1213.24	0.01578	-0.04163
1214.21	0.0189	-0.04125
1215.17	0.02031	-0.03982
1216.13	0.01933	-0.03726
1217.1	0.01669	-0.03398
1218.06	0.01353	-0.0307
1219.03	0.01005	-0.02764
1219.99	0.00664	-0.02455
1220.95	0.00425	-0.02114
1221.92	0.00302	-0.0179
1222.88	0.0027	-0.01564
1223.85	0.00309	-0.01408
1224.81	0.00386	-0.01266
1225.78	0.00505	-0.01105
1226.74	0.00766	-0.00865
1227.7	0.01234	-0.00507
1228.67	0.01763	-0.00128
1229.63	0.022	0.000876811
1230.6	0.02494	0.00358
1231.56	0.02617	0.00991
1232.53	0.02664	0.0195
1233.49	0.02782	0.02997
1234.45	0.03094	0.03962
1235.42	0.03566	0.0479
1236.38	0.04215	0.05414
1237.35	0.04916	0.05949
1238.31	0.05331	0.06487
1239.28	0.05443	0.07091
1240.24	0.05633	0.07818
1241.2	0.06136	0.0869
1242.17	0.06853	0.09638
1243.13	0.07648	0.10593
1244.1	0.08478	0.11459
1245.06	0.0937	0.12111
1246.03	0.10304	0.12569
1246.99	0.11148	0.12984
1247.95	0.11859	0.1348
1248.92	0.12513	0.14172
1249.88	0.13202	0.15321
1250.85	0.14014	0.16815
1251.81	0.15126	0.18245
1252.78	0.16537	0.19432
1253.74	0.1801	0.20485
1254.7	0.1923	0.21519
1255.67	0.20206	0.22498
1256.63	0.21006	0.23401
1257.6	0.21728	0.24401
1258.56	0.22614	0.25661
1259.53	0.23777	0.27145
1260.49	0.24965	0.28662
1261.45	0.25834	0.29992
1262.42	0.26634	0.312
1263.38	0.27695	0.32409
1264.35	0.2897	0.33559
1265.31	0.30204	0.34621
1266.27	0.31266	0.35661
1267.24	0.32353	0.36826
1268.2	0.33655	0.38216
1269.17	0.3511	0.39707
1270.13	0.36606	0.4113
1271.1	0.38113	0.42511
1272.06	0.39596	0.44111
1273.02	0.41054	0.45997
1273.99	0.42631	0.47796
1274.95	0.44445	0.49261
1275.92	0.46397	0.5058
1276.88	0.48281	0.52233
1277.85	0.50028	0.54248
1278.81	0.51583	0.56317
1279.77	0.52973	0.58265
1280.74	0.54406	0.60152
1281.7	0.56261	0.62169
1282.67	0.58444	0.64252
1283.63	0.60632	0.66147
1284.6	0.62686	0.67842
1285.56	0.64589	0.69485
1286.52	0.66438	0.71217
1287.49	0.6827	0.72982
1288.45	0.70065	0.74684
1289.42	0.71783	0.76233
1290.38	0.73488	0.77647
1291.34	0.75224	0.79082
1292.31	0.76991	0.80514
1293.27	0.78787	0.81818
1294.24	0.80531	0.83119
1295.2	0.82112	0.84604
1296.16	0.83425	0.86234
1297.13	0.84491	0.87787
1298.09	0.85447	0.89138
1299.06	0.86501	0.90351
1300.02	0.8777	0.91475
1300.99	0.89218	0.92464
1301.95	0.90731	0.93292
1302.91	0.92218	0.94065
1303.88	0.9358	0.94951
1304.84	0.94744	0.95898
1305.81	0.9573	0.96743
1306.77	0.96612	0.97399
1307.74	0.97392	0.9783
1308.7	0.97998	0.97939
1309.66	0.98509	0.97819
1310.63	0.99059	0.97701
1311.59	0.99563	0.97709
1312.56	0.99886	0.97842
1313.52	1	0.98025
1314.49	0.99918	0.98229
1315.45	0.99591	0.9842
1316.41	0.99265	0.98685
1317.38	0.99265	0.99112
1318.34	0.99538	0.99582
1319.31	0.99822	0.99908
1320.27	0.99912	1
1321.24	0.99672	0.99961
1322.2	0.99021	0.99882
1323.16	0.98099	0.9969
1324.13	0.9703	0.99205
1325.09	0.95888	0.9839
1326.06	0.94822	0.97378
1327.02	0.93819	0.96217
1327.98	0.92672	0.94846
1328.95	0.91384	0.93298
1329.91	0.90144	0.91732
1330.88	0.89008	0.90375
1331.84	0.8794	0.89161
1332.81	0.86991	0.87846
1333.77	0.86169	0.86532
1334.73	0.85441	0.85537
1335.7	0.84845	0.8506
1336.66	0.84207	0.84741
1337.63	0.83154	0.84111
1338.59	0.81652	0.8315
1339.56	0.79828	0.81993
1340.52	0.77761	0.80755
1341.48	0.75536	0.79454
1342.45	0.73326	0.78087
1343.41	0.71286	0.76698
1344.38	0.69427	0.75326
1345.34	0.67661	0.73936
1346.31	0.65786	0.72413
1347.27	0.63757	0.70747
1348.23	0.61858	0.69098
1349.2	0.60308	0.67543
1350.16	0.59018	0.65965
1351.13	0.57765	0.64152
1352.09	0.56569	0.62147
1353.06	0.5557	0.60265
1354.02	0.54552	0.58665
1354.98	0.53201	0.572
1355.95	0.51524	0.55566
1356.91	0.49764	0.53762
1357.88	0.48192	0.51984
1358.84	0.46785	0.50377
1359.81	0.45468	0.49039
1360.77	0.44179	0.47917
1361.73	0.42961	0.46919
1362.7	0.41891	0.45966
1363.66	0.40905	0.44962
1364.63	0.39893	0.43858
1365.59	0.38788	0.42767
1366.56	0.37597	0.41798
1367.52	0.36353	0.40896
1368.48	0.35054	0.39879
1369.45	0.3366	0.38632
1370.41	0.32211	0.37137
1371.38	0.30782	0.35481
1372.34	0.29325	0.33787
1373.3	0.27536	0.32215
1374.27	0.25544	0.30782
1375.23	0.23799	0.29437
1376.2	0.22473	0.28158
1377.16	0.21441	0.2698
1378.12	0.20574	0.25994
1379.09	0.19954	0.25136
1380.05	0.19567	0.24269
1381.02	0.19142	0.23419
1381.98	0.18502	0.22641
1382.95	0.17712	0.21925
1383.91	0.16911	0.21288
1384.88	0.16128	0.20759
1385.84	0.15338	0.20203
1386.8	0.14542	0.19472
1387.77	0.13749	0.1853
1388.73	0.12924	0.17423
1389.7	0.11943	0.1627
1390.66	0.10662	0.1534
1391.62	0.09232	0.14577
1392.59	0.07894	0.13724
1393.55	0.06824	0.12708
1394.52	0.05987	0.11779
1395.48	0.0524	0.11133
1396.45	0.04538	0.10493
1397.41	0.03924	0.09662
1398.37	0.03484	0.08744
1399.34	0.03149	0.07966
1400.3	0.02729	0.07434
1401.27	0.02302	0.07055
1402.23	0.02052	0.06682
1403.19	0.02026	0.06186
1404.16	0.02115	0.05515
1405.12	0.02215	0.04777
1406.09	0.02317	0.04189
1407.05	0.02378	0.03799
1408.02	0.0227	0.03589
1408.98	0.0189	0.03568
1409.94	0.01351	0.0369
1410.91	0.00947	0.03687
1411.87	0.00779	0.03568
1412.84	0.00801	0.03602
1413.8	0.00872	0.03921
1414.77	0.00889	0.04328
1415.73	0.00815	0.04434
1416.69	0.00695	0.04259
1417.66	0.00609	0.04049
1418.62	0.00559	0.04001
1419.59	0.00503	0.04082
1420.55	0.00472	0.04088
1421.52	0.00565	0.03783
1422.48	0.00723	0.03218
1423.44	0.00845	0.02623
1424.41	0.00851	0.02175
1425.37	0.00722	0.01856
1426.34	0.00453	0.01508
1427.3	0.000370718	0.01152
1428.27	-0.00469	0.00836
1429.23	-0.00829	0.00599
1430.19	-0.00845	0.0047
1431.16	-0.0052	0.00465
1432.12	-0.000484054	0.00507
1433.09	0.00381	0.00521
1434.05	0.00707	0.0047
1435.02	0.00936	0.00336
1435.98	0.01072	0.0015
1436.94	0.01021	0.000221981
1437.91	0.00948	0.000823257
1438.87	0.01179	0.00325
1439.84	0.0168	0.00524
1440.8	0.02094	0.00514
1441.77	0.02077	0.00419
1442.73	0.01891	0.00376
1443.69	0.0178	0.00356
1444.66	0.01688	0.00371
1445.62	0.01505	0.00492
1446.59	0.01205	0.00769
1447.55	0.00894	0.01178
1448.51	0.00796	0.01637
1449.48	0.00937	0.01967
1450.44	0.01167	0.02051
1451.41	0.01377	0.01932
1452.37	0.01597	0.01656
1453.34	0.01836	0.01414
1454.3	0.02067	0.01478
1455.26	0.02308	0.01783
1456.23	0.02638	0.02119
1457.19	0.03261	0.02411
1458.16	0.04056	0.02727
1459.12	0.04606	0.02978
1460.09	0.04773	0.03142
1461.05	0.04796	0.03315
1462.01	0.0507	0.03588
1462.98	0.0559	0.03928
1463.94	0.06035	0.04291
1464.91	0.06117	0.04541
1465.87	0.05854	0.0461
1466.84	0.05497	0.04564
1467.8	0.05303	0.04453
1468.76	0.05171	0.04133
1469.73	0.0503	0.03618
1470.69	0.04829	0.03153
1471.66	0.045	0.02962
1472.62	0.04069	0.03134
1473.58	0.03747	0.03281
1474.55	0.03647	0.02983
1475.51	0.03631	0.02429
1476.48	0.03527	0.01954
1477.44	0.03248	0.01712
1478.41	0.02823	0.01638
1479.37	0.02425	0.01658
1480.33	0.02253	0.01689
1481.3	0.02304	0.01654
1482.26	0.02381	0.01528
1483.23	0.02175	0.01292
1484.19	0.01811	0.01038
1485.15	0.01667	0.00961
1486.12	0.01757	0.01126
1487.08	0.01824	0.0144
1488.05	0.01596	0.01706
1489.01	0.01174	0.01971
1489.98	0.00684	0.02328
1490.94	0.00339	0.02634
1491.9	0.00324	0.0264
1492.87	0.00604	0.02288
1493.83	0.00856	0.01955
1494.8	0.00898	0.01954
1495.76	0.00749	0.02232
1496.73	0.00515	0.02562
1497.69	0.00275	0.02814
1498.65	0.00181	0.02959
1499.62	0.00348	0.03019
1500.58	0.00606	0.03051
1501.55	0.0065	0.0314
1502.51	0.00425	0.03354
1503.48	0.00237	0.03692
1504.44	0.00209	0.04011
1505.4	0.000648171	0.04235
1506.37	-0.00277	0.04358
1507.33	-0.00667	0.04479
1508.3	-0.0097	0.04748
1509.26	-0.01133	0.05223
1510.22	-0.01206	0.05525
1511.19	-0.01357	0.05521
1512.15	-0.01645	0.05466
1513.12	-0.01984	0.0558
1514.08	-0.02214	0.05794
1515.05	-0.02253	0.05869
1516.01	-0.02149	0.05769
1516.97	-0.02042	0.05775
1517.94	-0.01969	0.06055
1518.9	-0.01836	0.06383
1519.87	-0.01757	0.06392
1520.83	-0.01676	0.06403
1521.8	-0.01324	0.06642
1522.76	-0.00545	0.07005
1523.72	0.00552	0.07324
1524.69	0.01613	0.07678
1525.65	0.02374	0.08285
1526.62	0.02795	0.09231
1527.58	0.02989	0.10333
1528.55	0.03064	0.11272
1529.51	0.03096	0.1179
1530.47	0.03265	0.12159
1531.44	0.03684	0.12742
1532.4	0.04329	0.13583
1533.37	0.0509	0.14481
1534.33	0.05843	0.15339
1535.3	0.06437	0.16373
1536.26	0.06952	0.17637
1537.22	0.07571	0.18829
1538.19	0.08392	0.19585
1539.15	0.09392	0.19926
1540.12	0.10626	0.204
1541.08	0.11907	0.21017
1542.05	0.13036	0.21635
1543.01	0.13971	0.22269
1543.97	0.14712	0.23081
1544.94	0.15271	0.24183
1545.9	0.15824	0.25429
1546.87	0.16533	0.26589
1547.83	0.17443	0.27659
1548.8	0.18588	0.28822
1549.76	0.20042	0.30153
1550.72	0.2158	0.31608
1551.69	0.22868	0.33119
1552.65	0.23893	0.34637
1553.62	0.24892	0.36153
1554.58	0.26103	0.37636
1555.54	0.27533	0.3896
1556.51	0.29013	0.40042
1557.47	0.30395	0.40901
1558.44	0.31636	0.41626
1559.4	0.32749	0.42415
1560.37	0.33807	0.43452
1561.33	0.34938	0.44793
1562.29	0.36157	0.46379
1563.26	0.37458	0.481
1564.22	0.38884	0.49806
1565.19	0.40481	0.51308
1566.15	0.42208	0.52645
1567.12	0.44064	0.53949
1568.08	0.45921	0.55283
1569.04	0.47573	0.5663
1570.01	0.48841	0.57957
1570.97	0.49916	0.59341
1571.94	0.5115	0.60756
1572.9	0.52635	0.61941
1573.87	0.5421	0.62754
1574.83	0.55648	0.63414
1575.79	0.56848	0.64361
1576.76	0.58025	0.65498
1577.72	0.59394	0.66726
1578.69	0.60951	0.68056
1579.65	0.62575	0.69477
1580.61	0.64156	0.70885
1581.58	0.65651	0.72243
1582.54	0.67092	0.73522
1583.51	0.6849	0.74728
1584.47	0.69813	0.75926
1585.44	0.71126	0.77146
1586.4	0.72589	0.78031
1587.36	0.73923	0.78812
1588.33	0.74987	0.79824
1589.29	0.75942	0.81042
1590.26	0.76975	0.82143
1591.22	0.77935	0.82801
1592.18	0.78576	0.82921
1593.15	0.78827	0.82773
1594.11	0.7877	0.8279
1595.08	0.78542	0.83084
1596.04	0.78435	0.83204
1597.01	0.78479	0.83098
1597.97	0.78494	0.82928
1598.93	0.78371	0.82819
1599.9	0.78075	0.82791
1600.86	0.77523	0.82761
1601.83	0.76709	0.82618
1602.79	0.75744	0.82266
1603.76	0.7479	0.81606
1604.72	0.74049	0.8056
1605.68	0.73633	0.79281
1606.65	0.72971	0.78246
1607.61	0.71783	0.77377
1608.58	0.70248	0.76295
1609.54	0.68626	0.74807
1610.51	0.66919	0.73003
1611.47	0.64963	0.70866
1612.43	0.62827	0.68504
1613.4	0.60742	0.66277
1614.36	0.5881	0.64346
1615.33	0.56816	0.62382
1616.29	0.54418	0.60068
1617.26	0.51787	0.57666
1618.22	0.49094	0.55316
1619.18	0.46386	0.52927
1620.15	0.43717	0.50383
1621.11	0.4119	0.47688
1622.08	0.38853	0.44906
1623.04	0.36705	0.42164
1624.01	0.34692	0.39591
1624.97	0.32693	0.37228
1625.93	0.30459	0.35074
1626.9	0.28152	0.33195
1627.86	0.25986	0.31462
1628.83	0.23954	0.29717
1629.79	0.21986	0.27907
1630.76	0.20143	0.26127
1631.72	0.18517	0.24583
1632.68	0.17032	0.23338
1633.65	0.15458	0.22117
1634.61	0.13603	0.2056
1635.58	0.11618	0.18675
1636.54	0.09923	0.16864
1637.5	0.08524	0.15142
1638.47	0.07386	0.13525
1639.43	0.06485	0.12101
1640.4	0.0575	0.10905
1641.36	0.05106	0.09893
1642.33	0.04543	0.0907
1643.29	0.04046	0.08447
1644.25	0.03622	0.08019
1645.22	0.03267	0.07773
1646.18	0.0286	0.07607
1647.15	0.02431	0.07491
1648.11	0.02123	0.07523
1649.08	0.01926	0.07686
1650.04	0.01608	0.07811
1651	0.01196	0.07765
1651.97	0.01086	0.07526
1652.93	0.01318	0.07152
1653.9	0.01612	0.06742
1654.86	0.0175	0.06347
1655.83	0.01698	0.05922
1656.79	0.01513	0.05459
1657.75	0.01214	0.05124
1658.72	0.00821	0.04979
1659.68	0.00411	0.04942
1660.65	0.000359145	0.04948
1661.61	-0.00232	0.04979
1662.57	-0.00274	0.04995
1663.54	-0.00207	0.04976
1664.5	-0.0024	0.0493
1665.47	-0.00409	0.04892
1666.43	-0.00474	0.05001
1667.39	-0.00484	0.05159
1668.36	-0.00642	0.05179
1669.32	-0.00903	0.05051
1670.29	-0.00781	0.04885
1671.25	-0.000522397	0.04662
1672.22	0.00772	0.04468
1673.18	0.01359	0.04379
1674.14	0.01764	0.04352
1675.11	0.02109	0.04293
1676.07	0.02348	0.04263
1677.04	0.02449	0.04431
1678	0.02452	0.04766
1678.97	0.02414	0.05077
1679.93	0.02344	0.05161
1680.89	0.02341	0.05156
1681.86	0.02405	0.05211
1682.82	0.02362	0.05239
1683.79	0.02161	0.05132
1684.75	0.01937	0.04927
1685.72	0.01897	0.04796
1686.68	0.02014	0.04744
1687.64	0.02232	0.04644
1688.61	0.0249	0.04443
1689.57	0.02636	0.04218
1690.54	0.02454	0.04107
1691.5	0.02366	0.0406
1692.46	0.02679	0.03987
1693.43	0.03184	0.03933
1694.39	0.03527	0.0398
1695.36	0.03669	0.04088
1696.32	0.03697	0.04108
1697.29	0.03623	0.0397
1698.25	0.03481	0.03743
1699.21	0.03295	0.0354
1700.18	0.03051	0.03464
1701.14	0.02727	0.03394
1702.11	0.02402	0.03308
1703.07	0.02149	0.03302
1704.04	0.02025	0.03406
1705	0.02068	0.03518
1705.96	0.02048	0.03539
1706.93	0.01745	0.03457
1707.89	0.01245	0.03341
1708.86	0.00816	0.03218
1709.82	0.00709	0.03032
1710.79	0.01138	0.02715
1711.75	0.01764	0.024
1712.71	0.02252	0.02208
1713.68	0.02615	0.02108
1714.64	0.0311	0.01961
1715.61	0.03844	0.01739
1716.57	0.0454	0.01607
1717.54	0.05003	0.01623
1718.5	0.05248	0.01659
1719.46	0.05387	0.01605
1720.43	0.05549	0.0161
1721.39	0.05918	0.01817
1722.36	0.06319	0.02157
1723.32	0.06426	0.02527
1724.29	0.06114	0.02889
1725.25	0.05542	0.032
1726.21	0.04934	0.03414
1727.18	0.04509	0.03649
1728.14	0.0422	0.04019
1729.11	0.03819	0.0441
1730.07	0.03245	0.04576
1731.04	0.02597	0.04526
1732	0.01927	0.04304
1732.96	0.01409	0.03962
1733.93	0.0133	0.03535
1734.89	0.01604	0.03049
1735.86	0.01792	0.02524
1736.82	0.01935	0.02008
1737.78	0.02352	0.0156
1738.75	0.03107	0.01218
1739.71	0.03766	0.01031
1740.68	0.04042	0.0101
1741.64	0.0396	0.01033
1742.61	0.0373	0.00982
1743.57	0.03577	0.00872
1744.53	0.03606	0.00804
1745.5	0.03763	0.00925
1746.46	0.04024	0.01323
1747.43	0.04305	0.01774
1748.39	0.04466	0.01962
1749.36	0.04458	0.01847
1750.32	0.0427	0.01645
1751.28	0.04094	0.01387
1752.25	0.04247	0.01114
1753.21	0.04803	0.00887
1754.18	0.05329	0.00799
1755.14	0.05522	0.00915
1756.11	0.05652	0.01271
1757.07	0.05888	0.01839
1758.03	0.05971	0.02504
1759	0.05517	0.03085
1759.96	0.04822	0.03582
1760.93	0.04446	0.04119
1761.89	0.04296	0.04652
1762.86	0.03986	0.04997
1763.82	0.03424	0.05098
1764.78	0.02958	0.05264
1765.75	0.02691	0.05627
1766.71	0.02451	0.06007
1767.68	0.02166	0.06222
1768.64	0.01988	0.06241
1769.6	0.02082	0.06072
1770.57	0.02239	0.05821
1771.53	0.02254	0.05588
1772.5	0.02206	0.05409
1773.46	0.02335	0.05265
1774.42	0.02691	0.05172
1775.39	0.0329	0.05163
1776.35	0.03929	0.05248
1777.32	0.04319	0.05425
1778.28	0.04395	0.05708
1779.25	0.0451	0.06138
1780.21	0.04726	0.06621
1781.17	0.04675	0.06758
1782.14	0.04159	0.0642
1783.1	0.03484	0.06152
1784.07	0.03008	0.06535
1785.03	0.02685	0.07139
1786	0.02408	0.07491
1786.96	0.02204	0.07535
1787.92	0.02173	0.07413
1788.89	0.02252	0.07184
1789.85	0.0223	0.06909
1790.82	0.02224	0.06613
1791.78	0.02563	0.06293
1792.75	0.03301	0.05956
1793.71	0.03948	0.05618
1794.67	0.04281	0.05282
1795.64	0.0434	0.04949
1796.6	0.04219	0.04624
1797.57	0.04146	0.04268
1798.53	0.04334	0.03811
1799.49	0.04548	0.03421
1800.46	0.04553	0.03266
1801.42	0.04372	0.03368
1802.39	0.0411	0.03597
1803.35	0.03863	0.03961
1804.32	0.03755	0.04497
1805.28	0.03814	0.0513
1806.24	0.0403	0.05667
1807.21	0.04348	0.06017
1808.17	0.04554	0.06243
1809.14	0.04589	0.06406
1810.1	0.04633	0.06607
1811.07	0.04805	0.06912
1812.03	0.04975	0.07122
1812.99	0.05006	0.07037
1813.96	0.04802	0.06794
1814.92	0.04337	0.06538
1815.89	0.03754	0.06295
1816.85	0.03276	0.06102
1817.82	0.03019	0.05935
1818.78	0.03018	0.05762
1819.74	0.032	0.05537
1820.71	0.03387	0.05165
1821.67	0.03545	0.04657
1822.64	0.04053	0.04398
1823.6	0.04901	0.04466
1824.57	0.05579	0.04387
1825.53	0.05724	0.0395
1826.49	0.05397	0.03555
1827.46	0.04683	0.03552
1828.42	0.03815	0.03793
1829.39	0.03015	0.04147
1830.35	0.02338	0.04512
1831.32	0.01691	0.04653
1832.28	0.01068	0.04814
1833.24	0.00386	0.05351
1834.21	-0.00183	0.06181
1835.17	-0.00296	0.07038
1836.14	0.000628038	0.07811
1837.1	0.00601	0.0851
1838.07	0.01164	0.08994
1839.03	0.01595	0.09049
1839.99	0.01909	0.08637
1840.96	0.024	0.08022
1841.92	0.03224	0.07397
1842.89	0.0394	0.06857
1843.85	0.04208	0.06448
1844.81	0.04116	0.0619
1845.78	0.03859	0.06078
1846.74	0.03706	0.06067
1847.71	0.03871	0.05961
1848.67	0.04245	0.05777
1849.64	0.04611	0.05613
1850.6	0.0492	0.05511
1851.56	0.05274	0.05641
1852.53	0.05591	0.05938
1853.49	0.05733	0.0617
1854.46	0.05613	0.06266
1855.42	0.05116	0.06359
1856.38	0.04194	0.06462
1857.35	0.03093	0.06249
1858.31	0.02039	0.05625
1859.28	0.01239	0.05073
1860.24	0.00843	0.0505
1861.21	0.00613	0.05259
1862.17	0.00347	0.05456
1863.13	0.00164	0.05597
1864.1	0.00227	0.05616
1865.06	0.00668	0.05692
1866.03	0.01723	0.06166
1866.99	0.03021	0.06864
1867.96	0.04016	0.07523
1868.92	0.04556	0.07997
1869.88	0.0476	0.08149
1870.85	0.04773	0.0806
1871.81	0.04666	0.07978
1872.78	0.04458	0.07914
1873.74	0.04252	0.07691
1874.71	0.0409	0.07282
1875.67	0.03664	0.06846
1876.63	0.02928	0.06468
1877.6	0.02218	0.0619
1878.56	0.01817	0.06039
1879.53	0.01592	0.05654
1880.49	0.0136	0.04654
1881.45	0.01221	0.03472
1882.42	0.01321	0.02645
1883.38	0.01613	0.02209
1884.35	0.01954	0.02112
1885.31	0.02326	0.02199
1886.28	0.0259	0.02176
1887.24	0.02726	0.02054
1888.2	0.02806	0.0201
1889.17	0.02882	0.0209
1890.13	0.03013	0.02345
1891.1	0.03213	0.0285
1892.06	0.0333	0.03558
1893.03	0.0328	0.04344
1893.99	0.03054	0.04987
1894.95	0.02652	0.05517
1895.92	0.02461	0.05984
1896.88	0.02791	0.06357
1897.85	0.03313	0.06402
1898.81	0.03618	0.05964
1899.78	0.03775	0.05364
1900.74	0.039	0.05032
1901.7	0.04101	0.04921
1902.67	0.04556	0.04755
1903.63	0.04984	0.04296
1904.6	0.05256	0.03456
1905.56	0.05498	0.02587
1906.53	0.05989	0.02301
1907.49	0.06477	0.02578
1908.45	0.0643	0.0304
1909.42	0.0586	0.03346
1910.38	0.05073	0.03298
1911.35	0.0429	0.02998
1912.31	0.03655	0.02919
1913.28	0.03322	0.02992
1914.24	0.0343	0.03048
1915.2	0.03875	0.03054
1916.17	0.04031	0.03175
1917.13	0.03437	0.03355
1918.1	0.0256	0.03514
1919.06	0.01898	0.03697
1920.03	0.0166	0.03892
1920.99	0.02056	0.04027
1921.95	0.02617	0.04104
1922.92	0.02697	0.0409
1923.88	0.02501	0.04015
1924.85	0.0253	0.04041
1925.81	0.02795	0.04361
1926.77	0.02657	0.04891
1927.74	0.02092	0.05159
1928.7	0.01706	0.04797
1929.67	0.01724	0.03948
1930.63	0.02106	0.0337
1931.6	0.02647	0.034
1932.56	0.02992	0.0328
1933.52	0.03113	0.02675
1934.49	0.03049	0.02087
1935.45	0.02728	0.01956
1936.42	0.0257	0.02047
1937.38	0.02971	0.02086
1938.35	0.03535	0.02072
1939.31	0.03868	0.02058
1940.27	0.04027	0.02033
1941.24	0.03748	0.01973
1942.2	0.0325	0.01847
1943.17	0.02875	0.01549
1944.13	0.02846	0.01241
1945.1	0.03345	0.0137
1946.06	0.03901	0.01826
1947.02	0.04326	0.02
1947.99	0.04794	0.01798
1948.95	0.05706	0.01379
1949.92	0.0658	0.00983
1950.88	0.06672	0.00558
1951.84	0.06097	0.000703998
1952.81	0.05614	-0.00208
1953.77	0.05577	-0.000946723
1954.74	0.05745	0.00375
1955.7	0.05997	0.00886
1956.66	0.06226	0.01123
1957.63	0.06228	0.01062
1958.59	0.06072	0.01055
1959.56	0.06013	0.01209
1960.52	0.05935	0.0136
1961.49	0.05758	0.01442
1962.45	0.05439	0.0154
1963.41	0.05019	0.01712
1964.38	0.05016	0.01578
1965.34	0.05171	0.00849
1966.31	0.05232	-0.00117
1967.27	0.05137	-0.00881
1968.24	0.04888	-0.01532
1969.2	0.03809	-0.0199
1970.16	0.02364	-0.02127
1971.13	0.01569	-0.01941
1972.09	0.01574	-0.01541
1973.06	0.02085	-0.01018
1974.02	0.02764	-0.00541
1974.99	0.03557	-0.00447
1975.95	0.04478	-0.00708
1976.91	0.05465	-0.00875
1977.88	0.06308	-0.00659
1978.84	0.06861	-0.00199
1979.81	0.07018	0.00158
1980.77	0.06739	0.00219
1981.74	0.06188	1.64895e-05
1982.7	0.0583	-0.004
1983.66	0.06141	-0.01115
1984.63	0.06651	-0.01947
1985.59	0.06753	-0.02519
1986.56	0.06447	-0.0264
1987.52	0.06129	-0.02601
1988.48	0.05982	-0.02551
1989.45	0.06321	-0.02427
1990.41	0.07005	-0.02021
1991.38	0.07043	-0.01639
1992.34	0.07084	-0.01178
1993.31	0.07128	-0.00636
1994.27	0.07176	-0.00013346
1995.23	0.07228	0.0069
1996.2	0.07282	0.01472
1997.16	0.0734	0.02335
1998.13	0.07401	0.03279
1999.09	0.07466	0.04303
2000.06	0.07534	0.05407
