# Supplementary material
Source: Royal Society of Chemistry journal article supplement (doi:10.1039/d5nr04812e)
Supplement: d5nr04812e2.xlsx [file d5nr04812e2.xlsx]

## Sheet: Hoja1
Wavenumbers [1/cm]	GO Transmittance %	rGO Transmittance %
4500.08	99.9989	100.005
4499.6	100.001	100.001
4499.11	99.9998	99.9966
4498.63	99.996	99.9919
4498.15	99.9897	99.9869
4497.67	99.9816	99.9817
4497.18	99.9723	99.9758
4496.7	99.9628	99.9693
4496.22	99.9541	99.9624
4495.74	99.9473	99.9558
4495.26	99.9434	99.9507
4494.77	99.9427	99.9481
4494.29	99.9452	99.9486
4493.81	99.9502	99.9525
4493.33	99.9567	99.9593
4492.85	99.9637	99.9681
4492.36	99.9704	99.9776
4491.88	99.9763	99.9865
4491.4	99.9815	99.9937
4490.92	99.9861	99.9981
4490.44	99.9902	99.9992
4489.95	99.9938	99.997
4489.47	99.9964	99.9913
4488.99	99.9974	99.9829
4488.51	99.9959	99.9723
4488.02	99.9914	99.9605
4487.54	99.9835	99.9482
4487.06	99.9725	99.936
4486.58	99.9589	99.9245
4486.1	99.9437	99.9139
4485.61	99.928	99.9046
4485.13	99.9133	99.8969
4484.65	99.9005	99.8912
4484.17	99.8909	99.8879
4483.69	99.8849	99.8869
4483.2	99.8828	99.8878
4482.72	99.8842	99.8898
4482.24	99.8885	99.8916
4481.76	99.8944	99.8922
4481.27	99.9007	99.8908
4480.79	99.9061	99.8871
4480.31	99.9098	99.8819
4479.83	99.9113	99.876
4479.35	99.9106	99.8704
4478.86	99.9079	99.866
4478.38	99.904	99.8631
4477.9	99.8998	99.8619
4477.42	99.896	99.8625
4476.94	99.8934	99.8649
4476.45	99.8925	99.8694
4475.97	99.8934	99.8763
4475.49	99.896	99.8854
4475.01	99.9	99.896
4474.52	99.9047	99.9067
4474.04	99.9097	99.9153
4473.56	99.9145	99.92
4473.08	99.9187	99.9193
4472.6	99.9223	99.9131
4472.11	99.9248	99.9026
4471.63	99.9261	99.89
4471.15	99.9255	99.8776
4470.67	99.9226	99.8677
4470.19	99.9171	99.8614
4469.7	99.9091	99.8587
4469.22	99.8991	99.8585
4468.74	99.8884	99.8594
4468.26	99.8785	99.8601
4467.77	99.8709	99.8597
4467.29	99.8669	99.8581
4466.81	99.8671	99.8559
4466.33	99.8711	99.8537
4465.85	99.8781	99.8523
4465.36	99.8863	99.8518
4464.88	99.8943	99.8523
4464.4	99.9008	99.8535
4463.92	99.9049	99.8551
4463.44	99.9064	99.8569
4462.95	99.906	99.8588
4462.47	99.9042	99.8607
4461.99	99.9019	99.8622
4461.51	99.8994	99.8629
4461.03	99.8969	99.862
4460.54	99.894	99.859
4460.06	99.8904	99.8536
4459.58	99.8859	99.8461
4459.1	99.8805	99.8373
4458.61	99.8749	99.8287
4458.13	99.8699	99.8218
4457.65	99.8662	99.818
4457.17	99.8642	99.8177
4456.69	99.8639	99.8209
4456.2	99.8646	99.8265
4455.72	99.8656	99.8328
4455.24	99.866	99.8382
4454.76	99.8655	99.8415
4454.28	99.8641	99.842
4453.79	99.8626	99.8399
4453.31	99.8617	99.8361
4452.83	99.862	99.8314
4452.35	99.8639	99.827
4451.86	99.8671	99.8234
4451.38	99.871	99.8207
4450.9	99.8747	99.8187
4450.42	99.8778	99.8172
4449.94	99.8798	99.8159
4449.45	99.8803	99.8147
4448.97	99.8791	99.8135
4448.49	99.8758	99.8125
4448.01	99.8697	99.811
4447.53	99.8607	99.8087
4447.04	99.8488	99.8045
4446.56	99.8347	99.7976
4446.08	99.8197	99.788
4445.6	99.8058	99.7762
4445.12	99.7946	99.7638
4444.63	99.7878	99.753
4444.15	99.7859	99.7463
4443.67	99.789	99.7454
4443.19	99.7964	99.7511
4442.7	99.8072	99.7626
4442.22	99.8202	99.7779
4441.74	99.8346	99.7942
4441.26	99.8492	99.8086
4440.78	99.8633	99.819
4440.3	99.8758	99.8246
4439.81	99.8859	99.826
4439.33	99.8928	99.8246
4438.85	99.8964	99.8224
4438.37	99.8967	99.8209
4437.88	99.8946	99.821
4437.4	99.8911	99.8224
4436.92	99.887	99.8241
4436.44	99.883	99.8249
4435.96	99.8793	99.8236
4435.47	99.8755	99.8197
4434.99	99.8712	99.8133
4434.51	99.8661	99.8054
4434.03	99.8599	99.7968
4433.55	99.8527	99.7885
4433.06	99.845	99.7814
4432.58	99.8373	99.7758
4432.1	99.8301	99.7721
4431.62	99.8239	99.7703
4431.13	99.8194	99.7708
4430.65	99.8168	99.7736
4430.17	99.816	99.7786
4429.69	99.8169	99.7851
4429.21	99.8188	99.7922
4428.72	99.8209	99.7984
4428.24	99.8225	99.8024
4427.76	99.8232	99.8031
4427.28	99.8231	99.8001
4426.8	99.8226	99.7937
4426.31	99.8226	99.7848
4425.83	99.8235	99.7749
4425.35	99.8254	99.7655
4424.87	99.8278	99.758
4424.39	99.8296	99.7533
4423.9	99.83	99.752
4423.42	99.8285	99.7539
4422.94	99.8255	99.7585
4422.46	99.8224	99.7646
4421.97	99.8205	99.7706
4421.49	99.8212	99.7748
4421.01	99.8248	99.7758
4420.53	99.8308	99.7728
4420.05	99.8378	99.7659
4419.56	99.8444	99.7564
4419.08	99.8494	99.7461
4418.6	99.8526	99.7374
4418.12	99.8544	99.732
4417.64	99.8558	99.731
4417.15	99.8575	99.7344
4416.67	99.8596	99.7409
4416.19	99.8615	99.7487
4415.71	99.862	99.7556
4415.23	99.8599	99.7604
4414.74	99.8547	99.7623
4414.26	99.8469	99.7618
4413.78	99.8379	99.7597
4413.3	99.8295	99.7573
4412.81	99.8234	99.7557
4412.33	99.8209	99.7554
4411.85	99.8221	99.7562
4411.37	99.8265	99.7577
4410.89	99.8331	99.7588
4410.4	99.8407	99.7588
4409.92	99.848	99.7568
4409.44	99.854	99.7528
4408.96	99.8578	99.7468
4408.48	99.8588	99.7395
4407.99	99.8564	99.7318
4407.51	99.8502	99.7245
4407.03	99.8404	99.7183
4406.55	99.8277	99.7137
4406.06	99.8134	99.7109
4405.58	99.799	99.7094
4405.1	99.7863	99.7092
4404.62	99.7765	99.7095
4404.14	99.7703	99.7102
4403.65	99.7678	99.7107
4403.17	99.7681	99.711
4402.69	99.7705	99.7107
4402.21	99.7736	99.7097
4401.73	99.7767	99.708
4401.24	99.7794	99.7056
4400.76	99.7817	99.7028
4400.28	99.7844	99.7002
4399.8	99.7881	99.6982
4399.31	99.7936	99.6976
4398.83	99.8012	99.6987
4398.35	99.8105	99.7016
4397.87	99.8203	99.7059
4397.39	99.8292	99.7112
4396.9	99.8351	99.7166
4396.42	99.8369	99.7218
4395.94	99.8339	99.7262
4395.46	99.8267	99.7296
4394.98	99.817	99.7319
4394.49	99.8069	99.7328
4394.01	99.7987	99.7321
4393.53	99.7938	99.7294
4393.05	99.7927	99.7244
4392.56	99.7947	99.7172
4392.08	99.798	99.708
4391.6	99.8008	99.6973
4391.12	99.8011	99.6865
4390.64	99.7982	99.6767
4390.15	99.7921	99.6694
4389.67	99.7838	99.666
4389.19	99.775	99.6672
4388.71	99.7672	99.6733
4388.23	99.7616	99.6836
4387.74	99.7586	99.6966
4387.26	99.758	99.7102
4386.78	99.759	99.722
4386.3	99.7606	99.7295
4385.81	99.7618	99.7312
4385.33	99.7621	99.7264
4384.85	99.7615	99.7159
4384.37	99.7603	99.7013
4383.89	99.7595	99.6849
4383.4	99.7598	99.6694
4382.92	99.7619	99.6567
4382.44	99.7662	99.6481
4381.96	99.7727	99.6439
4381.48	99.7805	99.6437
4380.99	99.7889	99.6465
4380.51	99.7967	99.6513
4380.03	99.8027	99.6571
4379.55	99.806	99.6632
4379.07	99.8059	99.6694
4378.58	99.8023	99.6756
4378.1	99.7956	99.6817
4377.62	99.7866	99.6877
4377.14	99.7762	99.6933
4376.65	99.7655	99.6982
4376.17	99.7556	99.7018
4375.69	99.7472	99.7034
4375.21	99.7407	99.7028
4374.73	99.7359	99.6998
4374.24	99.7329	99.6948
4373.76	99.7311	99.6885
4373.28	99.7305	99.6818
4372.8	99.7308	99.6757
4372.32	99.7323	99.6705
4371.83	99.7353	99.6665
4371.35	99.74	99.6634
4370.87	99.7467	99.6609
4370.39	99.7551	99.6589
4369.91	99.765	99.6573
4369.42	99.7756	99.6567
4368.94	99.7859	99.6577
4368.46	99.7947	99.6607
4367.98	99.8013	99.6658
4367.49	99.805	99.6722
4367.01	99.8059	99.679
4366.53	99.8048	99.685
4366.05	99.8027	99.6892
4365.57	99.8009	99.6913
4365.08	99.8005	99.6915
4364.6	99.8021	99.6905
4364.12	99.8052	99.689
4363.64	99.8088	99.6876
4363.16	99.8112	99.6865
4362.67	99.8111	99.6856
4362.19	99.8073	99.6845
4361.71	99.7999	99.6828
4361.23	99.7895	99.6804
4360.74	99.7778	99.6771
4360.26	99.7663	99.6727
4359.78	99.7565	99.6671
4359.3	99.749	99.66
4358.82	99.7439	99.6518
4358.34	99.7406	99.6426
4357.85	99.7382	99.6334
4357.37	99.7362	99.625
4356.89	99.7342	99.6185
4356.41	99.7323	99.6142
4355.92	99.731	99.6121
4355.44	99.7305	99.6113
4354.96	99.7313	99.611
4354.48	99.7335	99.6103
4354	99.7372	99.6088
4353.51	99.7418	99.6068
4353.03	99.7468	99.6051
4352.55	99.7512	99.6046
4352.07	99.7544	99.606
4351.59	99.7554	99.6092
4351.1	99.7539	99.6136
4350.62	99.7503	99.6183
4350.14	99.7456	99.6227
4349.66	99.7414	99.6261
4349.18	99.7395	99.6288
4348.69	99.741	99.6309
4348.21	99.7461	99.633
4347.73	99.754	99.6353
4347.25	99.7625	99.6377
4346.76	99.7691	99.6399
4346.28	99.7718	99.6415
4345.8	99.7694	99.6421
4345.32	99.7624	99.6415
4344.84	99.7525	99.6395
4344.35	99.7421	99.6361
4343.87	99.7336	99.6312
4343.39	99.7285	99.6248
4342.91	99.7275	99.6173
4342.43	99.7299	99.6094
4341.94	99.7344	99.6022
4341.46	99.7397	99.5968
4340.98	99.7447	99.5942
4340.5	99.7486	99.5949
4340.01	99.7514	99.5983
4339.53	99.753	99.6035
4339.05	99.7534	99.609
4338.57	99.7525	99.6136
4338.09	99.75	99.6166
4337.6	99.7458	99.618
4337.12	99.74	99.618
4336.64	99.733	99.6175
4336.16	99.7255	99.6168
4335.68	99.7184	99.616
4335.19	99.7124	99.6149
4334.71	99.7083	99.6133
4334.23	99.7065	99.6109
4333.75	99.7072	99.6076
4333.27	99.71	99.6036
4332.78	99.7145	99.5989
4332.3	99.7201	99.5934
4331.82	99.7258	99.5869
4331.34	99.7305	99.5794
4330.85	99.7333	99.5713
4330.37	99.7334	99.5635
4329.89	99.7308	99.5577
4329.41	99.7254	99.5556
4328.93	99.7184	99.5587
4328.44	99.7106	99.5673
4327.96	99.7034	99.5804
4327.48	99.698	99.5957
4327	99.695	99.6105
4326.52	99.695	99.6218
4326.03	99.6981	99.628
4325.55	99.7037	99.6285
4325.07	99.7115	99.6246
4324.59	99.7205	99.6182
4324.1	99.7297	99.6116
4323.62	99.738	99.6068
4323.14	99.744	99.6046
4322.66	99.7468	99.6046
4322.18	99.7456	99.6057
4321.69	99.7402	99.6062
4321.21	99.731	99.6047
4320.73	99.7191	99.5999
4320.25	99.706	99.5919
4319.77	99.6936	99.5812
4319.28	99.6835	99.5693
4318.8	99.6769	99.5578
4318.32	99.6743	99.5485
4317.84	99.6754	99.5426
4317.35	99.6792	99.5406
4316.87	99.6841	99.542
4316.39	99.6888	99.546
4315.91	99.6923	99.5511
4315.43	99.6945	99.5563
4314.94	99.6957	99.5608
4314.46	99.6968	99.5646
4313.98	99.6991	99.5682
4313.5	99.7031	99.5724
4313.02	99.7091	99.5779
4312.53	99.7165	99.5852
4312.05	99.7243	99.5938
4311.57	99.7312	99.6028
4311.09	99.7361	99.6111
4310.6	99.7386	99.6173
4310.12	99.7388	99.6204
4309.64	99.7373	99.6203
4309.16	99.7349	99.617
4308.68	99.7326	99.6109
4308.19	99.7308	99.6031
4307.71	99.73	99.5945
4307.23	99.7305	99.5863
4306.75	99.7326	99.5796
4306.27	99.7364	99.575
4305.78	99.7417	99.5728
4305.3	99.7478	99.5726
4304.82	99.7538	99.5738
4304.34	99.7586	99.5753
4303.86	99.7613	99.5763
4303.37	99.7615	99.5764
4302.89	99.759	99.5756
4302.41	99.7544	99.5744
4301.93	99.7484	99.5736
4301.44	99.7416	99.5737
4300.96	99.7347	99.5753
4300.48	99.728	99.5784
4300	99.722	99.5823
4299.52	99.717	99.5859
4299.03	99.7134	99.5882
4298.55	99.7112	99.5879
4298.07	99.7108	99.5843
4297.59	99.7116	99.5773
4297.11	99.7133	99.5676
4296.62	99.715	99.5566
4296.14	99.7162	99.5458
4295.66	99.7163	99.5368
4295.18	99.7152	99.5307
4294.69	99.7133	99.5276
4294.21	99.7109	99.5269
4293.73	99.7085	99.5272
4293.25	99.7064	99.5272
4292.77	99.7047	99.5259
4292.28	99.7036	99.5231
4291.8	99.7028	99.5191
4291.32	99.7025	99.5153
4290.84	99.7024	99.5126
4290.36	99.7027	99.5116
4289.87	99.7032	99.5126
4289.39	99.7037	99.515
4288.91	99.7039	99.5179
4288.43	99.7035	99.5204
4287.95	99.7022	99.5219
4287.46	99.6997	99.5223
4286.98	99.696	99.5216
4286.5	99.6915	99.5201
4286.02	99.6865	99.5181
4285.53	99.682	99.516
4285.05	99.6786	99.5142
4284.57	99.6771	99.5131
4284.09	99.6777	99.5131
4283.61	99.6804	99.5148
4283.12	99.6843	99.5183
4282.64	99.6887	99.5234
4282.16	99.6927	99.5292
4281.68	99.6957	99.5348
4281.2	99.6974	99.539
4280.71	99.6983	99.5408
4280.23	99.6987	99.5399
4279.75	99.6992	99.5364
4279.27	99.6997	99.5309
4278.79	99.7001	99.5241
4278.3	99.6996	99.5174
4277.82	99.6981	99.5117
4277.34	99.6953	99.5081
4276.86	99.6919	99.5073
4276.38	99.6886	99.5096
4275.89	99.6864	99.5147
4275.41	99.6859	99.5214
4274.93	99.6875	99.5283
4274.45	99.6906	99.5334
4273.96	99.6951	99.5356
4273.48	99.7002	99.5342
4273	99.7059	99.53
4272.52	99.7119	99.5243
4272.04	99.7179	99.519
4271.55	99.7233	99.5155
4271.07	99.7271	99.5143
4270.59	99.728	99.5146
4270.11	99.7253	99.5148
4269.62	99.7189	99.5132
4269.14	99.71	99.5085
4268.66	99.7005	99.5007
4268.18	99.6927	99.4908
4267.7	99.6884	99.4808
4267.22	99.6884	99.4727
4266.73	99.6918	99.468
4266.25	99.6969	99.4672
4265.77	99.7015	99.4697
4265.29	99.704	99.4746
4264.8	99.7037	99.4805
4264.32	99.7013	99.4866
4263.84	99.6979	99.4922
4263.36	99.6952	99.4974
4262.88	99.6943	99.5022
4262.39	99.6957	99.5067
4261.91	99.699	99.5108
4261.43	99.7037	99.5145
4260.95	99.7088	99.5177
4260.47	99.7138	99.5205
4259.98	99.7182	99.5233
4259.5	99.7217	99.526
4259.02	99.7241	99.5287
4258.54	99.7254	99.5311
4258.06	99.7251	99.5326
4257.57	99.7235	99.5327
4257.09	99.7207	99.5313
4256.61	99.7171	99.5285
4256.13	99.7131	99.5248
4255.64	99.7087	99.5209
4255.16	99.7038	99.5174
4254.68	99.698	99.5146
4254.2	99.6908	99.5123
4253.72	99.6823	99.5102
4253.23	99.6729	99.5076
4252.75	99.6634	99.5042
4252.27	99.655	99.4999
4251.79	99.6484	99.4952
4251.31	99.6441	99.4907
4250.82	99.6419	99.4876
4250.34	99.6416	99.4869
4249.86	99.6427	99.4892
4249.38	99.6451	99.4946
4248.89	99.6488	99.5024
4248.41	99.6543	99.5115
4247.93	99.6619	99.5202
4247.45	99.6715	99.5271
4246.97	99.6828	99.531
4246.48	99.6947	99.5318
4246	99.7063	99.5298
4245.52	99.7164	99.526
4245.04	99.724	99.5217
4244.56	99.7284	99.518
4244.07	99.7292	99.5153
4243.59	99.7265	99.5138
4243.11	99.7208	99.5134
4242.63	99.713	99.5139
4242.15	99.7044	99.5154
4241.66	99.6965	99.5179
4241.18	99.6906	99.5218
4240.7	99.6875	99.5268
4240.22	99.6874	99.5321
4239.73	99.6895	99.5365
4239.25	99.6929	99.5389
4238.77	99.6963	99.5381
4238.29	99.6989	99.5341
4237.81	99.7001	99.5274
4237.32	99.7003	99.5196
4236.84	99.6998	99.5123
4236.36	99.6994	99.507
4235.88	99.6993	99.5042
4235.4	99.6998	99.5041
4234.91	99.701	99.5057
4234.43	99.7027	99.5083
4233.95	99.7049	99.511
4233.47	99.7074	99.5135
4232.98	99.7097	99.5156
4232.5	99.7114	99.5174
4232.02	99.7119	99.5189
4231.54	99.7106	99.5197
4231.06	99.7074	99.5192
4230.57	99.7029	99.5169
4230.09	99.6979	99.5128
4229.61	99.6939	99.5071
4229.13	99.6918	99.5005
4228.65	99.692	99.4941
4228.16	99.694	99.4888
4227.68	99.6969	99.4855
4227.2	99.6991	99.4844
4226.72	99.6994	99.4854
4226.23	99.6974	99.4882
4225.75	99.6931	99.4921
4225.27	99.6875	99.4961
4224.79	99.6814	99.4993
4224.31	99.6757	99.5008
4223.82	99.6712	99.5001
4223.34	99.6682	99.4971
4222.86	99.6667	99.4922
4222.38	99.6668	99.4861
4221.9	99.6686	99.4801
4221.41	99.6717	99.4752
4220.93	99.6761	99.4722
4220.45	99.6813	99.4717
4219.97	99.6866	99.4734
4219.48	99.6915	99.477
4219	99.6959	99.482
4218.52	99.6998	99.4878
4218.04	99.7036	99.4937
4217.56	99.7077	99.4993
4217.07	99.7125	99.5042
4216.59	99.7176	99.5078
4216.11	99.7226	99.51
4215.63	99.727	99.5107
4215.15	99.7301	99.5104
4214.66	99.732	99.5097
4214.18	99.7327	99.5095
4213.7	99.7326	99.5102
4213.22	99.7319	99.5118
4212.74	99.7304	99.5138
4212.25	99.7277	99.5153
4211.77	99.7235	99.5156
4211.29	99.7174	99.5141
4210.81	99.7098	99.5113
4210.32	99.7014	99.5077
4209.84	99.6935	99.5044
4209.36	99.6873	99.502
4208.88	99.6836	99.5008
4208.4	99.6829	99.5002
4207.91	99.6847	99.4996
4207.43	99.6883	99.4984
4206.95	99.6926	99.4966
4206.47	99.6963	99.4946
4205.99	99.6985	99.4937
4205.5	99.6986	99.4946
4205.02	99.6964	99.4978
4204.54	99.6924	99.5031
4204.06	99.6877	99.5094
4203.57	99.6835	99.5152
4203.09	99.6813	99.519
4202.61	99.6821	99.5202
4202.13	99.6865	99.5186
4201.65	99.6938	99.5151
4201.16	99.7028	99.5109
4200.68	99.7119	99.5069
4200.2	99.7194	99.5041
4199.72	99.7244	99.5023
4199.24	99.7265	99.5014
4198.75	99.7264	99.5007
4198.27	99.7248	99.4997
4197.79	99.7226	99.4982
4197.31	99.7204	99.4965
4196.83	99.7183	99.4947
4196.34	99.7162	99.4933
4195.86	99.7141	99.4923
4195.38	99.7119	99.4918
4194.9	99.7101	99.4912
4194.41	99.7093	99.4899
4193.93	99.71	99.4877
4193.45	99.7122	99.4843
4192.97	99.7157	99.4799
4192.49	99.7198	99.4751
4192.01	99.7239	99.4709
4191.52	99.7272	99.4679
4191.04	99.7292	99.4666
4190.56	99.7296	99.4671
4190.08	99.7282	99.4692
4189.59	99.7248	99.4722
4189.11	99.7198	99.4754
4188.63	99.7135	99.4784
4188.15	99.7069	99.4809
4187.67	99.7007	99.4829
4187.18	99.6962	99.4849
4186.7	99.694	99.4871
4186.22	99.6944	99.4897
4185.74	99.6972	99.4925
4185.26	99.7014	99.4952
4184.77	99.7059	99.4974
4184.29	99.71	99.4987
4183.81	99.713	99.4988
4183.33	99.7151	99.4978
4182.84	99.7165	99.4959
4182.36	99.7179	99.4937
4181.88	99.7198	99.4919
4181.4	99.7226	99.4913
4180.92	99.7262	99.4925
4180.43	99.7306	99.496
4179.95	99.735	99.5018
4179.47	99.7389	99.5095
4178.99	99.7415	99.5181
4178.51	99.742	99.5264
4178.02	99.7398	99.5332
4177.54	99.7349	99.5378
4177.06	99.7275	99.5396
4176.58	99.7185	99.539
4176.1	99.709	99.5363
4175.61	99.7001	99.5323
4175.13	99.6927	99.5275
4174.65	99.6872	99.5225
4174.17	99.6834	99.5174
4173.68	99.681	99.5124
4173.2	99.6795	99.5076
4172.72	99.6789	99.5033
4172.24	99.679	99.4993
4171.76	99.6803	99.4958
4171.27	99.6828	99.4925
4170.79	99.6866	99.4891
4170.31	99.6917	99.4857
4169.83	99.6977	99.4827
4169.35	99.7045	99.4809
4168.86	99.7117	99.4812
4168.38	99.7193	99.4843
4167.9	99.727	99.4904
4167.42	99.7343	99.499
4166.94	99.7404	99.5084
4166.45	99.7445	99.5169
4165.97	99.7462	99.5229
4165.49	99.7453	99.5255
4165.01	99.7425	99.525
4164.52	99.7392	99.5223
4164.04	99.7364	99.519
4163.56	99.7353	99.5164
4163.08	99.7363	99.5154
4162.6	99.7389	99.5161
4162.11	99.7424	99.5184
4161.63	99.7461	99.5217
4161.15	99.7496	99.5256
4160.67	99.7529	99.5299
4160.19	99.7561	99.5341
4159.7	99.7588	99.5377
4159.22	99.7606	99.54
4158.74	99.7601	99.54
4158.26	99.7565	99.5369
4157.77	99.7492	99.5305
4157.29	99.7388	99.5218
4156.81	99.7266	99.512
4156.33	99.715	99.5031
4155.85	99.7061	99.4967
4155.36	99.7016	99.4937
4154.88	99.7017	99.4942
4154.4	99.7059	99.4978
4153.92	99.7128	99.5033
4153.44	99.7208	99.5098
4152.95	99.7285	99.5166
4152.47	99.7349	99.5235
4151.99	99.7394	99.5296
4151.51	99.7416	99.5345
4151.02	99.7409	99.5372
4150.54	99.7372	99.5371
4150.06	99.7306	99.5337
4149.58	99.7218	99.5271
4149.1	99.7122	99.5183
4148.61	99.7035	99.5087
4148.13	99.6973	99.4997
4147.65	99.6944	99.4924
4147.17	99.6949	99.4873
4146.69	99.6978	99.4843
4146.2	99.7017	99.4832
4145.72	99.7052	99.4835
4145.24	99.7074	99.4852
4144.76	99.7079	99.4886
4144.27	99.7069	99.4935
4143.79	99.7049	99.4998
4143.31	99.7024	99.5071
4142.83	99.7001	99.5144
4142.35	99.6985	99.5209
4141.86	99.6982	99.5262
4141.38	99.6996	99.5299
4140.9	99.703	99.5324
4140.42	99.708	99.534
4139.94	99.7136	99.5351
4139.45	99.7185	99.5358
4138.97	99.7214	99.536
4138.49	99.7215	99.5356
4138.01	99.719	99.535
4137.52	99.7153	99.5343
4137.04	99.712	99.5341
4136.56	99.7108	99.5343
4136.08	99.7124	99.5347
4135.6	99.7159	99.5344
4135.11	99.7198	99.5324
4134.63	99.7219	99.5275
4134.15	99.7207	99.5197
4133.67	99.7155	99.5094
4133.19	99.7077	99.498
4132.7	99.699	99.4872
4132.22	99.6919	99.4785
4131.74	99.6879	99.4729
4131.26	99.6873	99.4704
4130.78	99.6896	99.4707
4130.29	99.6932	99.4726
4129.81	99.6965	99.4754
4129.33	99.6985	99.4784
4128.85	99.6986	99.4809
4128.36	99.6974	99.483
4127.88	99.6953	99.4847
4127.4	99.6932	99.4861
4126.92	99.6911	99.4877
4126.44	99.6892	99.4898
4125.95	99.687	99.4929
4125.47	99.6841	99.497
4124.99	99.6803	99.5019
4124.51	99.6754	99.5068
4124.03	99.6699	99.5109
4123.54	99.6642	99.5133
4123.06	99.6591	99.5136
4122.58	99.6557	99.5121
4122.1	99.6547	99.5098
4121.62	99.6565	99.5078
4121.13	99.6609	99.5071
4120.65	99.6673	99.5079
4120.17	99.6745	99.5096
4119.69	99.6813	99.5112
4119.2	99.6865	99.5114
4118.72	99.69	99.5097
4118.24	99.6917	99.506
4117.76	99.6922	99.5011
4117.28	99.6922	99.4963
4116.79	99.692	99.4925
4116.31	99.6915	99.4901
4115.83	99.6905	99.4892
4115.35	99.6885	99.4891
4114.87	99.6853	99.4891
4114.38	99.681	99.4887
4113.9	99.676	99.4878
4113.42	99.6705	99.4865
4112.94	99.665	99.485
4112.45	99.6595	99.4834
4111.97	99.6543	99.482
4111.49	99.6498	99.481
4111.01	99.6467	99.4805
4110.53	99.6458	99.4809
4110.05	99.6478	99.4824
4109.56	99.6526	99.4851
4109.08	99.6594	99.4883
4108.6	99.667	99.4911
4108.12	99.6736	99.4925
4107.63	99.6781	99.4916
4107.15	99.6802	99.4882
4106.67	99.6806	99.4831
4106.19	99.6805	99.4776
4105.71	99.6811	99.4736
4105.22	99.6828	99.4722
4104.74	99.685	99.4741
4104.26	99.6864	99.4792
4103.78	99.6858	99.4863
4103.3	99.6826	99.4945
4102.81	99.6775	99.5025
4102.33	99.6723	99.5096
4101.85	99.6688	99.5154
4101.37	99.6686	99.5194
4100.89	99.6718	99.5215
4100.4	99.6771	99.5214
4099.92	99.6824	99.5189
4099.44	99.6855	99.5145
4098.96	99.6852	99.5091
4098.47	99.6815	99.5039
4097.99	99.6756	99.5003
4097.51	99.6696	99.4987
4097.03	99.665	99.4993
4096.55	99.6627	99.501
4096.06	99.6623	99.5026
4095.58	99.6629	99.5027
4095.1	99.6631	99.5005
4094.62	99.6619	99.496
4094.14	99.6591	99.4899
4093.65	99.655	99.4834
4093.17	99.6503	99.4778
4092.69	99.6461	99.474
4092.21	99.643	99.4724
4091.72	99.6417	99.4731
4091.24	99.6423	99.4757
4090.76	99.6447	99.4796
4090.28	99.6483	99.4841
4089.8	99.6527	99.4884
4089.31	99.6569	99.492
4088.83	99.6601	99.4944
4088.35	99.6616	99.4951
4087.87	99.6611	99.4943
4087.39	99.6588	99.4923
4086.9	99.6552	99.4898
4086.42	99.6512	99.4873
4085.94	99.6471	99.485
4085.46	99.6436	99.483
4084.97	99.6404	99.481
4084.49	99.6376	99.4786
4084.01	99.635	99.4758
4083.53	99.6327	99.4727
4083.05	99.631	99.47
4082.56	99.6303	99.4682
4082.08	99.6307	99.4679
4081.6	99.6321	99.4693
4081.12	99.6338	99.4724
4080.64	99.6354	99.4769
4080.15	99.6361	99.4826
4079.67	99.6359	99.4893
4079.19	99.6349	99.4969
4078.71	99.6336	99.505
4078.22	99.6326	99.513
4077.74	99.6321	99.5203
4077.26	99.6323	99.5258
4076.78	99.6333	99.5289
4076.3	99.6351	99.5294
4075.81	99.6378	99.5276
4075.33	99.6414	99.5243
4074.85	99.6458	99.5204
4074.37	99.6506	99.5165
4073.89	99.655	99.5126
4073.4	99.6582	99.5086
4072.92	99.6595	99.504
4072.44	99.6587	99.4987
4071.96	99.656	99.4928
4071.47	99.6522	99.4871
4070.99	99.6478	99.4824
4070.51	99.6433	99.4793
4070.03	99.6383	99.4781
4069.55	99.6325	99.4785
4069.07	99.6254	99.4796
4068.58	99.617	99.4811
4068.1	99.608	99.4824
4067.62	99.5995	99.4837
4067.14	99.5931	99.4855
4066.65	99.5898	99.4881
4066.17	99.5902	99.4919
4065.69	99.5937	99.4966
4065.21	99.5992	99.5018
4064.73	99.6055	99.5069
4064.24	99.6113	99.5112
4063.76	99.6159	99.5143
4063.28	99.6189	99.516
4062.8	99.6206	99.5162
4062.32	99.621	99.5153
4061.83	99.6205	99.5133
4061.35	99.6194	99.511
4060.87	99.6179	99.509
4060.39	99.6163	99.5081
4059.91	99.6149	99.5091
4059.42	99.6137	99.5121
4058.94	99.6125	99.5166
4058.46	99.6111	99.5217
4057.98	99.6095	99.5261
4057.49	99.6075	99.5287
4057.01	99.606	99.5291
4056.53	99.6054	99.5273
4056.05	99.6066	99.5244
4055.57	99.6094	99.5213
4055.08	99.613	99.5188
4054.6	99.6157	99.5169
4054.12	99.6156	99.5154
4053.64	99.6112	99.5136
4053.16	99.6021	99.5112
4052.67	99.5891	99.5082
4052.19	99.5744	99.5053
4051.71	99.5603	99.5035
4051.23	99.549	99.5034
4050.74	99.5415	99.5053
4050.26	99.5377	99.5084
4049.78	99.5367	99.5118
4049.3	99.5375	99.5144
4048.82	99.5391	99.5158
4048.33	99.5412	99.5159
4047.85	99.5439	99.5151
4047.37	99.5474	99.5139
4046.89	99.5513	99.5125
4046.41	99.5553	99.5106
4045.92	99.5584	99.5077
4045.44	99.5601	99.5034
4044.96	99.5602	99.4978
4044.48	99.5593	99.4917
4043.99	99.5579	99.4864
4043.51	99.5569	99.4833
4043.03	99.5564	99.4833
4042.55	99.5561	99.4866
4042.07	99.5555	99.4924
4041.58	99.554	99.4994
4041.1	99.5515	99.5062
4040.62	99.5484	99.512
4040.14	99.5455	99.5161
4039.66	99.5432	99.5186
4039.17	99.5415	99.5196
4038.69	99.54	99.5197
4038.21	99.5379	99.5192
4037.73	99.5344	99.5184
4037.24	99.5293	99.5173
4036.76	99.5231	99.5161
4036.28	99.5167	99.5145
4035.8	99.5108	99.512
4035.32	99.5058	99.5082
4034.84	99.5015	99.5022
4034.35	99.4973	99.4936
4033.87	99.4924	99.4828
4033.39	99.4866	99.4704
4032.91	99.4804	99.4579
4032.42	99.4748	99.4474
4031.94	99.4708	99.4403
4031.46	99.4693	99.4378
4030.98	99.4706	99.4399
4030.49	99.4743	99.446
4030.01	99.4793	99.4545
4029.53	99.4848	99.4638
4029.05	99.4897	99.4727
4028.57	99.493	99.4797
4028.09	99.4941	99.4843
4027.6	99.4923	99.4859
4027.12	99.4874	99.4845
4026.64	99.4791	99.4804
4026.16	99.4683	99.4742
4025.67	99.4563	99.4673
4025.19	99.4451	99.4608
4024.71	99.4362	99.4561
4024.23	99.431	99.4539
4023.75	99.4292	99.4544
4023.26	99.4299	99.4566
4022.78	99.4312	99.4596
4022.3	99.4314	99.4621
4021.82	99.4298	99.4636
4021.34	99.4263	99.4643
4020.85	99.422	99.4646
4020.37	99.4184	99.4654
4019.89	99.4163	99.4674
4019.41	99.4162	99.4706
4018.93	99.4175	99.4746
4018.44	99.419	99.4785
4017.96	99.4197	99.4817
4017.48	99.4187	99.4838
4017	99.416	99.4848
4016.51	99.4117	99.485
4016.03	99.4065	99.4848
4015.55	99.4007	99.4843
4015.07	99.3945	99.4833
4014.59	99.388	99.4816
4014.1	99.3814	99.4791
4013.62	99.3753	99.476
4013.14	99.3704	99.4728
4012.66	99.3673	99.4702
4012.18	99.3665	99.4686
4011.69	99.3677	99.4681
4011.21	99.37	99.4681
4010.73	99.3722	99.4682
4010.25	99.373	99.4673
4009.76	99.3719	99.4652
4009.28	99.3684	99.4619
4008.8	99.3632	99.4578
4008.32	99.3574	99.4537
4007.84	99.3519	99.4501
4007.35	99.3479	99.4474
4006.87	99.3458	99.4456
4006.39	99.3455	99.4442
4005.91	99.3466	99.4429
4005.43	99.3481	99.4415
4004.94	99.3491	99.4402
4004.46	99.3485	99.4389
4003.98	99.3459	99.4381
4003.5	99.3413	99.4379
4003.01	99.3353	99.4384
4002.53	99.329	99.4392
4002.05	99.3237	99.4403
4001.57	99.3204	99.4413
4001.09	99.3196	99.4423
4000.6	99.3209	99.443
4000.12	99.3231	99.4436
3999.64	99.3249	99.4438
3999.16	99.3252	99.4437
3998.68	99.3234	99.443
3998.19	99.3195	99.4416
3997.71	99.3142	99.4394
3997.23	99.3085	99.4365
3996.75	99.303	99.4332
3996.26	99.2986	99.4298
3995.78	99.2956	99.427
3995.3	99.294	99.425
3994.82	99.2939	99.4243
3994.34	99.2952	99.4247
3993.86	99.2974	99.4259
3993.37	99.3001	99.4271
3992.89	99.3021	99.4275
3992.41	99.3023	99.4266
3991.93	99.2996	99.4241
3991.44	99.2937	99.4205
3990.96	99.2849	99.4166
3990.48	99.2744	99.4137
3990	99.264	99.413
3989.52	99.2554	99.4151
3989.03	99.2499	99.4199
3988.55	99.2482	99.4268
3988.07	99.2498	99.4341
3987.59	99.254	99.4403
3987.11	99.2597	99.4442
3986.62	99.2659	99.4451
3986.14	99.2718	99.4428
3985.66	99.2764	99.4379
3985.18	99.279	99.4311
3984.69	99.279	99.4234
3984.21	99.2759	99.4155
3983.73	99.2698	99.4081
3983.25	99.2614	99.402
3982.77	99.2517	99.3976
3982.28	99.2421	99.3954
3981.8	99.2341	99.3959
3981.32	99.2284	99.3995
3980.84	99.2253	99.4061
3980.36	99.2246	99.4151
3979.87	99.2253	99.4254
3979.39	99.2263	99.4358
3978.91	99.2268	99.4446
3978.43	99.2258	99.4507
3977.95	99.2229	99.4532
3977.46	99.2178	99.4516
3976.98	99.2105	99.4464
3976.5	99.2014	99.4383
3976.02	99.191	99.4285
3975.53	99.18	99.4183
3975.05	99.1692	99.4088
3974.57	99.1594	99.401
3974.09	99.1513	99.3955
3973.61	99.1454	99.3929
3973.12	99.1419	99.3935
3972.64	99.1409	99.3972
3972.16	99.1424	99.4038
3971.68	99.1458	99.4121
3971.2	99.1506	99.4209
3970.71	99.1554	99.4281
3970.23	99.1588	99.4319
3969.75	99.1593	99.4308
3969.27	99.1562	99.4246
3968.78	99.1495	99.4143
3968.3	99.1409	99.4021
3967.82	99.1325	99.3906
3967.34	99.1269	99.3827
3966.86	99.1258	99.3799
3966.37	99.1296	99.3825
3965.89	99.137	99.3893
3965.41	99.1455	99.3981
3964.93	99.152	99.4065
3964.45	99.1543	99.4122
3963.96	99.1508	99.4139
3963.48	99.1417	99.4112
3963	99.1286	99.4047
3962.52	99.1138	99.3958
3962.03	99.1002	99.3862
3961.55	99.0901	99.3778
3961.07	99.0851	99.3724
3960.59	99.0858	99.3709
3960.11	99.0916	99.3736
3959.62	99.1009	99.3796
3959.14	99.1118	99.3875
3958.66	99.1218	99.3952
3958.18	99.129	99.4007
3957.7	99.132	99.4027
3957.21	99.1303	99.4008
3956.73	99.1247	99.3959
3956.25	99.1167	99.3894
3955.77	99.1084	99.3832
3955.28	99.1012	99.3785
3954.8	99.0958	99.3759
3954.32	99.0918	99.3744
3953.84	99.0883	99.3729
3953.36	99.0841	99.3701
3952.88	99.0784	99.3651
3952.39	99.0714	99.358
3951.91	99.0635	99.3497
3951.43	99.0549	99.3411
3950.95	99.0457	99.3334
3950.46	99.0348	99.3267
3949.98	99.0211	99.3212
3949.5	99.0039	99.3162
3949.02	98.9838	99.3119
3948.54	98.9635	99.3089
3948.05	98.9474	99.3084
3947.57	98.9397	99.3119
3947.09	98.9428	99.3197
3946.61	98.9557	99.3308
3946.12	98.9746	99.3433
3945.64	98.9941	99.3543
3945.16	99.0092	99.3615
3944.68	99.0159	99.3632
3944.2	99.0121	99.3586
3943.71	98.9979	99.3481
3943.23	98.9761	99.3331
3942.75	98.9517	99.3168
3942.27	98.9314	99.3033
3941.79	98.9211	99.2963
3941.3	98.9231	99.2977
3940.82	98.9359	99.3067
3940.34	98.9546	99.3205
3939.86	98.9739	99.3355
3939.38	98.9894	99.3491
3938.89	98.9985	99.3589
3938.41	99.0008	99.3642
3937.93	98.9977	99.3653
3937.45	98.9919	99.3634
3936.97	98.9865	99.3603
3936.48	98.984	99.3576
3936	98.9851	99.3561
3935.52	98.9889	99.3555
3935.04	98.993	99.3546
3934.55	98.9946	99.3518
3934.07	98.9911	99.3453
3933.59	98.9809	99.3345
3933.11	98.9641	99.3197
3932.63	98.9429	99.3029
3932.14	98.9209	99.287
3931.66	98.9016	99.275
3931.18	98.8873	99.2686
3930.7	98.8782	99.2679
3930.22	98.8732	99.2716
3929.73	98.8716	99.2785
3929.25	98.8738	99.2879
3928.77	98.8809	99.2997
3928.29	98.8937	99.3141
3927.8	98.9114	99.3304
3927.32	98.9317	99.3472
3926.84	98.9507	99.3619
3926.36	98.9636	99.3714
3925.88	98.9662	99.3726
3925.39	98.956	99.3634
3924.91	98.9343	99.3442
3924.43	98.907	99.3188
3923.95	98.883	99.2939
3923.47	98.87	99.2757
3922.98	98.8706	99.2674
3922.5	98.8821	99.2688
3922.02	98.899	99.277
3921.54	98.9159	99.289
3921.05	98.9295	99.3022
3920.57	98.9383	99.3149
3920.09	98.9428	99.3261
3919.61	98.9442	99.3353
3919.13	98.944	99.3423
3918.64	98.9425	99.3465
3918.16	98.9389	99.3473
3917.68	98.9317	99.3437
3917.2	98.9203	99.3357
3916.72	98.9057	99.3248
3916.23	98.8916	99.3137
3915.75	98.8819	99.3058
3915.27	98.8794	99.3032
3914.79	98.8839	99.3064
3914.3	98.8932	99.3142
3913.82	98.9041	99.3247
3913.34	98.9139	99.3359
3912.86	98.9204	99.3462
3912.38	98.9226	99.3541
3911.89	98.92	99.3586
3911.41	98.9137	99.3596
3910.93	98.9056	99.3581
3910.45	98.8983	99.3553
3909.97	98.8938	99.3526
3909.48	98.893	99.3507
3909	98.895	99.349
3908.52	98.8978	99.3463
3908.04	98.8986	99.3412
3907.56	98.8953	99.3327
3907.07	98.8867	99.3204
3906.59	98.8731	99.3052
3906.11	98.8555	99.2882
3905.63	98.8354	99.2704
3905.14	98.8141	99.2526
3904.66	98.7934	99.2356
3904.18	98.7762	99.2211
3903.7	98.7669	99.2118
3903.22	98.769	99.2107
3902.74	98.7834	99.2189
3902.25	98.8071	99.2352
3901.77	98.835	99.2566
3901.29	98.8617	99.2792
3900.81	98.8823	99.2996
3900.32	98.8935	99.3142
3899.84	98.8933	99.3209
3899.36	98.8821	99.3194
3898.88	98.8634	99.312
3898.4	98.8424	99.3026
3897.91	98.8245	99.2954
3897.43	98.8127	99.2928
3896.95	98.808	99.2953
3896.47	98.8092	99.3019
3895.99	98.8143	99.3106
3895.5	98.8211	99.3193
3895.02	98.8276	99.3261
3894.54	98.8322	99.3297
3894.06	98.834	99.3298
3893.57	98.8327	99.3265
3893.09	98.8284	99.3202
3892.61	98.8208	99.3117
3892.13	98.8104	99.3022
3891.65	98.799	99.2938
3891.16	98.7913	99.2899
3890.68	98.7928	99.2944
3890.2	98.8052	99.3082
3889.72	98.8244	99.3278
3889.24	98.8425	99.3478
3888.75	98.8535	99.3644
3888.27	98.8569	99.3772
3887.79	98.8564	99.3882
3887.31	98.8563	99.3989
3886.82	98.8573	99.4076
3886.34	98.8559	99.4094
3885.86	98.8469	99.3994
3885.38	98.8312	99.3788
3884.9	98.817	99.356
3884.41	98.8116	99.34
3883.93	98.8133	99.3325
3883.45	98.8133	99.3295
3882.97	98.8051	99.3269
3882.49	98.7868	99.323
3882	98.7599	99.3174
3881.52	98.726	99.3089
3881.04	98.6869	99.2962
3880.56	98.6474	99.2797
3880.07	98.6185	99.264
3879.59	98.6122	99.2563
3879.11	98.6337	99.2604
3878.63	98.6764	99.2742
3878.15	98.7267	99.2913
3877.66	98.7722	99.3061
3877.18	98.8063	99.3162
3876.7	98.8281	99.3221
3876.22	98.8391	99.325
3875.74	98.8399	99.325
3875.25	98.8285	99.3197
3874.77	98.8022	99.306
3874.29	98.7617	99.2835
3873.81	98.7157	99.2575
3873.32	98.6776	99.2373
3872.84	98.6575	99.2306
3872.36	98.6568	99.2393
3871.88	98.6707	99.2608
3871.4	98.6917	99.2898
3870.91	98.711	99.3184
3870.43	98.7189	99.3369
3869.95	98.7111	99.3392
3869.47	98.6981	99.3303
3868.99	98.6999	99.3245
3868.5	98.7258	99.3314
3868.02	98.7645	99.3471
3867.54	98.7975	99.3623
3867.06	98.8146	99.3711
3866.58	98.8156	99.3727
3866.09	98.8039	99.3676
3865.61	98.7809	99.3547
3865.13	98.7462	99.3319
3864.65	98.7015	99.3001
3864.16	98.6543	99.2656
3863.68	98.6152	99.2373
3863.2	98.5913	99.2216
3862.72	98.5835	99.2192
3862.24	98.5888	99.2274
3861.76	98.6038	99.2424
3861.27	98.6264	99.2613
3860.79	98.6542	99.2818
3860.31	98.6839	99.3012
3859.83	98.7105	99.3163
3859.34	98.7287	99.3241
3858.86	98.7342	99.322
3858.38	98.7254	99.3091
3857.9	98.7036	99.2868
3857.42	98.6746	99.2594
3856.93	98.6484	99.2346
3856.45	98.6383	99.2225
3855.97	98.6579	99.2327
3855.49	98.7176	99.2716
3855.01	98.8183	99.3378
3854.52	98.9453	99.4184
3854.04	99.0634	99.4876
3853.56	99.127	99.5171
3853.08	99.1177	99.5018
3852.59	99.0695	99.4716
3852.11	99.0294	99.4587
3851.63	99.0066	99.4636
3851.15	98.9819	99.4679
3850.67	98.9408	99.4583
3850.18	98.8834	99.4331
3849.7	98.8188	99.3975
3849.22	98.7571	99.3579
3848.74	98.7061	99.3206
3848.26	98.6702	99.2899
3847.77	98.6505	99.269
3847.29	98.6457	99.2587
3846.81	98.6521	99.2581
3846.33	98.6648	99.2641
3845.84	98.6782	99.2727
3845.36	98.6868	99.2793
3844.88	98.6872	99.2804
3844.4	98.6786	99.275
3843.92	98.6644	99.265
3843.43	98.6502	99.2548
3842.95	98.6414	99.2485
3842.47	98.6395	99.2481
3841.99	98.6414	99.2519
3841.51	98.6412	99.2558
3841.02	98.6336	99.2562
3840.54	98.6169	99.2514
3840.06	98.5943	99.2427
3839.58	98.573	99.2336
3839.09	98.5629	99.2293
3838.61	98.5728	99.2345
3838.13	98.606	99.2513
3837.65	98.6576	99.2771
3837.17	98.7142	99.3051
3836.68	98.7604	99.3272
3836.2	98.7853	99.3383
3835.72	98.7872	99.338
3835.24	98.7722	99.3302
3834.76	98.7497	99.3204
3834.27	98.7283	99.3128
3833.79	98.7125	99.3091
3833.31	98.7027	99.3085
3832.83	98.6966	99.309
3832.35	98.6918	99.3084
3831.86	98.6874	99.3061
3831.38	98.6855	99.3035
3830.9	98.6887	99.3027
3830.42	98.6983	99.3051
3829.93	98.7114	99.3098
3829.45	98.7225	99.3144
3828.97	98.726	99.3164
3828.49	98.7184	99.3146
3828.01	98.6992	99.3088
3827.52	98.67	99.2996
3827.04	98.635	99.2879
3826.56	98.6004	99.2755
3826.08	98.574	99.2651
3825.6	98.5614	99.259
3825.11	98.564	99.2582
3824.63	98.5786	99.2625
3824.15	98.6014	99.2715
3823.67	98.6311	99.2862
3823.18	98.6678	99.3075
3822.7	98.7094	99.3338
3822.22	98.7462	99.3574
3821.74	98.7605	99.3653
3821.26	98.7374	99.3465
3820.78	98.6838	99.3062
3820.29	98.6315	99.2661
3819.81	98.6076	99.2449
3819.33	98.6123	99.2437
3818.85	98.6305	99.2533
3818.36	98.6502	99.2671
3817.88	98.6695	99.2844
3817.4	98.6906	99.3063
3816.92	98.7133	99.3313
3816.44	98.7331	99.3537
3815.95	98.7459	99.368
3815.47	98.7551	99.3744
3814.99	98.769	99.3778
3814.51	98.7888	99.3807
3814.03	98.8064	99.3806
3813.54	98.812	99.374
3813.06	98.8033	99.3615
3812.58	98.785	99.3469
3812.1	98.7641	99.3347
3811.61	98.7462	99.3274
3811.13	98.7338	99.325
3810.65	98.7271	99.3265
3810.17	98.7253	99.3307
3809.69	98.7282	99.3376
3809.2	98.7365	99.348
3808.72	98.7508	99.3628
3808.24	98.7695	99.3806
3807.76	98.7873	99.3971
3807.28	98.7979	99.4068
3806.79	98.799	99.4074
3806.31	98.7961	99.4028
3805.83	98.7957	99.3982
3805.35	98.797	99.3952
3804.86	98.7943	99.3915
3804.38	98.7844	99.3866
3803.9	98.7706	99.3826
3803.42	98.7592	99.3829
3802.94	98.7535	99.3871
3802.45	98.7497	99.3895
3801.97	98.7389	99.3813
3801.49	98.7191	99.3609
3801.01	98.7048	99.3403
3800.53	98.7147	99.3356
3800.04	98.7473	99.3483
3799.56	98.7813	99.3648
3799.08	98.7956	99.3706
3798.6	98.7831	99.3601
3798.11	98.7496	99.336
3797.63	98.706	99.3048
3797.15	98.6634	99.2732
3796.67	98.6309	99.2478
3796.19	98.6161	99.2345
3795.7	98.6231	99.2377
3795.22	98.6498	99.257
3794.74	98.6878	99.2869
3794.26	98.7261	99.3191
3793.78	98.7564	99.3471
3793.29	98.776	99.368
3792.81	98.7865	99.3816
3792.33	98.791	99.3892
3791.85	98.7925	99.3925
3791.37	98.793	99.3932
3790.88	98.7935	99.3928
3790.4	98.7948	99.3931
3789.92	98.7974	99.3954
3789.44	98.8019	99.4003
3788.95	98.8081	99.4074
3788.47	98.8153	99.4151
3787.99	98.8219	99.4208
3787.51	98.8257	99.422
3787.03	98.8248	99.4167
3786.54	98.8175	99.4039
3786.06	98.8035	99.3847
3785.58	98.7836	99.3612
3785.1	98.7605	99.3369
3784.62	98.7385	99.3164
3784.13	98.7232	99.3041
3783.65	98.7192	99.3026
3783.17	98.7274	99.3114
3782.69	98.7451	99.3272
3782.2	98.7674	99.3455
3781.72	98.7895	99.3624
3781.24	98.8072	99.3743
3780.76	98.8159	99.378
3780.28	98.8113	99.3708
3779.8	98.7918	99.3524
3779.31	98.762	99.3274
3778.83	98.7333	99.3052
3778.35	98.7181	99.2951
3777.87	98.7226	99.3014
3777.38	98.7444	99.3218
3776.9	98.7762	99.3505
3776.42	98.8103	99.3811
3775.94	98.8411	99.409
3775.46	98.8653	99.431
3774.97	98.8821	99.4459
3774.49	98.892	99.4541
3774.01	98.8967	99.4567
3773.53	98.8977	99.4555
3773.05	98.8961	99.452
3772.56	98.8922	99.4469
3772.08	98.8852	99.4401
3771.6	98.874	99.4306
3771.12	98.857	99.417
3770.64	98.8341	99.3985
3770.15	98.8078	99.3768
3769.67	98.7849	99.3564
3769.19	98.7738	99.3437
3768.71	98.7785	99.3423
3768.22	98.796	99.3505
3767.74	98.8181	99.3631
3767.26	98.837	99.3746
3766.78	98.8492	99.382
3766.3	98.8544	99.384
3765.81	98.8544	99.3809
3765.33	98.8518	99.3742
3764.85	98.8503	99.3673
3764.37	98.8533	99.3638
3763.89	98.8614	99.3658
3763.4	98.8719	99.3725
3762.92	98.8814	99.382
3762.44	98.8886	99.393
3761.96	98.8941	99.4046
3761.47	98.8979	99.4151
3760.99	98.8978	99.4211
3760.51	98.8896	99.4186
3760.03	98.8709	99.4054
3759.55	98.8441	99.3842
3759.06	98.8172	99.3616
3758.58	98.7986	99.3451
3758.1	98.7937	99.339
3757.62	98.8021	99.3435
3757.14	98.8194	99.3555
3756.65	98.8394	99.3706
3756.17	98.8568	99.3855
3755.69	98.8692	99.3989
3755.21	98.8782	99.4119
3754.72	98.8883	99.4269
3754.24	98.9051	99.4464
3753.76	98.932	99.4704
3753.28	98.968	99.4953
3752.8	99.0064	99.5143
3752.31	99.0368	99.5205
3751.83	99.0505	99.5114
3751.35	99.0467	99.493
3750.87	99.0332	99.4782
3750.39	99.0224	99.4792
3749.9	99.0237	99.5006
3749.42	99.039	99.5366
3748.94	99.061	99.5744
3748.46	99.077	99.6009
3747.97	99.0771	99.609
3747.49	99.0606	99.601
3747.01	99.0375	99.5871
3746.53	99.0241	99.5809
3746.05	99.0364	99.593
3745.57	99.0825	99.627
3745.08	99.1581	99.6764
3744.6	99.249	99.7287
3744.12	99.3425	99.7756
3743.64	99.4305	99.8154
3743.15	99.4974	99.8418
3742.67	99.5215	99.843
3742.19	99.4936	99.8134
3741.71	99.4259	99.7601
3741.22	99.3419	99.6971
3740.74	99.2646	99.6374
3740.26	99.2101	99.5896
3739.78	99.1853	99.5581
3739.3	99.1904	99.5437
3738.82	99.2217	99.5466
3738.33	99.2733	99.5663
3737.85	99.339	99.6019
3737.37	99.4101	99.6503
3736.89	99.4746	99.7044
3736.4	99.5172	99.7536
3735.92	99.526	99.787
3735.44	99.5028	99.8001
3734.96	99.4664	99.7991
3734.48	99.4407	99.7956
3733.99	99.4395	99.7981
3733.51	99.4627	99.8091
3733.03	99.5033	99.8276
3732.55	99.554	99.8519
3732.07	99.6095	99.8804
3731.58	99.6654	99.9112
3731.1	99.7169	99.9411
3730.62	99.7594	99.9668
3730.14	99.7898	99.9854
3729.66	99.8076	99.9966
3729.17	99.816	100.002
3728.69	99.8195	100.003
3728.21	99.8215	100.002
3727.73	99.8225	99.9973
3727.24	99.8204	99.9883
3726.76	99.8121	99.9733
3726.28	99.7971	99.9544
3725.8	99.7783	99.9362
3725.32	99.7598	99.9239
3724.83	99.7441	99.9193
3724.35	99.7305	99.9207
3723.87	99.7169	99.9235
3723.39	99.7017	99.9231
3722.91	99.6851	99.9162
3722.42	99.6692	99.9026
3721.94	99.657	99.885
3721.46	99.6505	99.8675
3720.98	99.6485	99.8538
3720.49	99.6464	99.8448
3720.01	99.6384	99.8389
3719.53	99.6201	99.833
3719.05	99.5901	99.8243
3718.57	99.5512	99.811
3718.08	99.5084	99.793
3717.6	99.4677	99.7714
3717.12	99.433	99.748
3716.64	99.4056	99.7245
3716.16	99.3845	99.7023
3715.67	99.3682	99.6829
3715.19	99.3568	99.6684
3714.71	99.3519	99.661
3714.23	99.356	99.6625
3713.74	99.3708	99.6736
3713.26	99.3952	99.6927
3712.78	99.4241	99.7159
3712.3	99.4493	99.7373
3711.82	99.4642	99.7525
3711.33	99.4684	99.761
3710.85	99.4705	99.7672
3710.37	99.4833	99.7779
3709.89	99.5161	99.7977
3709.41	99.5695	99.8267
3708.92	99.6366	99.8613
3708.44	99.7064	99.896
3707.96	99.7688	99.9258
3707.48	99.8161	99.9471
3706.99	99.8453	99.9582
3706.51	99.8575	99.9598
3706.03	99.8578	99.9546
3705.55	99.8532	99.9461
3705.07	99.8506	99.9383
3704.59	99.8548	99.9338
3704.1	99.8674	99.9337
3703.62	99.8866	99.937
3703.14	99.9082	99.9418
3702.66	99.9268	99.9454
3702.17	99.9388	99.9464
3701.69	99.9442	99.9458
3701.21	99.9475	99.9466
3700.73	99.9543	99.952
3700.25	99.9668	99.9624
3699.76	99.9828	99.9753
3699.28	99.9969	99.9871
3698.8	100.005	99.995
3698.32	100.006	99.9983
3697.84	100.001	99.998
3697.35	99.9908	99.9952
3696.87	99.9776	99.9907
3696.39	99.962	99.9847
3695.91	99.9445	99.9772
3695.42	99.9262	99.9684
3694.94	99.9087	99.9592
3694.46	99.894	99.9507
3693.98	99.8834	99.9438
3693.5	99.8774	99.9389
3693.01	99.8744	99.9348
3692.53	99.8704	99.9286
3692.05	99.86	99.9167
3691.57	99.8378	99.8958
3691.09	99.802	99.8656
3690.6	99.7563	99.8293
3690.12	99.7098	99.7943
3689.64	99.6746	99.7694
3689.16	99.6626	99.7624
3688.68	99.681	99.7774
3688.19	99.7292	99.8122
3687.71	99.7957	99.8578
3687.23	99.8612	99.9005
3686.75	99.9076	99.9287
3686.26	99.9251	99.9371
3685.78	99.9156	99.928
3685.3	99.8881	99.9082
3684.82	99.8539	99.8852
3684.34	99.8222	99.8645
3683.85	99.7983	99.8488
3683.37	99.7833	99.8382
3682.89	99.7761	99.8318
3682.41	99.7744	99.8284
3681.93	99.7754	99.8265
3681.44	99.7764	99.8248
3680.96	99.774	99.821
3680.48	99.7645	99.8122
3680	99.7447	99.7956
3679.51	99.7143	99.7708
3679.03	99.6783	99.741
3678.55	99.6451	99.7129
3678.07	99.6249	99.6943
3677.59	99.6246	99.6905
3677.1	99.645	99.7022
3676.62	99.6752	99.7217
3676.14	99.6922	99.733
3675.66	99.6724	99.7204
3675.18	99.6219	99.6889
3674.69	99.5835	99.6668
3674.21	99.5908	99.6753
3673.73	99.6324	99.7061
3673.25	99.6771	99.7396
3672.76	99.7073	99.7652
3672.28	99.7232	99.7839
3671.8	99.7319	99.7993
3671.32	99.7362	99.8109
3670.84	99.73	99.8118
3670.35	99.7033	99.7933
3669.87	99.6553	99.7549
3669.39	99.6023	99.7103
3668.91	99.5669	99.6779
3668.43	99.5575	99.6659
3667.94	99.5647	99.669
3667.46	99.5745	99.6772
3666.98	99.5779	99.6841
3666.5	99.5734	99.6879
3666.01	99.5632	99.6895
3665.53	99.5504	99.6903
3665.05	99.5368	99.691
3664.57	99.5233	99.6917
3664.09	99.5098	99.6919
3663.61	99.4964	99.6914
3663.12	99.4831	99.6902
3662.64	99.47	99.6886
3662.16	99.4566	99.6869
3661.68	99.4423	99.6851
3661.19	99.4261	99.6826
3660.71	99.4072	99.6789
3660.23	99.3858	99.6736
3659.75	99.3631	99.6674
3659.27	99.3414	99.6615
3658.78	99.3226	99.6576
3658.3	99.3079	99.6569
3657.82	99.2962	99.6592
3657.34	99.2836	99.662
3656.86	99.2654	99.6616
3656.37	99.239	99.6549
3655.89	99.2081	99.6429
3655.41	99.1807	99.63
3654.93	99.1624	99.62
3654.44	99.151	99.6127
3653.96	99.1398	99.6055
3653.48	99.1233	99.5966
3653	99.1	99.5859
3652.52	99.0708	99.5737
3652.03	99.0361	99.5588
3651.55	98.9926	99.5375
3651.07	98.9346	99.5043
3650.59	98.8572	99.456
3650.11	98.7634	99.3964
3649.62	98.6654	99.3375
3649.14	98.5785	99.2925
3648.66	98.5107	99.2674
3648.18	98.4602	99.2588
3647.7	98.4233	99.2609
3647.21	98.4004	99.2709
3646.73	98.3944	99.2892
3646.25	98.4057	99.3157
3645.77	98.4288	99.3474
3645.28	98.4548	99.3794
3644.8	98.4755	99.407
3644.32	98.4856	99.4268
3643.84	98.4826	99.4375
3643.36	98.467	99.4391
3642.87	98.4404	99.4331
3642.39	98.4065	99.422
3641.91	98.3705	99.4095
3641.43	98.3375	99.3991
3640.95	98.3109	99.3931
3640.46	98.2913	99.3914
3639.98	98.2761	99.3918
3639.5	98.2618	99.3915
3639.02	98.2448	99.3886
3638.53	98.2236	99.3825
3638.05	98.1991	99.3744
3637.57	98.1739	99.3665
3637.09	98.1506	99.3611
3636.61	98.131	99.3588
3636.12	98.1141	99.359
3635.64	98.0975	99.3596
3635.16	98.0776	99.3582
3634.68	98.0517	99.3531
3634.2	98.0195	99.3443
3633.71	97.9842	99.3341
3633.23	97.9521	99.3267
3632.75	97.93	99.3264
3632.27	97.9223	99.3367
3631.78	97.9303	99.3589
3631.3	97.9516	99.3927
3630.82	97.9804	99.4355
3630.34	98.0045	99.4803
3629.86	98.0045	99.514
3629.37	97.96	99.5212
3628.89	97.87	99.4968
3628.41	97.7688	99.4576
3627.93	97.7029	99.4298
3627.45	97.6855	99.4226
3626.96	97.6924	99.4244
3626.48	97.6939	99.4205
3626	97.6759	99.4052
3625.52	97.6402	99.3812
3625.03	97.5959	99.354
3624.55	97.5521	99.3283
3624.07	97.5144	99.3062
3623.59	97.4838	99.2877
3623.11	97.4584	99.2711
3622.62	97.4351	99.2549
3622.14	97.4105	99.2375
3621.66	97.382	99.2177
3621.18	97.3467	99.1939
3620.7	97.3016	99.1638
3620.21	97.2436	99.1254
3619.73	97.1714	99.0785
3619.25	97.0883	99.0264
3618.77	97.0032	98.9763
3618.29	96.9274	98.936
3617.8	96.8684	98.9097
3617.32	96.8266	98.8961
3616.84	96.7959	98.8896
3616.36	96.7677	98.8841
3615.88	96.7347	98.8747
3615.39	96.6917	98.859
3614.91	96.6358	98.836
3614.43	96.5669	98.8061
3613.95	96.4886	98.7715
3613.47	96.4103	98.7369
3612.98	96.346	98.71
3612.5	96.3101	98.6984
3612.02	96.3092	98.706
3611.54	96.34	98.731
3611.05	96.3917	98.7677
3610.57	96.451	98.8088
3610.09	96.5062	98.8476
3609.61	96.5476	98.8779
3609.13	96.5677	98.8945
3608.64	96.5627	98.8945
3608.16	96.5345	98.8791
3607.68	96.4916	98.8542
3607.2	96.4466	98.8282
3606.72	96.4108	98.8091
3606.23	96.3908	98.8008
3605.75	96.3881	98.8038
3605.27	96.3999	98.8156
3604.79	96.4213	98.8327
3604.3	96.4464	98.8508
3603.82	96.469	98.8663
3603.34	96.4838	98.8762
3602.86	96.4867	98.8784
3602.38	96.4762	98.8723
3601.89	96.4526	98.8589
3601.41	96.4191	98.8399
3600.93	96.38	98.8184
3600.45	96.3404	98.7973
3599.97	96.3044	98.7791
3599.48	96.2744	98.7651
3599	96.251	98.755
3598.52	96.2333	98.7479
3598.04	96.2204	98.7426
3597.55	96.211	98.738
3597.07	96.204	98.7334
3596.59	96.1978	98.7286
3596.11	96.1904	98.7234
3595.63	96.1801	98.718
3595.14	96.1661	98.7129
3594.66	96.1494	98.7087
3594.18	96.1327	98.7061
3593.7	96.1198	98.7056
3593.22	96.1135	98.7069
3592.73	96.1151	98.7091
3592.25	96.1234	98.7111
3591.77	96.1364	98.7121
3591.29	96.1516	98.712
3590.8	96.167	98.7113
3590.32	96.1805	98.7102
3589.84	96.1883	98.7076
3589.36	96.1846	98.7008
3588.88	96.1611	98.6854
3588.39	96.1103	98.6571
3587.91	96.031	98.6152
3587.43	95.9352	98.566
3586.95	95.8462	98.5222
3586.47	95.7879	98.4961
3585.98	95.7706	98.4918
3585.5	95.7876	98.5044
3585.02	95.8229	98.5241
3584.54	95.8608	98.5425
3584.05	95.8912	98.5544
3583.57	95.9097	98.5583
3583.09	95.9167	98.5551
3582.61	95.915	98.5467
3582.13	95.908	98.5354
3581.64	95.8986	98.523
3581.16	95.8886	98.5104
3580.68	95.8781	98.4982
3580.2	95.8672	98.4862
3579.72	95.8561	98.4751
3579.23	95.8457	98.4655
3578.75	95.8378	98.4583
3578.27	95.8335	98.4545
3577.79	95.8329	98.4541
3577.31	95.8343	98.4561
3576.82	95.8349	98.4591
3576.34	95.8316	98.4608
3575.86	95.8227	98.4598
3575.38	95.8087	98.4557
3574.89	95.7922	98.4488
3574.41	95.7769	98.4405
3573.93	95.7664	98.4323
3573.45	95.7626	98.4251
3572.97	95.7655	98.4195
3572.49	95.7736	98.4153
3572	95.785	98.4125
3571.52	95.7983	98.4111
3571.04	95.8128	98.4112
3570.56	95.8282	98.4132
3570.07	95.8436	98.4165
3569.59	95.8565	98.4196
3569.11	95.8618	98.4193
3568.63	95.8518	98.4105
3568.15	95.8181	98.3872
3567.66	95.7558	98.3457
3567.18	95.6703	98.2885
3566.7	95.5797	98.2264
3566.22	95.5085	98.1747
3565.74	95.474	98.1449
3565.25	95.4778	98.1391
3564.77	95.5088	98.1517
3564.29	95.5525	98.1748
3563.81	95.5972	98.2018
3563.32	95.6362	98.2286
3562.84	95.6663	98.2528
3562.36	95.6871	98.273
3561.88	95.6988	98.2882
3561.4	95.7026	98.2979
3560.91	95.7004	98.3025
3560.43	95.695	98.3029
3559.95	95.6893	98.301
3559.47	95.6863	98.2984
3558.99	95.6875	98.2964
3558.5	95.693	98.2955
3558.02	95.7014	98.2952
3557.54	95.7106	98.2951
3557.06	95.7191	98.2947
3556.57	95.7261	98.2943
3556.09	95.7319	98.2945
3555.61	95.7373	98.2956
3555.13	95.7421	98.2973
3554.65	95.7449	98.2978
3554.16	95.7428	98.2942
3553.68	95.7322	98.2835
3553.2	95.7105	98.2637
3552.72	95.6785	98.2354
3552.24	95.6412	98.2026
3551.75	95.6071	98.1721
3551.27	95.5847	98.1505
3550.79	95.5792	98.1418
3550.31	95.59	98.1459
3549.82	95.6117	98.1592
3549.34	95.637	98.1766
3548.86	95.659	98.193
3548.38	95.6728	98.2046
3547.9	95.6755	98.2091
3547.41	95.6669	98.2058
3546.93	95.6487	98.1958
3546.45	95.624	98.181
3545.97	95.5963	98.1639
3545.49	95.569	98.147
3545	95.5449	98.1324
3544.52	95.5269	98.122
3544.04	95.5172	98.1174
3543.56	95.5174	98.1196
3543.08	95.5279	98.1289
3542.59	95.5468	98.1438
3542.11	95.5708	98.1621
3541.63	95.596	98.1803
3541.15	95.6192	98.1957
3540.66	95.6382	98.2058
3540.18	95.6529	98.2099
3539.7	95.6641	98.2083
3539.22	95.6728	98.2019
3538.74	95.6791	98.1923
3538.25	95.6819	98.1803
3537.77	95.6793	98.1667
3537.29	95.6698	98.1522
3536.81	95.6534	98.1377
[truncated: 6,506 more rows]
