# Supplementary material
Source: Royal Society of Chemistry journal article supplement (doi:10.1039/d5nr04812e)
Supplement: d5nr04812e3.xlsx [file d5nr04812e3.xlsx]

## Sheet: Hoja1
	Si wafer	HbA1c	Hb0
200	0.09668	-0.04733	-0.03819
200.964	0.09668	-0.00788	-0.00758
201.928	0.09668	0.03119	0.02635
202.892	0.09345	0.06958	0.064
203.856	0.08997	0.11097	0.10003
204.821	0.08651	0.1577	0.13311
205.785	0.0859	0.20593	0.16584
206.749	0.08325	0.25658	0.19931
207.713	0.07724	0.30292	0.23322
208.677	0.07523	0.33356	0.2692
209.641	0.07531	0.3902	0.33292
210.605	0.0754	0.41837	0.35478
211.569	0.07549	0.4485	0.38657
212.533	0.07559	0.4796	0.42383
213.498	0.0739	0.51216	0.44508
214.462	0.0722	0.54572	0.45336
215.426	0.0708	0.58105	0.4719
216.39	0.06746	0.61855	0.50211
217.354	0.06544	0.64441	0.52762
218.318	0.06565	0.65231	0.54513
219.282	0.0659	0.66355	0.56264
220.246	0.06707	0.68746	0.58265
221.21	0.07015	0.70912	0.60141
222.175	0.07122	0.7153	0.61471
223.139	0.07472	0.71913	0.62495
224.103	0.07566	0.73552	0.6303
225.067	0.07975	0.75713	0.63366
226.031	0.08387	0.77312	0.63902
226.995	0.08799	0.78519	0.64592
227.959	0.08865	0.79374	0.65579
228.923	0.08931	0.79913	0.6683
229.888	0.08676	0.80879	0.68432
230.852	0.08703	0.8232	0.70423
231.816	0.08475	0.83681	0.71891
232.78	0.08193	0.84904	0.72553
233.744	0.08181	0.85947	0.73131
234.708	0.07737	0.8665	0.73721
235.672	0.07351	0.87369	0.74192
236.636	0.06479	0.89423	0.74786
237.6	0.06287	0.8975	0.76079
238.565	0.06358	0.89928	0.77569
239.529	0.0643	0.9035	0.78195
240.493	0.06502	0.91027	0.78566
241.457	0.06575	0.93091	0.80574
242.421	0.06649	0.96027	0.83614
243.385	0.06724	0.97777	0.85289
244.349	0.06673	0.9845	0.8572
245.313	0.06514	1.00052	0.86713
246.277	0.06591	1.02824	0.88414
247.242	0.06756	1.05203	0.9023
248.206	0.07108	1.06857	0.92222
249.17	0.07185	1.07748	0.93635
250.134	0.07213	1.07006	0.93662
251.098	0.06977	1.07028	0.9416
252.062	0.07034	1.10519	0.97012
253.026	0.06775	1.14434	1.00072
253.99	0.06858	1.16403	1.01388
254.954	0.0625	1.17726	1.0219
255.919	0.0597	1.19139	1.03662
256.883	0.05706	1.2064	1.05441
257.847	0.05443	1.23981	1.08011
258.811	0.05475	1.28369	1.11027
259.775	0.05564	1.30455	1.12227
260.739	0.05654	1.30915	1.12143
261.703	0.05748	1.3156	1.13012
262.667	0.05843	1.32477	1.1485
263.631	0.05576	1.37273	1.20186
264.596	0.05672	1.39009	1.21692
265.56	0.05971	1.38882	1.21168
266.524	0.06227	1.3934	1.207
267.488	0.06323	1.41803	1.2133
268.452	0.0642	1.44176	1.22228
269.416	0.06517	1.44683	1.22848
270.38	0.06614	1.44365	1.2316
271.344	0.06713	1.44225	1.2296
272.309	0.06813	1.44369	1.22789
273.273	0.06816	1.45167	1.23905
274.237	0.06568	1.46325	1.25757
275.201	0.0632	1.46689	1.26171
276.165	0.0607	1.46204	1.25002
277.129	0.05866	1.45621	1.23368
278.093	0.05963	1.45001	1.21224
279.057	0.06081	1.45208	1.2038
280.021	0.06521	1.46967	1.22066
280.986	0.06619	1.47808	1.23372
281.95	0.06719	1.4597	1.23582
282.914	0.06819	1.44524	1.23604
283.878	0.06919	1.45092	1.22697
284.842	0.07019	1.45424	1.21917
285.806	0.0712	1.42602	1.22997
286.77	0.0722	1.3976	1.24084
287.734	0.0732	1.43124	1.23962
288.698	0.07421	1.46773	1.23785
289.663	0.07521	1.47919	1.24729
290.627	0.07622	1.47019	1.24319
291.591	0.07722	1.4462	1.21939
292.555	0.08023	1.42296	1.208
293.519	0.08474	1.40028	1.20168
294.483	0.08926	1.37216	1.18033
295.447	0.09379	1.34113	1.15038
296.411	0.09983	1.31542	1.11867
297.375	0.10924	1.29401	1.08673
298.34	0.11833	1.26432	1.05627
299.304	0.12399	1.22588	1.02729
300.268	0.13107	1.18663	0.99928
301.232	0.13396	1.14912	0.97201
302.196	0.13153	1.12123	0.9483
303.16	0.12853	1.10722	0.92971
304.124	0.12306	1.09527	0.9188
305.088	0.12033	1.07733	0.91904
306.052	0.11462	1.05286	0.91736
307.017	0.11217	1.0187	0.89867
307.981	0.10631	0.98734	0.87534
308.945	0.10045	0.98176	0.86599
309.909	0.09791	0.9915	0.86507
310.873	0.09559	0.99841	0.86317
311.837	0.09631	1.00143	0.85995
312.801	0.09458	0.99121	0.85232
313.765	0.09225	0.96987	0.84091
314.73	0.08991	0.954	0.83083
315.694	0.08755	0.94378	0.82213
316.658	0.08518	0.94211	0.82111
317.622	0.07917	0.95287	0.82914
318.586	0.07677	0.94846	0.81932
319.55	0.07436	0.94728	0.80807
320.514	0.07194	0.9516	0.79577
321.478	0.07125	0.95095	0.78568
322.442	0.07072	0.94043	0.77964
323.407	0.06976	0.9289	0.7731
324.371	0.07081	0.9198	0.76376
325.335	0.07186	0.90732	0.75519
326.299	0.07182	0.88544	0.75035
327.263	0.07033	0.86361	0.74384
328.227	0.07138	0.85215	0.72893
329.191	0.07174	0.84221	0.71079
330.155	0.06987	0.82025	0.69653
331.119	0.07049	0.7935	0.6841
332.084	0.06805	0.77807	0.66881
333.048	0.06576	0.77024	0.65209
334.012	0.0668	0.75423	0.63897
334.976	0.06784	0.7326	0.63045
335.94	0.07229	0.72532	0.62637
336.904	0.07356	0.73412	0.62582
337.868	0.07777	0.72976	0.61407
338.832	0.08233	0.70345	0.58416
339.796	0.08112	0.67936	0.56012
340.761	0.08146	0.65961	0.54799
341.725	0.08254	0.64297	0.53706
342.689	0.08362	0.6336	0.52816
343.653	0.08706	0.5714	0.48012
344.617	0.09525	0.54113	0.45385
345.581	0.10193	0.56235	0.44735
346.545	0.11001	0.57625	0.43911
347.509	0.11995	0.55087	0.42049
348.473	0.12985	0.52379	0.39998
349.438	0.13641	0.50187	0.3727
350.402	0.14108	0.48115	0.34624
351.366	0.14178	0.46314	0.33148
352.33	0.13359	0.44431	0.3212
353.294	0.1208	0.41537	0.32126
354.258	0.10801	0.38264	0.32144
355.222	0.09523	0.34926	0.29457
356.186	0.08379	0.3174	0.25612
357.151	0.07795	0.30104	0.23271
358.115	0.07204	0.29515	0.21971
359.079	0.06665	0.29217	0.21184
360.043	0.06749	0.29032	0.2079
361.007	0.06499	0.2752	0.19942
361.971	0.06594	0.24609	0.18575
362.935	0.06349	0.22282	0.17025
363.899	0.06419	0.20809	0.15277
364.863	0.06198	0.19666	0.14271
365.828	0.0624	0.19117	0.14589
366.792	0.06331	0.18304	0.14334
367.756	0.06421	0.1688	0.12689
368.72	0.06511	0.15985	0.11366
369.684	0.06601	0.16835	0.11087
370.648	0.06691	0.14335	0.07676
371.612	0.06195	0.12194	0.05662
372.576	0.06142	0.1243	0.07011
373.54	0.06425	0.12537	0.08265
374.505	0.06678	0.10959	0.08257
375.469	0.06594	0.09474	0.08233
376.433	0.06487	0.08871	0.07918
377.397	0.06429	0.08519	0.07762
378.361	0.06294	0.10056	0.09503
379.325	0.06377	0.11765	0.11204
380.289	0.06355	0.12008	0.09156
381.253	0.06178	0.11898	0.06434
382.217	0.06259	0.11873	0.06541
383.182	0.06406	0.11861	0.07622
384.146	0.06783	0.11521	0.07951
385.11	0.06824	0.11132	0.08013
386.074	0.06583	0.11761	0.09043
387.038	0.06649	0.1301	0.1057
388.002	0.06379	0.13734	0.10786
388.966	0.06106	0.14005	0.09969
389.93	0.05832	0.14229	0.09829
390.894	0.05881	0.14471	0.10464
391.859	0.05954	0.15331	0.11499
392.823	0.06026	0.16945	0.12936
393.787	0.06098	0.17941	0.13289
394.751	0.05897	0.17851	0.11896
395.715	0.05877	0.17669	0.1148
396.679	0.05948	0.1714	0.13834
397.643	0.06381	0.17859	0.1299
398.607	0.06231	0.18518	0.12794
399.572	0.06159	0.18946	0.1444
400.536	0.0623	0.19204	0.15666
401.5	0.063	0.18791	0.15319
402.464	0.06369	0.1835	0.15016
403.428	0.06439	0.17724	0.14865
404.392	0.06508	0.1742	0.1506
405.356	0.06448	0.18352	0.16589
406.32	0.06283	0.19236	0.17845
407.284	0.06247	0.19572	0.17722
408.249	0.06054	0.19743	0.17444
409.213	0.06042	0.19633	0.17356
410.177	0.0582	0.19782	0.17163
411.141	0.05873	0.20998	0.16452
412.105	0.05869	0.21983	0.15454
413.069	0.05895	0.211	0.14106
414.033	0.0592	0.19298	0.12934
414.997	0.05911	0.17268	0.12771
415.961	0.05866	0.15581	0.12973
416.926	0.05787	0.15308	0.1256
417.89	0.05674	0.15592	0.11532
418.854	0.05619	0.14636	0.09913
419.818	0.0575	0.12916	0.08218
420.782	0.0594	0.11924	0.07789
421.746	0.06111	0.11446	0.0838
422.71	0.06144	0.10452	0.08506
423.674	0.06108	0.07945	0.07399
424.638	0.06176	0.07292	0.06717
425.603	0.06304	0.06199	0.06809
426.567	0.0639	0.04726	0.07442
427.531	0.0639	0.03786	0.06344
428.495	0.06325	0.03538	0.03503
429.459	0.06159	0.04126	0.02427
430.423	0.059	0.05587	0.03303
431.387	0.05682	0.05134	0.03383
432.351	0.05575	0.02583	0.02592
433.315	0.05591	0.02711	0.01687
434.28	0.05687	0.05391	0.00668
435.244	0.05826	0.06633	0.00466
436.208	0.06002	0.06363	0.01034
437.172	0.06098	0.05709	0.01772
438.136	0.06069	0.04893	0.02566
439.1	0.0598	0.04408	0.02591
440.064	0.05891	0.04269	0.01867
441.028	0.05801	0.03398	0.00634
441.993	0.05675	0.01698	-0.00926
442.957	0.05548	0.00852	-0.01203
443.921	0.05319	0.01202	0.000237414
444.885	0.05116	0.0121	0.01451
445.849	0.04915	0.00342	0.02551
446.813	0.04711	-0.00452	0.0282
447.777	0.04591	-0.00753	0.0205
448.741	0.04571	-0.00309	0.02381
449.705	0.04574	0.01146	0.05124
450.67	0.04552	0.03845	0.07682
451.634	0.04341	0.04559	0.07329
452.598	0.04136	0.04568	0.0703
453.562	0.0385	0.04942	0.07141
454.526	0.03551	0.06986	0.08569
455.49	0.03319	0.09114	0.09996
456.454	0.03154	0.10441	0.10501
457.418	0.0302	0.11567	0.10977
458.382	0.02933	0.1174	0.12034
459.347	0.02888	0.11857	0.131
460.311	0.02887	0.12039	0.1348
461.275	0.03	0.12219	0.13856
462.239	0.03103	0.1241	0.14583
463.203	0.02955	0.12699	0.15333
464.167	0.02564	0.14389	0.16287
465.131	0.02234	0.15964	0.17138
466.095	0.02141	0.1534	0.17009
467.059	0.0229	0.14214	0.16679
468.024	0.02303	0.12795	0.16346
468.988	0.02146	0.1169	0.16289
469.952	0.01953	0.12295	0.17429
470.916	0.01825	0.13376	0.18674
471.88	0.01764	0.13679	0.18583
472.844	0.01739	0.13599	0.18031
473.808	0.01717	0.13579	0.18198
474.772	0.01611	0.13569	0.18616
475.736	0.0151	0.13479	0.18473
476.701	0.01468	0.13292	0.17927
477.665	0.01469	0.12599	0.17074
478.629	0.01608	0.12238	0.17553
479.593	0.01694	0.12056	0.18525
480.557	0.0168	0.12346	0.19252
481.521	0.01546	0.13081	0.1977
482.485	0.01277	0.1411	0.20204
483.449	0.00887	0.15277	0.20446
484.413	0.00409	0.16095	0.20101
485.378	-1.75316e-05	0.16991	0.19807
486.342	-0.000957851	0.19925	0.22463
487.306	0.000798301	0.23992	0.26923
488.27	0.00226	0.27732	0.33394
489.234	0.0028	0.31317	0.40782
490.198	0.00273	0.42602	0.49493
491.162	0.00239	0.56527	0.58668
492.126	0.00209	0.8178	0.79039
493.091	0.00217	1.10723	1.03083
494.055	0.00297	1.56932	1.45016
495.019	0.0054	2.08752	1.92772
495.983	0.00681	2.62862	2.63195
496.947	0.00478	3.17578	3.41643
497.911	0.00104	3.34799	4.16804
498.875	-0.00152	3.36206	4.89342
499.839	-0.00153	3.36363	5.13758
500.803	-2.11946e-05	3.36182	5.13074
501.768	0.00198	3.35548	5.11993
502.732	0.0043	3.34582	5.10589
503.696	0.00865	3.33428	5.08794
504.66	0.01609	3.30588	4.7247
505.624	0.04464	3.29068	4.24021
506.588	0.06354	3.27723	3.76901
507.552	0.09095	3.237	3.32887
508.516	0.1327	3.09528	2.9537
509.48	0.1879	2.8477	2.6508
510.445	0.27106	2.59431	2.36693
511.409	0.39942	2.34094	2.1117
512.373	0.57486	2.11247	1.89456
513.337	0.81204	1.91612	1.72121
514.301	1.14324	1.76657	1.58869
515.265	1.55708	1.65649	1.49089
516.229	1.97284	1.54198	1.39182
517.193	2.34179	1.42521	1.29277
518.157	2.66775	1.33931	1.22401
519.122	2.82975	1.27098	1.17247
520.086	2.77606	1.21098	1.11866
521.05	2.60366	1.15444	1.06383
522.014	2.35412	1.1024	1.01367
522.978	2.03918	1.05201	0.96533
523.942	1.71741	1.0114	0.93271
524.906	1.44473	0.97435	0.9059
525.87	1.2288	0.93842	0.87167
526.834	1.04889	0.90278	0.83421
527.799	0.90839	0.8718	0.80927
528.763	0.80273	0.84266	0.7898
529.727	0.71489	0.80911	0.76485
530.691	0.64051	0.7761	0.73811
531.655	0.5772	0.76114	0.7073
532.619	0.48586	0.732	0.67944
533.583	0.45459	0.68882	0.64701
534.547	0.42411	0.66528	0.63618
535.512	0.39396	0.65615	0.63739
536.476	0.3689	0.64044	0.61984
537.44	0.34897	0.6212	0.59172
538.404	0.33241	0.60881	0.58139
539.368	0.31789	0.60078	0.58361
540.332	0.30218	0.58795	0.57751
541.296	0.28633	0.57472	0.56417
542.26	0.27532	0.57569	0.5466
543.224	0.2643	0.58224	0.52905
544.189	0.25398	0.567	0.52911
545.153	0.24535	0.54338	0.53671
546.117	0.2317	0.54789	0.53175
547.081	0.22389	0.56192	0.52252
548.045	0.21304	0.52969	0.49087
549.009	0.20552	0.48851	0.45489
549.973	0.198	0.48852	0.46328
550.937	0.19049	0.49538	0.47901
551.901	0.18297	0.50062	0.48205
552.866	0.17859	0.5036	0.48127
553.83	0.17458	0.48493	0.46165
554.794	0.17057	0.46037	0.43807
555.758	0.16933	0.43397	0.41904
556.722	0.16884	0.41011	0.40187
557.686	0.16588	0.39678	0.38553
558.65	0.16192	0.37176	0.36429
559.614	0.15435	0.36357	0.35821
560.578	0.1504	0.37179	0.34886
561.543	0.14646	0.3685	0.33789
562.507	0.14068	0.32839	0.32711
563.471	0.13494	0.28714	0.31333
564.435	0.131	0.27955	0.2938
565.399	0.12706	0.28528	0.27942
566.363	0.12312	0.28564	0.28114
567.327	0.11919	0.28119	0.27627
568.291	0.11527	0.26991	0.23989
569.255	0.11227	0.25665	0.20569
570.22	0.11105	0.24291	0.20619
571.184	0.10779	0.23157	0.21196
572.148	0.10736	0.23209	0.21768
573.112	0.10693	0.23043	0.21922
574.076	0.10623	0.21328	0.19654
575.04	0.10231	0.19634	0.17606
576.004	0.09841	0.18053	0.16596
576.968	0.09798	0.16589	0.15161
577.933	0.09417	0.1548	0.12444
578.897	0.09025	0.13627	0.10125
579.861	0.08945	0.10298	0.08662
580.825	0.08902	0.07827	0.08512
581.789	0.08574	0.06783	0.10059
582.753	0.08455	0.06167	0.10564
583.717	0.08153	0.05734	0.09581
584.681	0.07763	0.05658	0.08038
585.645	0.07607	0.06241	0.05768
586.61	0.07709	0.06754	0.06429
587.574	0.07528	0.07084	0.05598
588.538	0.07294	0.07251	0.0337
589.502	0.06906	0.06215	0.02481
590.466	0.06519	0.04235	0.02971
591.43	0.06289	0.04757	0.03303
592.394	0.06252	0.07726	0.03457
593.358	0.06216	0.09113	0.0425
594.322	0.06179	0.08565	0.05552
595.287	0.06144	0.0765	0.0579
596.251	0.06109	0.06409	0.04991
597.215	0.05996	0.05632	0.05196
598.179	0.05611	0.05338	0.06174
599.143	0.05227	0.04869	0.0562
600.107	0.04881	0.04248	0.03655
601.071	0.04872	0.03702	0.02022
602.035	0.05173	0.03167	0.00885
602.999	0.05138	0.02219	0.02021
603.964	0.05103	0.01086	0.04182
604.928	0.05068	0.00756	0.02705
605.892	0.05356	0.00669	0.00108
606.856	0.0536	-0.00263	-0.00295
607.82	0.05325	-0.01341	-0.00335
608.784	0.05006	0.00163	-2.83105e-05
609.748	0.04892	0.01836	0.00493
610.712	0.04857	0.02202	0.02105
611.676	0.04822	0.02469	0.0358
612.641	0.04787	0.046	0.03833
613.605	0.05552	0.05757	0.05018
614.569	0.0601	0.05988	0.05992
615.533	0.06324	0.04656	0.06037
616.497	0.06458	0.04563	0.06315
617.461	0.06423	0.07011	0.07416
618.425	0.06388	0.08568	0.08332
619.389	0.06352	0.07703	0.08598
620.354	0.06189	0.06562	0.08824
621.318	0.0592	0.06156	0.09282
622.282	0.05783	0.0618	0.09883
623.246	0.0531	0.06592	0.10621
624.21	0.04653	0.07432	0.11475
625.174	0.04332	0.08943	0.12487
626.138	0.04298	0.10124	0.132
627.102	0.04226	0.10679	0.13432
628.066	0.03867	0.11199	0.14083
629.031	0.03821	0.11629	0.1535
629.995	0.03437	0.11856	0.15996
630.959	0.03401	0.11799	0.15813
631.923	0.03702	0.11696	0.15941
632.887	0.03696	0.11613	0.16377
633.851	0.03663	0.13416	0.16926
634.815	0.0363	0.16437	0.17546
635.779	0.03597	0.1601	0.18377
636.743	0.03296	0.14301	0.19303
637.708	0.03172	0.15843	0.1943
638.672	0.03144	0.18281	0.19353
639.636	0.03353	0.17476	0.21114
640.6	0.03255	0.172	0.20976
641.564	0.02905	0.17142	0.20839
642.528	0.02766	0.17426	0.21532
643.492	0.02979	0.17915	0.22148
644.456	0.03199	0.18593	0.22004
645.42	0.03388	0.18704	0.22071
646.385	0.03496	0.17798	0.22966
647.349	0.03309	0.1649	0.23226
648.313	0.03119	0.15231	0.22118
649.277	0.02586	0.15599	0.21743
650.241	0.02454	0.18179	0.23092
651.205	0.02571	0.19756	0.22366
652.169	0.02724	0.18887	0.178
653.133	0.02771	0.18672	0.16213
654.097	0.02694	0.20156	0.20753
655.062	0.02574	0.20996	0.23251
656.026	0.02287	0.20609	0.22039
656.99	0.01931	0.20058	0.20946
657.954	0.01851	0.19174	0.20231
658.918	0.02072	0.1786	0.20697
659.882	0.02404	0.16264	0.22506
660.846	0.02653	0.16752	0.23913
661.81	0.02713	0.1881	0.24953
662.775	0.02739	0.18425	0.24661
663.739	0.02792	0.16891	0.23742
664.703	0.02803	0.17866	0.23434
665.667	0.0277	0.19446	0.23273
666.631	0.02704	0.15979	0.19263
667.595	0.0256	0.15545	0.17615
668.559	0.02572	0.15394	0.16534
669.523	0.02656	0.15418	0.1708
670.487	0.02822	0.15282	0.17959
671.452	0.02974	0.14765	0.18718
672.416	0.0295	0.14629	0.19216
673.38	0.02643	0.15155	0.19419
674.344	0.02221	0.15755	0.18877
675.308	0.02032	0.16184	0.17634
676.272	0.02096	0.15672	0.16663
677.236	0.0225	0.14238	0.16198
678.2	0.02357	0.14581	0.16594
679.164	0.02381	0.16892	0.17701
680.129	0.02404	0.17016	0.17452
681.093	0.02424	0.1458	0.15832
682.057	0.02419	0.13493	0.15864
683.021	0.02513	0.13874	0.17427
683.985	0.02642	0.13661	0.17285
684.949	0.02736	0.12877	0.15794
685.913	0.02664	0.12226	0.15793
686.877	0.02487	0.11993	0.16638
687.841	0.02362	0.13411	0.16195
688.806	0.02334	0.15331	0.15234
689.77	0.02293	0.15149	0.14794
690.734	0.02192	0.14561	0.14471
691.698	0.01946	0.14755	0.14429
692.662	0.01723	0.1449	0.14329
693.626	0.016	0.09666	0.13266
694.59	0.01519	0.12688	0.12672
695.554	0.015	0.14885	0.13812
696.518	0.01481	0.15518	0.17298
697.483	0.01532	0.15648	0.18529
698.447	0.01653	0.1554	0.1749
699.411	0.01699	0.15159	0.16671
700.375	0.01604	0.14631	0.16285
701.339	0.01433	0.14506	0.17789
702.303	0.01293	0.14608	0.20096
703.267	0.01301	0.14514	0.19252
704.231	0.01376	0.14548	0.16972
705.196	0.01404	0.1566	0.16722
706.16	0.01347	0.17112	0.17621
707.124	0.013	0.17589	0.1796
708.088	0.0132	0.17756	0.17834
709.052	0.01401	0.18634	0.17527
710.016	0.01448	0.19164	0.179
710.98	0.01427	0.1816	0.19872
711.944	0.01406	0.17282	0.21562
712.908	0.01517	0.18082	0.21133
713.873	0.0173	0.18847	0.20175
714.837	0.01863	0.18718	0.18803
715.801	0.01865	0.19348	0.1808
716.765	0.01761	0.21776	0.18877
717.729	0.01582	0.23804	0.19202
718.693	0.01336	0.24999	0.18739
719.657	0.01141	0.20359	0.17385
720.621	0.01068	0.19951	0.17922
721.585	0.01232	0.21099	0.19107
722.55	0.01178	0.21989	0.19954
723.514	0.01068	0.22824	0.20722
724.478	0.00956	0.24194	0.19784
725.442	0.00826	0.24918	0.18856
726.406	0.00725	0.22096	0.18971
727.37	0.0072	0.20267	0.19829
728.334	0.00787	0.22149	0.21841
729.298	0.00789	0.22975	0.23001
730.262	0.00665	0.2103	0.22605
731.227	0.00497	0.20205	0.22023
732.191	0.00456	0.21361	0.21748
733.155	0.00528	0.22786	0.22355
734.119	0.00784	0.23927	0.23611
735.083	0.01341	0.23719	0.22066
736.047	0.02132	0.22569	0.18369
737.011	0.02517	0.22737	0.17356
737.975	0.02211	0.23737	0.18628
738.939	0.01564	0.2338	0.18935
739.904	0.01073	0.22266	0.18282
740.868	0.00781	0.22296	0.17308
741.832	0.00721	0.22779	0.16835
742.796	0.01127	0.22416	0.18469
743.76	0.01708	0.21559	0.20598
744.724	0.01995	0.20026	0.21514
745.688	0.0178	0.1882	0.216
746.652	0.01405	0.19386	0.16546
747.616	0.01141	0.18145	0.16528
748.581	0.00995	0.17914	0.17809
749.545	0.01044	0.19041	0.20839
750.509	0.01143	0.18564	0.20346
751.473	0.01258	0.17059	0.17603
752.437	0.01406	0.16089	0.17932
753.401	0.01504	0.15315	0.1935
754.365	0.01388	0.15729	0.20082
755.329	0.01095	0.16113	0.20424
756.294	0.0081	0.14994	0.1933
757.258	0.00693	0.14168	0.17896
758.222	0.00704	0.14859	0.16507
759.186	0.00728	0.14841	0.15289
760.15	0.00803	0.13195	0.14281
761.114	0.00848	0.12336	0.14786
762.078	0.00891	0.12861	0.16759
763.042	0.00901	0.12791	0.17825
764.006	0.00877	0.11757	0.17574
764.971	0.00818	0.10075	0.16084
765.935	0.0076	0.08208	0.13733
766.899	0.00734	0.077	0.12267
767.863	0.00741	0.08329	0.11863
768.827	0.00723	0.08445	0.12021
769.791	0.007	0.08177	0.11929
770.755	0.00652	0.07931	0.09957
771.719	0.00622	0.07525	0.0775
772.683	0.00601	0.06574	0.07826
773.648	0.00627	0.07122	0.09118
774.612	0.00742	0.07295	0.09012
775.576	0.01014	0.05035	0.06947
776.54	0.00848	0.02992	0.05479
777.504	0.00567	0.01313	0.0487
778.468	0.00387	0.01248	0.05011
779.432	0.00322	0.02327	0.05681
780.396	0.00333	0.04856	0.0583
781.36	0.00344	0.07808	0.05827
782.325	0.00355	0.03258	0.04889
783.289	0.00366	-0.01111	0.04024
784.253	0.00386	-0.00342	0.04033
785.217	0.00447	0.00959	0.03495
786.181	0.00589	0.01362	0.01641
787.145	0.00839	0.00803	0.0015
788.109	0.01036	-0.00532	-0.00567
789.073	0.01039	-0.00241	-0.00518
790.037	0.00946	0.01532	-0.000389171
791.002	0.00888	0.02197	0.00953
791.966	0.00933	0.0188	0.02053
792.93	0.00979	0.01808	0.02122
793.894	0.01025	0.0195	0.01608
794.858	0.01071	0.02092	0.01697
795.822	0.01057	0.02543	0.02526
796.786	0.00862	0.03636	0.03988
797.75	0.00683	0.04441	0.05058
798.715	0.00597	0.03905	0.04566
799.679	0.00661	0.03395	0.04696
800.643	0.00776	0.0389	0.09187
801.607	0.00914	0.03221	0.08936
802.571	0.01132	0.02052	0.08776
803.535	0.01135	0.00627	0.08799
804.499	0.01076	0.01456	0.09293
805.463	0.00983	0.0359	0.10029
806.427	0.00839	0.04178	0.10045
807.392	0.00746	0.04381	0.099
808.356	0.00796	0.03617	0.10283
809.32	0.00911	0.0312	0.11052
810.284	0.01007	0.03492	0.13095
811.248	0.01034	0.03753	0.1489
812.212	0.01026	0.03783	0.16229
813.176	0.01078	0.03942	0.17786
814.14	0.01148	0.04218	0.19547
815.104	0.01148	0.04095	0.20686
816.069	0.01044	0.03832	0.21613
817.033	0.00815	0.04209	0.23641
817.997	0.00721	0.05041	0.25881
818.961	0.00836	0.06345	0.27317
819.925	0.00918	0.06993	0.28564
820.889	0.00838	0.06193	0.30153
821.853	0.00713	0.05324	0.30521
822.817	0.00643	0.05226	0.29106
823.781	0.00782	0.0476	0.28827
824.746	0.00968	0.03744	0.30683
825.71	0.0105	0.04114	0.3254
826.674	0.01047	0.05918	0.33896
827.638	0.01046	0.05338	0.33742
828.602	0.01035	0.04257	0.34276
829.566	0.01052	0.0325	0.3459
830.53	0.01117	0.02696	0.32332
831.494	0.01179	0.02353	0.30246
832.458	0.01158	0.02477	0.3136
833.423	0.01064	0.02805	0.32648
834.387	0.00998	0.03585	0.34228
835.351	0.00999	0.04366	0.3443
836.315	0.01045	0.0515	0.33124
837.279	0.01111	0.05524	0.33383
838.243	0.01218	0.0573	0.34291
839.207	0.01291	0.03858	0.31103
840.171	0.0133	0.01934	0.2807
841.136	0.01336	0.01451	0.29384
842.1	0.01294	0.01867	0.30286
843.064	0.01097	0.03499	0.29203
844.028	0.00937	0.04418	0.27849
844.992	0.00913	0.04396	0.26672
845.956	0.00958	0.04205	0.24692
846.92	0.01003	0.04096	0.22286
847.884	0.01112	0.04555	0.21703
848.848	0.01166	0.04906	0.21698
849.813	0.01152	0.03923	0.20017
850.777	0.01099	0.0223	0.17352
851.741	0.01067	0.00758	0.14798
852.705	0.01093	0.00123	0.13291
853.669	0.01187	0.00598	0.13306
854.633	0.01279	-0.00943	0.12437
855.597	0.01337	-0.00557	0.11347
856.561	0.01439	0.01699	0.09899
857.525	0.015	0.02743	0.08148
858.49	0.01474	0.02501	0.06307
859.454	0.01298	0.01417	0.05074
860.418	0.01044	0.00547	0.04315
861.382	0.00851	0.02477	0.04563
862.346	0.00745	0.04536	0.04711
863.31	0.00728	0.06122	0.04163
864.274	0.00855	0.06904	0.03151
865.238	0.01091	0.06459	0.01432
866.202	0.01222	0.05428	0.02571
867.167	0.01154	0.04063	0.05326
868.131	0.01058	0.04526	0.05494
869.095	0.00957	0.05159	0.05238
870.059	0.00832	0.03971	0.06202
871.023	0.00811	0.03328	0.06555
871.987	0.01029	0.04349	0.05295
872.951	0.01212	0.04649	0.05389
873.915	0.01196	0.0386	0.0717
874.879	0.01044	0.04507	0.0874
875.844	0.00911	0.06151	0.09769
876.808	0.00901	0.06804	0.0919
877.772	0.00942	0.06526	0.08224
878.736	0.00963	0.05565	0.08638
879.7	0.00951	0.05266	0.09297
880.664	0.00953	0.06736	0.08997
881.628	0.0099	0.093	0.12296
882.592	0.01038	0.09579	0.1367
883.557	0.0097	0.09613	0.13298
884.521	0.0088	0.10397	0.1393
885.485	0.00791	0.11989	0.1512
886.449	0.00701	0.13643	0.14838
887.413	0.00672	0.14405	0.14433
888.377	0.00764	0.1209	0.16716
889.341	0.00907	0.1057	0.19243
890.305	0.01039	0.14681	0.20207
891.269	0.01165	0.17659	0.20622
892.234	0.01183	0.18572	0.20094
893.198	0.01059	0.20292	0.20589
894.162	0.00815	0.22655	0.21892
895.126	0.00699	0.26446	0.22131
896.09	0.00855	0.30606	0.22236
897.054	0.0097	0.35378	0.23751
898.018	0.00918	0.38543	0.24249
898.982	0.00798	0.38163	0.22342
899.946	0.00747	0.39795	0.23175
900.911	0.00862	0.43753	0.26841
901.875	0.00955	0.45764	0.28127
902.839	0.00954	0.46465	0.27833
903.803	0.00851	0.46179	0.26577
904.767	0.00703	0.46489	0.25824
905.731	0.00413	0.48973	0.2697
906.695	0.00156	0.5093	0.28028
907.659	0.00166	0.5085	0.27798
908.623	0.00422	0.47684	0.23788
909.588	0.0071	0.46163	0.23362
910.552	0.00959	0.45162	0.24506
911.516	0.00972	0.44757	0.24727
912.48	0.00936	0.44703	0.24572
913.444	0.00946	0.44432	0.25111
914.408	0.01091	0.44254	0.25328
915.372	0.0133	0.44484	0.24211
916.336	0.01567	0.44594	0.23645
917.3	0.01738	0.44346	0.24334
918.265	0.01852	0.43847	0.2481
919.229	0.01923	0.43314	0.25173
920.193	0.01948	0.44228	0.26227
921.157	0.02024	0.45547	0.27346
922.121	0.0223	0.44466	0.25571
923.085	0.02534	0.43583	0.24443
924.049	0.02902	0.435	0.25558
925.013	0.03272	0.43397	0.26643
925.978	0.0378	0.43276	0.27702
926.942	0.0446	0.44349	0.28188
927.906	0.05274	0.45668	0.28527
928.87	0.06098	0.43623	0.29797
929.834	0.07073	0.42402	0.31479
930.798	0.0784	0.44602	0.33603
931.762	0.08559	0.45143	0.34851
932.726	0.09278	0.43011	0.35086
933.69	0.09747	0.41685	0.34966
934.655	0.10117	0.41237	0.34881
935.619	0.10487	0.38746	0.35137
936.583	0.10646	0.39412	0.33505
937.547	0.10667	0.39997	0.31822
938.511	0.10502	0.39237	0.31159
939.475	0.10173	0.3822	0.30663
940.439	0.10004	0.37562	0.2991
941.403	0.10025	0.37453	0.28959
942.367	0.10045	0.3784	0.27705
943.332	0.10186	0.37988	0.26194
944.296	0.10449	0.38131	0.24832
945.26	0.10469	0.3867	0.24399
946.224	0.10409	0.38857	0.24493
947.188	0.10148	0.37727	0.25319
948.152	0.10114	0.36404	0.25119
949.116	0.09785	0.3483	0.23581
950.08	0.09457	0.33446	0.22843
951.044	0.09144	0.32129	0.22452
952.009	0.09165	0.29843	0.19692
952.973	0.09185	0.27578	0.1723
953.937	0.09206	0.25651	0.16452
954.901	0.09227	0.24711	0.1575
955.865	0.09247	0.24772	0.15064
956.829	0.09268	0.24593	0.13431
957.793	0.09001	0.24269	0.11588
958.757	0.08947	0.24009	0.12166
959.721	0.08706	0.23434	0.12785
960.686	0.08626	0.22184	0.12202
961.65	0.08411	0.22312	0.12214
962.614	0.08305	0.23736	0.13263
963.578	0.08325	0.22207	0.12489
964.542	0.0815	0.21378	0.10963
965.506	0.08004	0.21075	0.10467
966.47	0.08025	0.20858	0.12432
967.434	0.08046	0.20947	0.125
968.399	0.08066	0.21268	0.08844
969.363	0.08087	0.2059	0.07063
970.327	0.08108	0.1904	0.0812
971.291	0.08012	0.18874	0.07537
972.255	0.07658	0.19158	0.06485
973.219	0.07369	0.17416	0.08006
974.183	0.07255	0.15054	0.0946
975.147	0.0731	0.13549	0.07412
976.111	0.07382	0.13205	0.05487
977.076	0.07572	0.14794	0.04242
978.04	0.07686	0.15863	0.05223
979.004	0.07531	0.16618	0.07624
979.968	0.07202	0.1818	0.07641
980.932	0.06941	0.19623	0.07364
981.896	0.06942	0.19808	0.0748
982.86	0.06963	0.19492	0.07274
983.824	0.06774	0.18608	0.06702
984.788	0.06436	0.18459	0.05866
985.753	0.061	0.18646	0.04826
986.717	0.05823	0.19077	0.02324
987.681	0.05564	0.19443	0.01405
988.645	0.05329	0.19601	0.04058
989.609	0.05083	0.19896	0.0425
990.573	0.04783	0.17714	0.04837
991.537	0.04094	0.15237	0.06335
992.501	0.03945	0.15188	0.07751
993.465	0.03929	0.16058	0.08754
994.43	0.03887	0.16497	0.09263
995.394	0.03711	0.16417	0.09953
996.358	0.03491	0.16311	0.11019
997.322	0.03419	0.178	0.12039
998.286	0.0353	0.20032	0.13213
999.25	0.03636	0.20057	0.13287
1000.21	0.02511	0.20082	0.1336
1001.18	0.02511	0.20107	0.13434
1002.14	0.0251	0.20132	0.13507
1003.11	0.0251	0.20158	0.1358
1004.07	0.0251	0.20188	0.13654
1005.03	0.02509	0.20223	0.13727
1006	0.02509	0.2026	0.13801
1006.96	0.02509	0.20301	0.13874
1007.93	0.02508	0.09612	0.12122
1008.89	0.02508	0.09519	0.12308
1009.86	0.02507	0.09431	0.12494
1010.82	0.01786	0.09341	0.1268
1011.78	0.0179	0.09251	0.12865
1012.75	0.01792	0.09159	0.13051
1013.71	0.01793	0.09066	0.13237
1014.68	0.01795	0.08971	0.13423
1015.64	0.01796	0.08876	0.13609
1016.6	0.01797	0.08779	0.13795
1017.57	0.01798	0.0867	0.1398
1018.53	0.01798	0.01081	0.18736
1019.5	0.01798	0.00948	0.1853
1020.46	0.01221	0.00802	0.18325
1021.42	0.01226	0.00644	0.18119
1022.39	0.0123	0.00485	0.17914
1023.35	0.01234	0.00325	0.17709
1024.32	0.01237	0.00163	0.17503
1025.28	0.0124	-2.36139e-16	0.17298
1026.24	0.01243	-0.00179	0.17093
1027.21	0.01246	-0.00375	0.16887
1028.17	0.0125	0.10584	0.18471
1029.14	0.01252	0.1087	0.18506
1030.1	0.00744	0.11137	0.18541
1031.07	0.00727	0.11405	0.18576
1032.03	0.0071	0.11672	0.18611
1032.99	0.00691	0.11939	0.18645
1033.96	0.00673	0.12207	0.1868
1034.92	0.00654	0.12474	0.18715
1035.89	0.00635	0.12742	0.1875
1036.85	0.00616	0.13009	0.18785
1037.82	0.00596	0.18161	0.09515
1038.78	0.00577	0.18302	0.09402
1039.74	0.00557	0.18443	0.09288
1040.71	0.00848	0.18585	0.09175
1041.67	0.00856	0.18726	0.09061
1042.63	0.00865	0.18867	0.08947
1043.6	0.00873	0.19008	0.08834
1044.56	0.00882	0.19149	0.0872
1045.53	0.0089	0.19291	0.08607
1046.49	0.00899	0.19432	0.08493
1047.46	0.00907	0.19573	0.08379
1048.42	0.00915	0.15344	0.13195
1049.38	0.00924	0.15366	0.13203
1050.35	0.00349	0.15388	0.13212
1051.31	0.00346	0.1541	0.1322
1052.28	0.00343	0.15432	0.13229
1053.24	0.00338	0.15454	0.13237
1054.2	0.00334	0.15475	0.13245
1055.17	0.00329	0.15497	0.13254
1056.13	0.00325	0.15519	0.13262
1057.1	0.0032	0.15541	0.13271
1058.06	0.00316	0.12177	0.01476
1059.03	0.00311	0.11958	0.01353
1059.99	0.00306	0.1174	0.01212
1060.95	0.00142	0.11522	0.01052
1061.92	0.00122	0.11303	0.00891
1062.88	0.00103	0.11085	0.00729
1063.85	0.000823495	0.10866	0.00565
1064.81	0.000619851	0.10648	0.004
1065.77	0.00041472	0.10429	0.00234
1066.74	0.000208103	0.10211	0.000597106
1067.7	-5.55112e-17	0.07534	-0.01289
1068.67	-0.000221649	0.07758	0.03934
1069.63	-0.000455654	0.07704	0.03967
1070.6	0.00885	0.07648	0.03991
1071.56	0.00882	0.07593	0.04015
1072.52	0.00879	0.07537	0.04039
1073.49	0.00876	0.07482	0.04062
1074.45	0.00873	0.07426	0.04085
1075.41	0.0087	0.07369	0.04107
1076.38	0.00867	0.07308	0.04109
1077.34	0.00864	0.07245	0.04091
1078.31	0.00861	0.10598	0.17578
1079.27	0.00858	0.10506	0.17516
1080.24	0.00526	0.10414	0.17433
1081.2	0.00509	0.10323	0.17351
1082.16	0.00492	0.10231	0.17268
1083.13	0.00475	0.10139	0.17186
1084.09	0.00457	0.10047	0.17103
1085.06	0.0044	0.09955	0.17021
1086.02	0.00423	0.09863	0.16938
1086.98	0.00406	0.09771	0.16856
1087.95	0.00389	0.10804	0.2876
1088.91	0.00372	0.10931	0.28787
1089.88	0.00355	0.11058	0.28815
1090.84	0.00354	0.11185	0.28843
1091.81	0.00354	0.11312	0.28871
1092.77	0.00355	0.1144	0.28899
1093.73	0.00355	0.11567	0.28927
1094.7	0.00355	0.11694	0.28955
1095.66	0.00356	0.11821	0.28982
1096.63	0.00356	0.11948	0.2901
1097.59	0.00356	0.12075	0.29038
1098.55	0.00356	0.0698	0.2627
1099.52	0.00356	0.06749	0.26181
1100.48	0.00506	0.06518	0.26092
1101.45	0.00516	0.06288	0.26004
1102.41	0.00525	0.06057	0.25915
1103.37	0.00535	0.05826	0.25827
1104.34	0.00544	0.05596	0.25738
1105.3	0.00553	0.05365	0.2565
1106.27	0.00562	0.05128	0.25561
1107.23	0.00571	0.04888	0.25473
1108.19	0.00579	0.09403	0.30971
1109.16	0.00586	0.09335	0.30899
1110.12	0.01241	0.09268	0.30826
1111.09	0.01222	0.092	0.30754
1112.05	0.01202	0.09133	0.30682
1113.02	0.01182	0.09066	0.3061
1113.98	0.01163	0.08998	0.30538
1114.94	0.01143	0.08931	0.30466
1115.91	0.01123	0.08863	0.30394
1116.87	0.01103	0.08796	0.30322
1117.84	0.01084	0.08523	0.29649
1118.8	0.01064	0.08499	0.29474
1119.76	0.01044	0.08474	0.29299
1120.73	0.01035	0.0845	0.29124
1121.69	0.0103	0.08426	0.2895
1122.66	0.01024	0.08401	0.28775
1123.62	0.01018	0.08377	0.286
1124.59	0.01012	0.08353	0.28426
1125.55	0.01007	0.08328	0.28251
1126.51	0.01001	0.08304	0.28076
1127.48	0.00995	0.0828	0.27902
1128.44	0.00988	0.12698	0.31046
1129.4	0.00982	0.12604	0.30778
1130.37	0.01332	0.1251	0.3051
1131.33	0.01314	0.12416	0.30242
1132.3	0.01295	0.12322	0.29974
1133.26	0.01277	0.12228	0.29706
1134.23	0.01258	0.12135	0.29438
1135.19	0.0124	0.12041	0.29169
1136.15	0.01221	0.11947	0.28901
1137.12	0.01202	0.11853	0.28633
1138.08	0.01184	0.06206	0.18715
1139.05	0.01165	0.06008	0.18489
1140.01	0.01327	0.0581	0.18263
1140.97	0.01301	0.05612	0.18037
1141.94	0.01275	0.05414	0.17811
1142.9	0.01249	0.05216	0.17585
1143.87	0.01223	0.05018	0.17358
1144.83	0.01197	0.0482	0.17132
1145.8	0.01171	0.04622	0.16906
1146.76	0.01145	0.04425	0.1668
1147.72	0.01119	0.09441	0.16116
1148.69	0.01093	0.09198	0.15857
1149.65	0.01065	0.08955	0.15598
1150.62	0.01769	0.08712	0.15338
1151.58	0.01754	0.08469	0.15079
1152.54	0.01737	0.08226	0.1482
1153.51	0.0172	0.07983	0.14561
1154.47	0.01703	0.0774	0.14302
1155.44	0.01686	0.07497	0.14043
1156.4	0.01669	0.0727	0.13783
1157.37	0.01652	0.07058	0.13524
1158.33	0.01635	0.02214	0.07527
1159.29	0.01616	0.02029	0.0729
1160.26	0.02284	0.01861	0.07052
1161.22	0.02259	0.01694	0.06815
1162.18	0.02235	0.01526	0.06578
1163.15	0.02211	0.01359	0.06341
1164.11	0.02187	0.01192	0.06103
1165.08	0.02163	0.01024	0.05866
1166.04	0.02139	0.00852	0.05629
1167.01	0.02115	0.00675	0.05391
1167.97	0.02091	0.04283	0.08664
1168.93	0.02067	0.04287	0.08413
1169.9	0.02043	0.04285	0.08163
1170.86	0.01832	0.04283	0.07913
1171.83	0.01843	0.04281	0.07662
1172.79	0.01854	0.04278	0.07412
1173.76	0.01865	0.04275	0.07162
1174.72	0.01875	0.04272	0.06912
1175.68	0.01885	0.04265	0.06661
1176.65	0.01895	0.04253	0.06411
1177.61	0.01905	0.06803	0.04877
1178.58	0.01914	0.06647	0.04739
1179.54	0.01922	0.06491	0.04601
1180.5	0.02425	0.06335	0.04464
1181.47	0.02411	0.06179	0.04326
1182.43	0.02396	0.06023	0.04188
1183.4	0.02382	0.05867	0.0405
1184.36	0.02368	0.05711	0.03913
1185.32	0.02353	0.05555	0.03775
1186.29	0.02339	0.05386	0.03637
1187.25	0.02325	0.05205	0.035
1188.22	0.0231	0.13934	0.02332
1189.18	0.02296	0.14054	0.02218
1190.14	0.01959	0.1416	0.02103
1191.11	0.01969	0.14264	0.01989
1192.07	0.01979	0.14366	0.01875
1193.04	0.01989	0.14467	0.0176
1194	0.01999	0.14566	0.01645
1194.96	0.02008	0.14663	0.0153
1195.93	0.02017	0.14749	0.01405
1196.89	0.02026	0.14825	0.01274
1197.86	0.02034	0.21111	0.0819
1198.82	0.02041	0.20965	0.07862
1199.79	0.02045	0.20809	0.07559
1200.75	0.03345	0.20653	0.07267
1201.71	0.0329	0.20497	0.06977
1202.68	0.03234	0.20342	0.06689
1203.64	0.03178	0.20186	0.06403
1204.61	0.03123	0.2003	0.06119
1205.57	0.03069	0.19858	0.05838
1206.54	0.03016	0.19675	0.05586
1207.5	0.02963	0.31101	0.174
1208.46	0.02909	0.31059	0.17466
1209.43	0.02855	0.31028	0.17562
1210.39	0.03071	0.31008	0.17687
1211.36	0.03055	0.30988	0.17813
1212.32	0.03038	0.30968	0.17942
1213.28	0.03022	0.30948	0.18072
1214.25	0.03005	0.30929	0.18204
1215.21	0.02988	0.30909	0.18337
1216.18	0.02971	0.309	0.18471
1217.14	0.02954	0.30901	0.18605
1218.1	0.02936	0.39125	0.17762
1219.07	0.02918	0.39198	0.17859
1220.03	0.03404	0.39282	0.17957
1221	0.0335	0.39368	0.18055
1221.96	0.03295	0.39454	0.18153
1222.92	0.03241	0.39541	0.1825
1223.89	0.03187	0.3963	0.18348
1224.85	0.03132	0.39719	0.18446
1225.82	0.03078	0.39812	0.18543
1226.78	0.03023	0.39913	0.18641
1227.74	0.02969	0.5224	0.17364
1228.71	0.02914	0.52358	0.1759
1229.67	0.0286	0.52481	0.17816
1230.64	0.02781	0.52609	0.18043
1231.6	0.02744	0.52737	0.18269
1232.57	0.02707	0.52865	0.18495
1233.53	0.02671	0.52993	0.18721
1234.49	0.02634	0.5312	0.18948
1235.46	0.02598	0.53248	0.19174
1236.42	0.02562	0.53388	0.194
1237.39	0.02526	0.66439	0.20314
1238.35	0.0249	0.66738	0.20469
1239.31	0.02455	0.67044	0.20625
1240.28	0.02927	0.67359	0.20781
1241.24	0.02892	0.67674	0.20936
1242.21	0.02857	0.6799	0.21092
1243.17	0.02822	0.68307	0.21248
1244.13	0.02788	0.68625	0.21403
1245.1	0.02755	0.68945	0.21559
1246.06	0.02723	0.69264	0.21715
1247.03	0.02692	0.69583	0.2187
1247.99	0.02661	0.81677	0.25726
1248.96	0.0263	0.81774	0.25973
1249.92	0.02599	0.81871	0.2622
1250.88	0.02061	0.81968	0.26467
1251.85	0.02031	0.82064	0.26715
1252.81	0.02	0.82161	0.26962
1253.78	0.01969	0.82258	0.27209
1254.74	0.01938	0.82355	0.27456
1255.7	0.01907	0.82452	0.27703
1256.67	0.01877	0.82548	0.27951
1257.63	0.01846	0.9146	0.34801
1258.6	0.01814	0.91503	0.34822
1259.56	0.01782	0.9155	0.34844
1260.53	0.02256	0.91602	0.34865
1261.49	0.02223	0.91654	0.34886
1262.45	0.02189	0.91706	0.34908
1263.42	0.02154	0.91758	0.34929
1264.38	0.02121	0.91809	0.34951
1265.35	0.02088	0.91861	0.34972
1266.31	0.02055	0.91913	0.34993
1267.27	0.02023	0.87101	0.34424
1268.24	0.0199	0.86932	0.34566
1269.2	0.01957	0.86763	0.34708
1270.17	0.02288	0.86594	0.34851
1271.13	0.02264	0.86425	0.34993
1272.09	0.0224	0.86256	0.35135
1273.06	0.02215	0.86087	0.35277
1274.02	0.02191	0.85918	0.35419
1274.99	0.02167	0.85749	0.35562
1275.95	0.02143	0.8558	0.35704
1276.91	0.02119	0.85411	0.35846
1277.88	0.02094	0.83608	0.34505
1278.84	0.02068	0.83453	0.34484
1279.81	0.0204	0.83299	0.34463
1280.77	0.03265	0.83144	0.34442
1281.73	0.03216	0.82989	0.34421
1282.7	0.03165	0.82834	0.34401
1283.66	0.03114	0.8268	0.3438
1284.63	0.03065	0.82525	0.34359
1285.59	0.03016	0.8237	0.34338
1286.56	0.02968	0.82215	0.34325
1287.52	0.02922	0.6825	0.34474
1288.48	0.02874	0.68284	0.34569
1289.45	0.02824	0.68319	0.34674
1290.41	0.04347	0.68353	0.3479
1291.38	0.04335	0.68388	0.34905
1292.34	0.04319	0.68422	0.3502
1293.31	0.04304	0.68457	0.35135
1294.27	0.04289	0.68491	0.3525
1295.23	0.04275	0.68525	0.35366
1296.2	0.04262	0.68564	0.35481
1297.16	0.04249	0.55213	0.26304
1298.12	0.04233	0.55216	0.26462
1299.09	0.04215	0.55224	0.26621
1300.05	0.06003	0.55237	0.2678
1301.02	0.05945	0.55251	0.26939
1301.98	0.05883	0.55265	0.27097
1302.95	0.05822	0.5528	0.27256
1303.91	0.05761	0.55294	0.27415
1304.87	0.057	0.55309	0.27574
1305.84	0.05638	0.55329	0.27732
1306.8	0.05577	0.55352	0.27891
1307.77	0.05516	0.46007	0.27433
1308.73	0.05453	0.45774	0.27486
1309.69	0.05389	0.45541	0.2754
1310.66	0.0641	0.45309	0.27593
1311.62	0.06344	0.45076	0.27647
1312.59	0.06275	0.44844	0.277
1313.55	0.06208	0.44611	0.27753
1314.52	0.06141	0.44379	0.27807
1315.48	0.06075	0.44146	0.2786
1316.44	0.06009	0.43926	0.27913
1317.41	0.05945	0.30073	0.211
1318.37	0.05877	0.30093	0.2132
1319.34	0.0581	0.30128	0.21539
1320.3	0.07554	0.30176	0.21759
1321.26	0.07487	0.30227	0.2198
1322.23	0.0742	0.30279	0.222
1323.19	0.07352	0.30333	0.2242
1324.16	0.07285	0.30389	0.22641
1325.12	0.07218	0.30446	0.22861
1326.09	0.0715	0.30515	0.23093
1327.05	0.07083	0.236	0.1042
1328.01	0.07016	0.2361	0.10338
1328.98	0.06949	0.23629	0.10237
1329.94	0.06882	0.23658	0.10115
1330.9	0.07573	0.23688	0.09991
1331.87	0.07541	0.23717	0.09866
1332.83	0.0751	0.23747	0.09739
1333.8	0.07479	0.23777	0.0961
1334.76	0.07451	0.23807	0.0948
1335.73	0.07424	0.23855	0.09348
1336.69	0.07399	0.23918	0.09206
1337.65	0.07376	0.1676	0.04251
1338.62	0.07354	0.16923	0.04081
1339.58	0.07332	0.17074	0.03901
1340.55	0.06928	0.17215	0.03713
1341.51	0.06871	0.17356	0.03522
1342.47	0.06814	0.17497	0.0333
1343.44	0.06757	0.17638	0.03136
1344.4	0.067	0.17778	0.0294
1345.37	0.06644	0.17919	0.02743
1346.33	0.06588	0.18049	0.02545
1347.3	0.06532	0.11156	0.12361
1348.26	0.06477	0.1113	0.12487
1349.22	0.06422	0.11092	0.12612
1350.19	0.05642	0.11044	0.12738
1351.15	0.05588	0.10994	0.12864
1352.12	0.05533	0.10943	0.1299
1353.08	0.05478	0.10892	0.13115
1354.04	0.05425	0.10839	0.13241
1355.01	0.05372	0.10785	0.13367
1355.97	0.05319	0.10728	0.13493
1356.94	0.05267	0.09095	0.13869
1357.9	0.05215	0.06363	0.15435
1358.86	0.05163	0.0646	0.15465
1359.83	0.05111	0.06562	0.15494
1360.79	0.04725	0.06661	0.15523
1361.76	0.04708	0.06762	0.15553
1362.72	0.04691	0.06863	0.15582
1363.68	0.04673	0.06966	0.15611
1364.65	0.04656	0.0707	0.15641
1365.61	0.04639	0.07174	0.1567
1366.58	0.04622	0.07272	0.15699
1367.54	0.04604	0.02404	0.22263
1368.51	0.04587	0.02327	0.21936
1369.47	0.0457	0.02243	0.2161
1370.43	0.0345	0.02151	0.21283
1371.4	0.03398	0.02058	0.20957
1372.36	0.03346	0.01964	0.2063
1373.33	0.03294	0.01869	0.20303
1374.29	0.03241	0.01773	0.19977
1375.25	0.03189	0.01677	0.1965
1376.22	0.03137	0.0158	0.19324
1377.18	0.03085	0.04563	0.29019
1378.15	0.03033	0.04466	0.29102
1379.11	0.02981	0.0437	0.29185
1380.08	0.02566	0.04273	0.29268
1381.04	0.02514	0.04176	0.29351
1382	0.02462	0.04079	0.29434
1382.97	0.0241	0.03983	0.29517
1383.93	0.02357	0.03886	0.296
1384.9	0.02305	0.03789	0.29683
1385.86	0.02253	0.03693	0.29766
1386.82	0.02201	0.03596	0.29849
1387.79	0.02149	0.00342	0.24289
1388.75	0.02097	0.00448	0.24349
1389.72	0.02044	0.00549	0.24409
1390.68	0.01992	0.00645	0.24469
1391.64	0.0194	0.00742	0.24529
1392.61	0.01888	0.00838	0.24588
1393.57	0.01836	0.00935	0.24648
1394.54	0.01784	0.01031	0.24708
1395.5	0.01734	0.01128	0.24768
1396.46	0.01684	0.01224	0.24828
1397.43	0.01634	0.03657	0.1271
1398.39	0.01586	0.03663	0.12472
1399.36	0.01537	0.03669	0.12233
1400.32	0.01489	0.03675	0.11995
1401.29	0.0144	0.03682	0.11757
1402.25	0.01391	0.03688	0.11519
1403.21	0.01343	0.03694	0.11281
1404.18	0.01295	0.037	0.11043
1405.14	0.01247	0.03707	0.10805
1406.11	0.012	0.03713	0.10567
1407.07	0.01154	0.07549	0.07641
1408.03	0.01108	0.07365	0.07578
1409	0.01062	0.0718	0.07515
1409.96	0.01015	0.06995	0.07452
1410.93	0.0133	0.06811	0.07389
1411.89	0.01283	0.06626	0.07326
1412.86	0.01235	0.06441	0.07263
1413.82	0.01187	0.06257	0.072
1414.78	0.01141	0.06072	0.07137
1415.75	0.01096	0.05887	0.07075
1416.71	0.01054	0.05703	0.07004
1417.67	0.01013	0.06694	-0.00443
1418.64	0.00974	0.06749	-0.00216
1419.6	0.00935	0.06804	-8.04912e-16
1420.57	0.00896	0.06858	0.00205
1421.53	0.00856	0.06913	0.00409
1422.5	0.00817	0.06968	0.00611
1423.46	0.00778	0.07023	0.00811
1424.42	0.00741	0.07077	0.0101
1425.39	0.00706	0.07132	0.01201
1426.35	0.00674	0.07187	0.01383
1427.32	0.00644	0.10259	0.06153
1428.28	0.00615	0.10305	0.06349
1429.24	0.00584	0.10351	0.06536
1430.21	0.01639	0.10397	0.06721
1431.17	0.01606	0.10443	0.06905
1432.14	0.01572	0.10489	0.07087
1433.1	0.01538	0.10535	0.07267
1434.07	0.01506	0.10581	0.07446
1435.03	0.01478	0.10626	0.07602
1435.99	0.01452	0.10672	0.07737
1436.96	0.01429	0.07728	0.21569
1437.92	0.01408	0.0777	0.21423
1438.89	0.01387	0.07813	0.21256
1439.85	0.01366	0.07855	0.21088
1440.81	0.01706	0.07898	0.20921
1441.78	0.01683	0.0794	0.20754
1442.74	0.0166	0.07983	0.20587
1443.71	0.01637	0.08025	0.2042
1444.67	0.01615	0.08068	0.20253
1445.63	0.01595	0.0811	0.20075
1446.6	0.01577	0.08153	0.19886
1447.56	0.0156	0.11327	0.27119
1448.53	0.01544	0.1136	0.26912
1449.49	0.01529	0.11394	0.26694
1450.45	0.0153	0.11427	0.26476
1451.42	0.01549	0.1146	0.26258
1452.38	0.01568	0.11493	0.26039
1453.35	0.01586	0.11526	0.25821
1454.31	0.01607	0.11559	0.25603
1455.28	0.01628	0.11592	0.25382
1456.24	0.01649	0.11625	0.25158
1457.2	0.01669	0.19554	0.26754
1458.17	0.01688	0.1963	0.26562
1459.13	0.01705	0.19706	0.26367
1460.1	0.02443	0.19782	0.26172
1461.06	0.02425	0.19858	0.25976
1462.03	0.02406	0.19934	0.25781
1462.99	0.02387	0.2001	0.25584
1463.95	0.02369	0.20086	0.25388
1464.92	0.0235	0.20161	0.25169
1465.88	0.02331	0.20237	0.24926
1466.85	0.02313	0.27105	0.40007
1467.81	0.02294	0.27206	0.39909
1468.77	0.02275	0.27306	0.39786
1469.74	0.02257	0.27406	0.39661
1470.7	0.01901	0.27507	0.39535
1471.67	0.01917	0.27607	0.39407
1472.63	0.01934	0.27708	0.39277
1473.59	0.0195	0.27808	0.39146
1474.56	0.01965	0.27909	0.39013
1475.52	0.01981	0.28009	0.38866
1476.49	0.01996	0.2811	0.38705
1477.45	0.02011	0.35104	0.46734
1478.41	0.02026	0.35027	0.46596
1479.38	0.02041	0.3495	0.46444
1480.34	0.02043	0.34873	0.46291
1481.31	0.02022	0.34796	0.46135
1482.27	0.02002	0.34719	0.45977
1483.23	0.01981	0.34642	0.45817
1484.2	0.0196	0.34565	0.45654
1485.16	0.0194	0.34488	0.45437
1486.13	0.01919	0.34411	0.45164
1487.09	0.01899	0.01078	0.80882
1488.06	0.01878	0.00934	0.80303
1489.02	0.01856	0.0079	0.79707
1489.98	0.01832	0.00634	0.79112
1490.95	0.02928	0.00478	0.78517
1491.91	0.02936	0.0032	0.77921
1492.88	0.02942	0.0016	0.77326
1493.84	0.02947	1.15186e-15	0.76731
1494.8	0.02953	-0.00233	0.76135
1495.77	0.02958	-0.00537	0.7554
1496.73	0.02963	0.47749	0.755
1497.7	0.02968	0.47932	0.75067
1498.66	0.02972	0.4804	0.74634
1499.62	0.02976	0.48145	0.742
1500.59	0.02959	0.48247	0.73767
1501.55	0.02928	0.48345	0.73334
1502.52	0.02898	0.48439	0.72901
1503.48	0.02867	0.4853	0.72468
1504.45	0.02836	0.48617	0.72035
1505.41	0.02805	0.48661	0.71602
1506.37	0.02774	0.48662	0.71169
1507.34	0.02743	0.75516	0.77359
1508.3	0.02711	0.7518	0.76693
1509.27	0.02676	0.74803	0.76026
1510.23	0.0408	0.74424	0.7536
1511.19	0.04006	0.74044	0.74694
1512.16	0.03932	0.73661	0.74027
1513.12	0.03858	0.73278	0.73361
1514.09	0.03784	0.72892	0.72695
1515.05	0.0371	0.72485	0.72028
1516.02	0.03636	0.72056	0.71362
1516.98	0.03562	0.85468	0.54254
1517.94	0.03488	0.84551	0.53817
1518.91	0.03413	0.83634	0.53381
1519.87	0.03336	0.82717	0.52942
1520.84	0.04405	0.818	0.52502
1521.8	0.04395	0.80883	0.5206
1522.76	0.04383	0.79965	0.51616
1523.73	0.0437	0.79048	0.5117
1524.69	0.04358	0.78131	0.50704
1525.66	0.04345	0.77214	0.50217
1526.62	0.04332	0.89787	0.62481
1527.58	0.04319	0.89254	0.61796
1528.55	0.04304	0.88721	0.61092
1529.51	0.04289	0.88188	0.60387
1530.48	0.04979	0.87655	0.59681
1531.44	0.04926	0.87122	0.58974
1532.4	0.04872	0.86589	0.58267
1533.37	0.04818	0.86056	0.57559
1534.33	0.04764	0.85524	0.56851
1535.3	0.0471	0.84991	0.56128
1536.26	0.04656	0.84458	0.55391
1537.22	0.04602	0.83331	0.63779
1538.19	0.04546	0.82932	0.63161
1539.15	0.04487	0.82534	0.62544
1540.12	0.06233	0.82135	0.61926
1541.08	0.06134	0.81736	0.61308
1542.05	0.06034	0.81337	0.6069
1543.01	0.05934	0.80938	0.60073
1543.97	0.05835	0.80539	0.59455
1544.94	0.05735	0.80141	0.58837
1545.9	0.05637	0.79742	0.5822
1546.87	0.05538	0.72827	0.60413
1547.83	0.05441	0.72057	0.59559
1548.8	0.05343	0.71287	0.58705
1549.76	0.05244	0.70517	0.57852
1550.72	0.05921	0.69747	0.57
1551.69	0.05889	0.68977	0.56149
1552.65	0.05857	0.68207	0.553
1553.62	0.05824	0.67438	0.54452
1554.58	0.05791	0.66668	0.53606
1555.54	0.05758	0.65898	0.52769
1556.51	0.05724	0.59184	0.44763
1557.47	0.0569	0.58447	0.44424
1558.44	0.05655	0.5771	0.44093
1559.4	0.05618	0.56973	0.43771
1560.36	0.06652	0.56236	0.43451
1561.33	0.06578	0.55499	0.43132
1562.29	0.06503	0.54762	0.42816
1563.26	0.06429	0.54025	0.42501
1564.22	0.06356	0.53288	0.42187
1565.18	0.06284	0.52551	0.41896
1566.15	0.06214	0.51814	0.41627
1567.11	0.06146	0.43307	0.34549
1568.08	0.06079	0.42755	0.34098
1569.04	0.06013	0.42202	0.33668
1570.01	0.05583	0.41648	0.33236
1570.97	0.05517	0.41093	0.32802
1571.93	0.0545	0.40538	0.32367
1572.9	0.05383	0.39982	0.31929
1573.86	0.05316	0.39426	0.3149
1574.83	0.0525	0.38869	0.31044
1575.79	0.05184	0.38312	0.30603
1576.75	0.05119	0.37353	0.33339
1577.72	0.05054	0.36784	0.32765
1578.68	0.04989	0.36214	0.32199
1579.65	0.04922	0.35644	0.31645
1580.61	0.0558	0.35073	0.31091
1581.58	0.05511	0.34501	0.30536
1582.54	0.05442	0.33928	0.29982
1583.5	0.05373	0.33355	0.29428
1584.47	0.05303	0.32781	0.28873
1585.43	0.05234	0.32204	0.28322
1586.39	0.05165	0.32268	0.25883
1587.36	0.05096	0.31962	0.25545
1588.32	0.05025	0.31652	0.25209
1589.29	0.04952	0.3134	0.24874
1590.25	0.06336	0.31025	0.24537
1591.22	0.06294	0.30707	0.24198
1592.18	0.06251	0.30386	0.23857
1593.14	0.06207	0.30063	0.23514
1594.11	0.06164	0.29737	0.23169
1595.07	0.06123	0.294	0.22839
1596.04	0.06082	0.29071	0.22524
1597	0.06041	0.34433	0.26467
1597.96	0.06	0.33923	0.25889
1598.93	0.05958	0.33436	0.25328
1599.89	0.05915	0.32949	0.2477
1600.86	0.06564	0.32464	0.24212
1601.82	0.06483	0.31979	0.23656
1602.79	0.06402	0.31495	0.23102
1603.75	0.0632	0.31011	0.2255
1604.71	0.06239	0.30528	0.21982
1605.68	0.06157	0.3006	0.21412
1606.64	0.06076	0.37313	0.31981
1607.61	0.05994	0.368	0.31597
1608.57	0.0591	0.36303	0.3121
1609.53	0.05825	0.35822	0.30835
1610.5	0.07187	0.35341	0.30461
1611.46	0.07098	0.34861	0.30087
1612.43	0.07007	0.34382	0.29714
1613.39	0.06917	0.33904	0.29342
1614.36	0.06826	0.33427	0.28956
1615.32	0.06736	0.3297	0.28647
1616.28	0.06646	0.42182	0.38345
1617.25	0.06556	0.41899	0.38221
1618.21	0.06464	0.41637	0.38188
1619.17	0.0637	0.41393	0.38204
1620.14	0.07713	0.4115	0.38222
1621.1	0.07547	0.40907	0.3824
1622.07	0.07381	0.40664	0.38259
1623.03	0.07215	0.40422	0.38279
1624	0.07049	0.40179	0.383
1624.96	0.06885	0.40029	0.38355
1625.92	0.06722	0.39973	0.38445
1626.89	0.06561	0.47105	0.48783
1627.85	0.06402	0.47131	0.48783
1628.82	0.06243	0.47254	0.48818
1629.78	0.06083	0.47382	0.48855
1630.74	0.07037	0.47515	0.48894
1631.71	0.0691	0.47652	0.48934
1632.67	0.06784	0.47795	0.48976
1633.64	0.06658	0.47941	0.49019
1634.6	0.06532	0.48093	0.49064
1635.57	0.06406	0.48305	0.49142
1636.53	0.06281	0.55597	0.58764
1637.49	0.06155	0.55866	0.59047
1638.46	0.06028	0.56195	0.59362
1639.42	0.05899	0.56583	0.59709
1640.39	0.07217	0.56974	0.60058
1641.35	0.07084	0.57368	0.60406
1642.31	0.06951	0.57765	0.60756
1643.28	0.06817	0.58164	0.61107
1644.24	0.06686	0.58567	0.61459
1645.21	0.06557	0.59009	0.61838
1646.17	0.0643	0.59094	0.64417
1647.13	0.06304	0.65248	0.79834
1648.1	0.06178	0.65755	0.802
1649.06	0.0605	0.6628	0.80593
1650.03	0.0701	0.66806	0.8099
1650.99	0.06949	0.67333	0.8139
1651.95	0.06886	0.67861	0.81793
1652.92	0.06823	0.68389	0.822
1653.88	0.0676	0.68919	0.8261
1654.85	0.06698	0.69465	0.83067
1655.81	0.06637	0.70028	0.83571
1656.78	0.06578	0.75177	0.92211
1657.74	0.06519	0.76036	0.92909
1658.7	0.06463	0.76912	0.93652
1659.67	0.06406	0.77788	0.94398
1660.63	0.0635	0.78664	0.95146
1661.6	0.06293	0.79542	0.95896
1662.56	0.06237	0.8042	0.96648
1663.52	0.0618	0.81299	0.97402
1664.49	0.06125	0.82178	0.98159
1665.45	0.0607	0.83068	0.98947
1666.42	0.06016	0.80797	1.03612
1667.38	0.05964	0.81543	1.0426
1668.35	0.05911	0.823	1.04926
1669.31	0.05856	0.83067	1.05608
1670.27	0.06516	0.83835	1.06291
1671.24	0.06424	0.84603	1.06974
1672.2	0.06332	0.85371	1.07658
1673.17	0.06239	0.8614	1.08343
1674.13	0.06149	0.86909	1.09027
1675.09	0.06062	0.87685	1.09724
1676.06	0.05977	0.88467	1.10432
1677.02	0.05894	0.8627	1.20732
1677.99	0.05813	0.86904	1.21593
1678.95	0.05729	0.87544	1.22465
1679.91	0.05645	0.88184	1.23337
1680.88	0.06677	0.88824	1.2421
1681.84	0.06623	0.89465	1.25083
1682.81	0.06568	0.90105	1.25956
1683.77	0.06513	0.90745	1.26829
1684.73	0.06458	0.91389	1.27708
1685.7	0.06404	0.92036	1.28593
1686.66	0.06351	0.87753	1.32214
1687.63	0.06298	0.88472	1.33085
1688.59	0.06245	0.89194	1.33962
1689.56	0.06191	0.89917	1.34839
1690.52	0.07185	0.9064	1.35716
1691.48	0.07058	0.91363	1.36593
1692.45	0.06932	0.92086	1.37471
1693.41	0.06805	0.92809	1.38349
1694.38	0.06681	0.93533	1.39226
1695.34	0.06558	0.94258	1.40108
1696.3	0.06437	0.83307	1.39605
1697.27	0.06317	0.8385	1.40248
1698.23	0.06195	0.84396	1.40896
1699.2	0.0607	0.84944	1.41547
1700.16	0.07411	0.85493	1.42201
1701.12	0.07387	0.86042	1.42857
1702.09	0.07361	0.86593	1.43516
1703.05	0.07334	0.87145	1.44176
1704.02	0.07306	0.87698	1.4484
1704.98	0.07279	0.88252	1.45511
1705.94	0.0725	0.88807	1.46191
1706.91	0.07222	0.79971	1.34936
1707.87	0.07192	0.8042	1.35623
1708.84	0.07161	0.80871	1.36313
1709.8	0.07128	0.81322	1.37003
1710.77	0.08152	0.81774	1.37694
1711.73	0.0808	0.82227	1.38385
1712.69	0.08006	0.8268	1.39076
1713.66	0.07933	0.83134	1.39767
1714.62	0.07859	0.8359	1.4046
1715.59	0.07787	0.84049	1.41155
1716.55	0.07715	0.71626	1.2625
1717.52	0.07645	0.72351	1.26957
1718.48	0.07574	0.7308	1.27666
1719.44	0.07503	0.73811	1.28377
1720.41	0.07793	0.74546	1.29091
1721.37	0.0772	0.75283	1.29807
1722.34	0.07647	0.76022	1.30525
1723.3	0.07573	0.76765	1.31245
1724.26	0.07501	0.7751	1.31968
1725.23	0.07431	0.78266	1.32699
1726.19	0.07362	0.6339	1.13298
1727.16	0.07296	0.64054	1.13914
1728.12	0.07231	0.64694	1.14538
1729.08	0.07165	0.65311	1.1517
1730.05	0.07822	0.65928	1.15802
1731.01	0.07753	0.66543	1.16433
1731.98	0.07684	0.67158	1.17065
1732.94	0.07615	0.67773	1.17697
1733.9	0.07545	0.68387	1.1833
1734.87	0.07477	0.69001	1.1898
1735.83	0.07409	0.69601	1.19649
1736.8	0.07343	0.60329	1.00633
1737.76	0.07277	0.60866	1.01415
1738.72	0.0721	0.61389	1.02218
1739.69	0.07139	0.61897	1.03022
1740.65	0.08854	0.62403	1.03827
1741.62	0.08744	0.62909	1.04634
1742.58	0.08631	0.63414	1.05442
1743.55	0.08518	0.63918	1.06252
1744.51	0.08407	0.64422	1.07079
1745.47	0.08298	0.64907	1.07884
1746.44	0.08191	0.52395	0.85896
1747.4	0.08086	0.52954	0.86726
1748.37	0.07981	0.53493	0.87522
1749.33	0.07874	0.54013	0.88283
1750.3	0.09215	0.54533	0.89044
1751.26	0.09104	0.55052	0.89804
1752.22	0.08991	0.55572	0.90563
1753.19	0.08878	0.56092	0.91322
1754.15	0.08767	0.56611	0.92079
1755.12	0.08657	0.57109	0.92802
1756.08	0.0855	0.4287	0.70659
1757.04	0.08443	0.43179	0.71199
1758.01	0.08337	0.43464	0.71704
1758.97	0.08229	0.43727	0.72173
1759.94	0.08121	0.43989	0.72641
1760.9	0.08375	0.4425	0.73107
1761.86	0.08266	0.44509	0.73572
1762.83	0.08157	0.44768	0.74035
1763.79	0.08048	0.45025	0.74496
1764.76	0.07939	0.45281	0.74956
1765.72	0.07832	0.45519	0.75383
1766.68	0.07726	0.34895	0.54977
1767.65	0.07621	0.35093	0.55438
1768.61	0.07514	0.35273	0.55867
1769.58	0.07404	0.35437	0.56264
1770.54	0.09104	0.35599	0.5666
1771.51	0.08989	0.3576	0.57056
1772.47	0.08871	0.35919	0.5745
1773.43	0.08753	0.36078	0.57843
1774.4	0.08638	0.36235	0.58235
1775.36	0.08524	0.36375	0.58601
1776.33	0.08412	0.25154	0.41481
1777.29	0.08301	0.25296	0.41711
1778.25	0.08188	0.2542	0.41913
1779.22	0.08071	0.25526	0.42088
1780.18	0.1048	0.25632	0.42262
1781.15	0.10322	0.25736	0.42434
1782.11	0.10161	0.2584	0.42604
1783.07	0.1	0.25942	0.42773
1784.04	0.09841	0.26044	0.42941
1785	0.09683	0.26129	0.43082
1785.97	0.09526	0.15678	0.26407
1786.93	0.09372	0.15763	0.26499
1787.89	0.09218	0.15831	0.26564
1788.86	0.09063	0.15883	0.26602
1789.82	0.08904	0.15935	0.2664
1790.79	0.10973	0.15985	0.26675
1791.75	0.10879	0.16035	0.26709
1792.72	0.10781	0.16084	0.26742
1793.68	0.10684	0.16133	0.26773
1794.64	0.10586	0.16181	0.26803
1795.61	0.10488	0.16218	0.26815
1796.57	0.10391	0.0948	0.16115
1797.54	0.10293	0.09539	0.16223
1798.5	0.10195	0.09588	0.16313
1799.46	0.10096	0.09627	0.16388
1800.43	0.10359	0.09665	0.16461
1801.39	0.1026	0.09703	0.16534
1802.36	0.10159	0.09741	0.16607
1803.32	0.10059	0.09778	0.16679
1804.29	0.0996	0.09815	0.1675
1805.25	0.09862	0.09845	0.1681
1806.21	0.09764	0.05554	0.09476
1807.18	0.09668	0.05623	0.09563
1808.14	0.09569	0.05686	0.09638
1809.11	0.09467	0.05742	0.09702
1810.07	0.11531	0.05798	0.09766
1811.03	0.11353	0.05855	0.09829
1812	0.11174	0.05911	0.09893
1812.96	0.10994	0.05967	0.09956
1813.93	0.10815	0.06023	0.10019
1814.89	0.10637	0.06076	0.10076
1815.85	0.10461	0.03601	0.06322
1816.82	0.10286	0.03625	0.06369
1817.78	0.10114	0.03646	0.06409
1818.75	0.09939	0.03664	0.06444
1819.71	0.0976	0.03681	0.06479
1820.67	0.12549	0.03698	0.06513
1821.64	0.12467	0.03714	0.06547
1822.6	0.1238	0.03731	0.06581
1823.57	0.12294	0.03748	0.06615
1824.53	0.12208	0.03764	0.06649
1825.49	0.12124	0.03778	0.06679
1826.46	0.1204	0.02402	0.04322
1827.42	0.11958	0.02395	0.04296
1828.39	0.11875	0.02385	0.04267
1829.35	0.11792	0.02374	0.04233
1830.32	0.11697	0.02362	0.04199
1831.28	0.11578	0.02349	0.04164
1832.24	0.11459	0.02337	0.04129
1833.21	0.1134	0.02324	0.04093
1834.17	0.11222	0.02311	0.04057
1835.14	0.11106	0.02297	0.04019
1836.1	0.10992	0.01783	0.0301
1837.07	0.10879	0.01806	0.0302
1838.03	0.1077	0.01829	0.03029
1838.99	0.10656	0.0185	0.03035
1839.96	0.10538	0.01872	0.03042
1840.92	0.13282	0.01894	0.03048
1841.88	0.13122	0.01916	0.03054
1842.85	0.12959	0.01937	0.0306
1843.81	0.12796	0.01959	0.03066
1844.78	0.12635	0.0198	0.0307
1845.74	0.12476	0.01281	0.01839
1846.71	0.12319	0.01305	0.01905
1847.67	0.12163	0.01329	0.0197
1848.63	0.12007	0.01352	0.02034
1849.6	0.11849	0.01374	0.02097
1850.56	0.1346	0.01397	0.0216
1851.53	0.13228	0.0142	0.02224
1852.49	0.12997	0.01442	0.02287
1853.45	0.12765	0.01465	0.0235
1854.42	0.12535	0.01488	0.02414
1855.38	0.12305	0.0151	0.02477
1856.35	0.12076	0.0122	0.0186
1857.31	0.11848	0.01239	0.0189
1858.28	0.11616	0.01258	0.01919
1859.24	0.1138	0.01276	0.01947
1860.2	0.14784	0.01295	0.01975
1861.17	0.14642	0.01313	0.02004
1862.13	0.14496	0.01332	0.02032
1863.1	0.14349	0.0135	0.0206
1864.06	0.14204	0.01369	0.02088
1865.02	0.14059	0.01386	0.02115
1865.99	0.13916	0.00573	0.00632
1866.95	0.13774	0.00571	0.00665
1867.92	0.13632	0.00567	0.00697
1868.88	0.13489	0.00562	0.00727
1869.85	0.13344	0.00557	0.00757
1870.81	0.14587	0.00552	0.00786
1871.77	0.14369	0.00547	0.00816
1872.74	0.1415	0.00542	0.00846
1873.7	0.13932	0.00537	0.00876
1874.66	0.13716	0.00531	0.00905
1875.63	0.13503	-0.000593584	-0.000391061
1876.59	0.13292	-0.000292971	-0.000189079
1877.56	0.13085	-1.49186e-16	-2.67213e-15
1878.52	0.12876	0.000285892	0.000176078
1879.49	0.12664	0.000571783	0.000352155
1880.45	0.15017	0.000857675	0.000528233
1881.41	0.14868	0.00114	0.000704311
1882.38	0.14714	0.00143	0.000880388
1883.34	0.14561	0.00172	0.00106
1884.31	0.14409	0.002	0.00123
1885.27	0.14259	0.00229	0.00141
1886.23	0.14111	0.01082	0.00688
1887.2	0.13965	0.01085	0.00713
1888.16	0.13818	0.01087	0.00738
1889.13	0.13669	0.0109	0.00763
1890.09	0.14974	0.01093	0.00789
1891.06	0.1489	0.01096	0.00814
1892.02	0.14803	0.01099	0.00839
1892.98	0.14715	0.01102	0.00865
1893.95	0.14627	0.01105	0.0089
1894.91	0.14538	0.01108	0.00915
1895.88	0.14449	0.01086	0.01158
1896.84	0.1436	0.01085	0.01171
1897.8	0.14271	0.01084	0.01184
1898.77	0.14177	0.01084	0.01197
1899.73	0.14079	0.01083	0.0121
1900.7	0.16799	0.01082	0.01223
1901.66	0.16588	0.01081	0.01236
1902.62	0.16372	0.01081	0.01249
1903.59	0.16156	0.0108	0.01263
1904.55	0.15943	0.01079	0.01276
1905.52	0.15732	0.01646	0.01828
1906.48	0.15524	0.01619	0.01836
1907.44	0.15318	0.01592	0.01843
1908.41	0.1511	0.01565	0.01851
1909.37	0.14895	0.01538	0.01859
1910.34	0.18685	0.01511	0.01866
1911.3	0.18528	0.01484	0.01874
1912.27	0.18366	0.01456	0.01882
1913.23	0.18203	0.01429	0.01889
1914.19	0.18043	0.01402	0.01897
1915.16	0.17886	0.01375	0.01905
1916.12	0.17732	0.01297	0.01259
1917.09	0.17581	0.01292	0.0125
1918.05	0.17431	0.01288	0.01241
1919.01	0.17281	0.01283	0.01232
1919.98	0.17129	0.01278	0.01223
1920.94	0.17339	0.01273	0.01214
1921.91	0.17185	0.01268	0.01205
1922.87	0.1703	0.01264	0.01196
1923.84	0.16875	0.01259	0.01188
1924.8	0.16723	0.01254	0.01179
1925.76	0.16572	0.00342	0.00825
1926.73	0.16425	0.00373	0.00815
1927.69	0.1628	0.00405	0.00805
1928.66	0.16132	0.00436	0.00795
1929.62	0.15977	0.00467	0.00784
1930.58	0.20143	0.00498	0.00774
1931.55	0.19941	0.00529	0.00764
1932.51	0.19733	0.00561	0.00754
1933.48	0.19532	0.00592	0.00744
1934.44	0.19338	0.00623	0.00734
1935.4	0.19151	0.00654	0.00724
1936.37	0.18971
1937.33	0.18799
1938.3	0.18628
1939.26	0.18458
1940.22	0.2192
1941.19	0.21786
1942.15	0.21653
1943.12	0.21521
1944.08	0.21394
1945.05	0.2127
1946.01	0.21151
1946.97	0.21036
1947.94	0.20923
1948.9	0.20811
1949.87	0.20699
1950.83	0.22761
1951.79	0.2265
1952.76	0.22539
1953.72	0.22435
1954.69	0.2234
1955.65	0.22256
1956.62	0.22181
1957.58	0.22117
1958.54	0.22057
1959.51	0.21997
1960.47	0.26252
1961.43	0.26124
1962.4	0.25996
1963.36	0.25873
1964.33	0.25755
1965.29	0.25642
1966.26	0.25533
1967.22	0.2543
1968.18	0.25327
1969.15	0.25226
1970.11	0.27291
1971.08	0.27122
1972.04	0.26954
1973.01	0.26787
1973.97	0.26622
1974.93	0.26465
1975.9	0.26314
1976.86	0.2617
1977.83	0.26033
1978.79	0.259
1979.75	0.25767
1980.72	0.30422
1981.68	0.30395
1982.65	0.30367
1983.61	0.30344
1984.57	0.30327
1985.54	0.30315
1986.5	0.3031
1987.47	0.30309
1988.43	0.30309
1989.39	0.30309
1990.36	0.33971
1991.32	0.34075
1992.29	0.3418
1993.25	0.34285
1994.21	0.34397
1995.18	0.34515
1996.14	0.34641
1997.11	0.34774
1998.07	0.34912
1999.04	0.35051
2000	0.37365
