# Supplementary material
Source: Royal Society of Chemistry journal article supplement (doi:10.1039/d5nr04812e)
Supplement: d5nr04812e5.xlsx [file d5nr04812e5.xlsx]

## Sheet: Hoja1
	GO											rGO
BE_C1s	C-C (284.8 eV)_1_C1s	C-O (286.6 eV)_2_C1s	C=O (288.7 eV)_3_C1s		BO8:V249E_O1s	C=O_1_O1s	C-O-C_2_O1s	C-OH_4_O1s			BE_C1s	C-C (284.86 eV)_1_C1s	C-O (286.7 eV)_2_C1s	C=O (288.6 eV)_3_C1s		BE_O1s	C=O_1_O1s	C-O-C_2_O1s	C-OH_4_O1s
299.218	1419.81	1419.81	1419.81		546.218	4032.99	4033.41	4032.98			299.682	1075.45	1075.68	1075.63		546.682	3097.56	3097.76	3097.69
299.118	1465.01	1465.01	1465.01		546.118	4028.16	4028.59	4028.16			299.582	1068.66	1068.9	1068.84		546.582	3118.31	3118.51	3118.44
299.018	1419.97	1419.97	1419.97		546.018	4011.77	4012.21	4011.76			299.482	1040.18	1040.42	1040.37		546.482	3137.36	3137.57	3137.49
298.918	1389.58	1389.58	1389.58		545.918	3969.67	3970.12	3969.67			299.382	1042.31	1042.55	1042.51		546.382	3114.33	3114.54	3114.47
298.818	1426.13	1426.13	1426.13		545.818	3995.76	3996.21	3995.75			299.282	1017.89	1018.14	1018.09		546.282	3095.37	3095.59	3095.51
298.718	1371.91	1371.91	1371.91		545.718	3914.07	3914.54	3914.07			299.182	1008.2	1008.46	1008.41		546.182	3142.19	3142.41	3142.34
298.618	1392.83	1392.83	1392.83		545.618	3904.22	3904.7	3904.22			299.082	1018.55	1018.82	1018.77		546.082	3068.17	3068.39	3068.31
298.518	1358.95	1358.95	1358.95		545.518	3883.13	3883.62	3883.13			298.982	988.185	988.461	988.411		545.982	3052.39	3052.62	3052.55
298.418	1354.39	1354.39	1354.39		545.418	3871.11	3871.62	3871.11			298.882	1004.68	1004.96	1004.91		545.882	3088.17	3088.4	3088.32
298.318	1344.86	1344.86	1344.86		545.318	3798.43	3798.96	3798.44			298.782	999.264	999.555	999.504		545.782	3082.22	3082.46	3082.38
298.218	1316.68	1316.68	1316.68		545.218	3885.91	3886.44	3885.91			298.682	981.731	982.03	981.978		545.682	3044.87	3045.12	3045.04
298.118	1359.18	1359.18	1359.18		545.118	3774.6	3775.14	3774.6			298.582	976.025	976.33	976.284		545.582	3053.4	3053.66	3053.58
298.018	1323.83	1323.83	1323.83		545.018	3838.65	3839.21	3838.66			298.482	979.712	980.024	979.986		545.482	3048.76	3049.02	3048.93
297.918	1260.22	1260.22	1260.22		544.918	3835.6	3836.17	3835.61			298.382	954.806	955.128	955.094		545.382	3012.53	3012.79	3012.71
297.818	1291.65	1291.65	1291.65		544.818	3821	3821.58	3821.01			298.282	964.7	965.033	965.002		545.282	2991.05	2991.33	2991.24
297.718	1279.21	1279.21	1279.22		544.718	3764.68	3765.29	3764.7			298.182	941.369	941.713	941.685		545.182	2973.85	2974.13	2974.05
297.618	1280.3	1280.3	1280.3		544.618	3703.25	3703.88	3703.27			298.082	944.125	944.481	944.456		545.082	2942.36	2942.64	2942.55
297.518	1271.32	1271.32	1271.32		544.518	3727.22	3727.86	3727.24			297.982	975.306	975.673	975.632		544.982	2934.59	2934.89	2934.8
297.418	1260.59	1260.59	1260.59		544.418	3708.88	3709.54	3708.9			297.882	977.869	978.247	978.21		544.882	2988.12	2988.42	2988.33
297.318	1245.78	1245.78	1245.78		544.318	3740.63	3741.32	3740.66			297.782	946.977	947.365	947.331		544.782	2998.24	2998.55	2998.46
297.218	1237.22	1237.22	1237.23		544.218	3739.42	3740.12	3739.45			297.682	951.929	952.326	952.298		544.682	2944.63	2944.95	2944.85
297.118	1240.5	1240.5	1240.5		544.118	3722.32	3723.03	3722.35			297.582	937.88	938.288	938.266		544.582	2959.68	2960	2959.9
297.018	1255.02	1255.02	1255.02		544.018	3689.18	3689.92	3689.22			297.482	928.488	928.905	928.891		544.482	2876.74	2877.07	2876.98
296.918	1220.36	1220.36	1220.36		543.918	3708.88	3709.63	3708.92			297.382	959.14	959.571	959.561		544.382	2862.48	2862.83	2862.73
296.818	1206.96	1206.96	1206.96		543.818	3688.53	3689.3	3688.57			297.282	895.735	896.184	896.176		544.282	2886.31	2886.66	2886.56
296.718	1222.2	1222.2	1222.2		543.718	3610.32	3611.13	3610.37			297.182	917.762	918.229	918.223		544.182	2896.22	2896.58	2896.48
296.618	1235.41	1235.41	1235.41		543.618	3591.81	3592.64	3591.85			297.082	914.297	914.78	914.779		544.082	2827.88	2828.25	2828.15
296.518	1209.7	1209.7	1209.7		543.518	3632.67	3633.52	3632.72			296.982	914.419	914.918	914.923		543.982	2848.46	2848.84	2848.73
296.418	1192.56	1192.56	1192.56		543.418	3608.92	3609.8	3608.98			296.882	875.311	875.825	875.837		543.882	2827.3	2827.69	2827.58
296.318	1186.06	1186.06	1186.06		543.318	3640.01	3640.92	3640.08			296.782	845.339	845.87	845.891		543.782	2915.94	2916.34	2916.23
296.218	1207.23	1207.23	1207.24		543.218	3592.1	3593.03	3592.17			296.682	889.355	889.902	889.934		543.682	2873.83	2874.25	2874.14
296.118	1249.82	1249.82	1249.82		543.118	3606.73	3607.69	3606.81			296.582	880.703	881.265	881.311		543.582	2917.07	2917.5	2917.39
296.018	1209.44	1209.44	1209.44		543.018	3572.01	3572.99	3572.1			296.482	874.613	875.191	875.251		543.482	2824.56	2825	2824.89
295.918	1185.93	1185.93	1185.93		542.918	3601.66	3602.66	3601.74			296.382	883.325	883.921	883.995		543.382	2869.14	2869.6	2869.48
295.818	1192.66	1192.66	1192.66		542.818	3569.9	3570.95	3569.99			296.282	906.506	907.129	907.209		543.282	2796.73	2797.2	2797.08
295.718	1139.45	1139.46	1139.46		542.718	3575.11	3576.2	3575.21			296.182	900.538	901.187	901.276		543.182	2834.64	2835.12	2835.01
295.618	1172.27	1172.27	1172.27		542.618	3457.25	3458.37	3457.36			296.082	886.407	887.082	887.183		543.082	2803.23	2803.72	2803.61
295.518	1178.88	1178.88	1178.88		542.518	3524.7	3525.87	3524.82			295.982	871.039	871.74	871.855		542.982	2768.82	2769.33	2769.21
295.418	1143.55	1143.55	1143.55		542.418	3521.07	3522.28	3521.2			295.882	871.933	872.66	872.793		542.882	2783.04	2783.56	2783.43
295.318	1128.27	1128.27	1128.27		542.318	3494.11	3495.35	3494.25			295.782	885.777	886.531	886.684		542.782	2762.83	2763.37	2763.25
295.218	1145.79	1145.79	1145.79		542.218	3489.35	3490.64	3489.51			295.682	853.434	854.214	854.392		542.682	2746.46	2747.02	2746.89
295.118	1139.63	1139.63	1139.63		542.118	3425.3	3426.62	3425.46			295.582	865.47	866.271	866.478		542.582	2719.42	2720	2719.88
295.018	1181.43	1181.43	1181.43		542.018	3398.29	3399.64	3398.45			295.482	847.606	848.429	848.669		542.482	2713.54	2714.14	2714.01
294.918	1128.26	1128.26	1128.26		541.918	3450.3	3451.7	3450.48			295.382	797.435	798.283	798.558		542.382	2744.96	2745.57	2745.45
294.818	1124.43	1124.43	1124.43		541.818	3508.13	3509.59	3508.33			295.282	831.883	832.777	833.071		542.282	2651.87	2652.5	2652.38
294.718	1121.33	1121.33	1121.33		541.718	3509.23	3510.76	3509.44			295.182	837.825	838.765	839.082		542.182	2740.89	2741.54	2741.42
294.618	1097.63	1097.63	1097.63		541.618	3493.52	3495.1	3493.75			295.082	827.623	828.608	828.956		542.082	2697.02	2697.69	2697.57
294.518	1104.2	1104.21	1104.21		541.518	3521.18	3522.83	3521.43			294.982	818.347	819.377	819.761		541.982	2620.13	2620.82	2620.69
294.418	1083.64	1083.64	1083.64		541.418	3471.55	3473.26	3471.82			294.882	803.749	804.821	805.248		541.882	2686.94	2687.67	2687.52
294.318	1079.53	1079.53	1079.53		541.318	3458.57	3460.35	3458.86			294.782	825.472	826.583	827.061		541.782	2740.81	2741.56	2741.42
294.218	1112.88	1112.88	1112.88		541.218	3459.67	3461.5	3459.97			294.682	771.188	772.34	772.876		541.682	2723.39	2724.17	2724.03
294.118	1132.54	1132.54	1132.54		541.118	3502.93	3504.81	3503.24			294.582	796.23	797.421	798.025		541.582	2719.02	2719.83	2719.7
294.018	1114.14	1114.14	1114.14		541.018	3471.1	3473.03	3471.43			294.482	783.334	784.565	785.246		541.482	2661.09	2661.93	2661.8
293.918	1115.3	1115.3	1115.3		540.918	3392.53	3394.56	3392.9			294.382	804.531	805.802	806.572		541.382	2653.5	2654.35	2654.24
293.818	1089.21	1089.21	1089.21		540.818	3382.07	3384.19	3382.47			294.282	819.785	821.134	821.966		541.282	2684.03	2684.91	2684.8
293.718	1125.48	1125.48	1125.49		540.718	3384.6	3386.82	3385.03			294.182	791.386	792.815	793.716		541.182	2688.84	2689.75	2689.64
293.618	1115.51	1115.51	1115.52		540.618	3403.64	3405.96	3404.1			294.082	791.848	793.353	794.337		541.082	2694.52	2695.47	2695.35
293.518	1091.21	1091.21	1091.23		540.518	3413.8	3416.22	3414.29			293.982	833.667	835.247	836.331		540.982	2645.67	2646.66	2646.52
293.418	1143.87	1143.87	1143.89		540.418	3389.44	3391.97	3389.97			293.882	799.904	801.56	802.761		540.882	2732.85	2733.89	2733.74
293.318	1111.03	1111.03	1111.07		540.318	3407.23	3409.86	3407.79			293.782	850.973	852.627	854.042		540.782	2701.94	2703.02	2702.89
293.218	1122.88	1122.88	1122.93		540.218	3420.35	3423.08	3420.95			293.682	804.097	805.833	807.401		540.682	2672.07	2673.2	2673.08
293.118	1144.37	1144.37	1144.45		540.118	3454.12	3456.94	3454.78			293.582	804.071	805.894	807.635		540.582	2685.43	2686.59	2686.49
293.018	1133.9	1133.9	1134.03		540.018	3444.4	3447.3	3445.12			293.482	804.031	805.949	807.882		540.482	2671.74	2672.95	2672.87
292.918	1131.65	1131.65	1131.84		539.918	3452.44	3455.51	3453.21			293.382	804.039	806.048	808.198		540.382	2714.73	2715.98	2715.86
292.818	1134.63	1134.63	1134.91		539.818	3492.67	3495.93	3493.51			293.282	804.083	806.189	808.585		540.282	2646.41	2647.69	2647.59
292.718	1173.36	1173.36	1173.75		539.718	3466.1	3469.53	3466.92			293.182	804.125	806.337	809.01		540.182	2635.45	2636.8	2636.69
292.618	1171.99	1171.99	1172.56		539.618	3466	3469.61	3466.89			293.082	804.127	806.455	809.443		540.082	2666.26	2667.68	2667.56
292.518	1198.99	1198.99	1199.8		539.518	3364.94	3368.56	3365.9			292.982	804.171	806.625	809.972		539.982	2712.16	2713.65	2713.53
292.418	1163.44	1163.44	1164.57		539.418	3324.97	3328.77	3326.02			292.882	804.199	806.79	810.547		539.882	2652.91	2654.47	2654.36
292.318	1172.42	1172.43	1174.02		539.318	3388.86	3392.86	3390			292.782	804.203	806.943	811.173		539.782	2671.75	2673.38	2673.28
292.218	1172.42	1172.43	1174.64		539.218	3463.67	3467.88	3464.91			292.682	804.253	807.147	811.921		539.682	2642.57	2644.27	2644.18
292.118	1172.35	1172.36	1175.41		539.118	3472.98	3477.4	3474.32			292.582	804.281	807.332	812.737		539.582	2642.12	2643.89	2643.83
292.018	1172.21	1172.22	1176.4		539.018	3423.69	3428.31	3425.12			292.482	804.293	807.516	813.656		539.482	2667.39	2669.22	2669.19
291.918	1172.16	1172.17	1177.85		538.918	3412.71	3417.55	3414.24			292.382	804.29	807.701	814.702		539.382	2592.48	2594.37	2594.38
291.818	1172.07	1172.09	1179.76		538.818	3424.94	3430.03	3426.59			292.282	804.274	807.892	815.904		539.282	2658.62	2660.62	2660.62
291.718	1171.98	1172.01	1182.29		538.718	3425	3430.36	3426.79			292.182	804.223	808.068	817.271		539.182	2669.59	2671.71	2671.71
291.618	1171.81	1171.85	1185.55		538.618	3424.97	3430.71	3427			292.082	804.199	808.293	818.906		539.082	2672.62	2674.87	2674.88
291.518	1171.61	1171.68	1189.78		538.518	3424.95	3431.01	3427.16			291.982	804.127	808.493	820.78		538.982	2662.9	2665.27	2665.3
291.418	1171.29	1171.39	1195.14		538.418	3425	3431.41	3427.41			291.882	804.083	808.718	822.996		538.882	2669.5	2671.89	2672.05
291.318	1171.02	1171.18	1202.12		538.318	3425.07	3431.84	3427.69			291.782	804.11	809.041	825.701		538.782	2669.5	2672.02	2672.23
291.218	1170.77	1171	1211.02		538.218	3425.14	3432.32	3428			291.682	804.077	809.336	828.843		538.682	2669.4	2672.06	2672.31
291.118	1170.46	1170.8	1222.2		538.118	3425.06	3432.67	3428.19			291.582	804.031	809.654	832.569		538.582	2669.41	2672.2	2672.51
291.018	1170.08	1170.57	1236.11		538.018	3424.98	3433.06	3428.41			291.482	803.898	809.926	836.924		538.482	2669.34	2672.27	2672.64
290.918	1169.67	1170.38	1253.34		537.918	3424.93	3433.52	3428.69			291.382	803.791	810.267	842.155		538.382	2669.27	2672.35	2672.79
290.818	1169.25	1170.26	1274.51		537.818	3424.96	3434.1	3429.09			291.282	803.704	810.678	848.413		538.282	2669.19	2672.44	2672.97
290.718	1168.79	1170.24	1300.26		537.718	3424.98	3434.72	3429.53			291.182	803.496	810.994	855.707		538.182	2669.15	2672.59	2673.21
290.618	1168.17	1170.23	1331.15		537.618	3424.85	3435.24	3429.86			291.082	803.435	811.491	864.509		538.082	2669.06	2672.71	2673.42
290.518	1167.55	1170.45	1368.09		537.518	3424.83	3435.93	3430.37			290.982	803.359	812.042	874.907		537.982	2668.85	2672.71	2673.55
290.418	1166.81	1170.87	1411.68		537.418	3424.82	3436.7	3430.95			290.882	803.259	812.648	887.137		537.882	2668.66	2672.76	2673.74
290.318	1166.02	1171.67	1462.68		537.318	3424.58	3437.31	3431.39			290.782	803.116	813.301	901.439		537.782	2668.46	2672.82	2673.95
290.218	1165.08	1172.88	1521.59		537.218	3424.41	3438.07	3431.98			290.682	802.899	813.983	918.068		537.682	2668.28	2672.9	2674.21
290.118	1164.06	1174.75	1588.93		537.118	3424.18	3438.88	3432.64			290.582	802.757	814.856	937.443		537.582	2668.08	2672.98	2674.5
290.018	1162.97	1177.52	1664.96		537.018	3423.92	3439.75	3433.38			290.482	802.541	815.783	959.668		537.482	2667.82	2673.02	2674.78
289.918	1161.63	1181.29	1749.43		536.918	3423.57	3440.66	3434.19			290.382	802.354	816.79	984.997		537.382	2667.5	2673.06	2675.09
289.818	1160.01	1186.42	1841.74		536.818	3423.24	3441.72	3435.21			290.282	802.098	817.909	1013.65		537.282	2667.08	2673.06	2675.42
289.718	1158.23	1193.44	1940.96		536.718	3422.85	3442.88	3436.38			290.182	801.696	819.092	1045.71		537.182	2666.66	2673.07	2675.8
289.618	1156.11	1202.74	2045.28		536.618	3422.42	3444.18	3437.79			290.082	801.166	820.534	1081.44		537.082	2665.99	2672.85	2676.02
289.518	1153.8	1215.21	2152.56		536.518	3421.8	3445.49	3439.34			289.982	800.718	822.198	1120.77		536.982	2665.32	2672.68	2676.36
289.418	1151.15	1231.5	2259.72		536.418	3421.01	3446.87	3441.13			289.882	800.238	824.156	1163.63		536.882	2664.72	2672.62	2676.92
289.318	1148.21	1252.62	2363.26		536.318	3420.32	3448.64	3443.55			289.782	799.616	826.37	1209.69		536.782	2663.97	2672.48	2677.5
289.218	1144.9	1279.64	2459.06		536.218	3419.44	3450.53	3446.42			289.682	798.835	828.909	1258.61		536.682	2663.22	2672.4	2678.28
289.118	1141.23	1313.93	2542.93		536.118	3418.67	3452.92	3450.26			289.582	798.04	832.031	1310.05		536.582	2662.41	2672.33	2679.25
289.018	1137.1	1356.91	2610.58		536.018	3417.67	3455.53	3454.96			289.482	797.112	835.763	1363.3		536.482	2661.38	2672.12	2680.3
288.918	1132.69	1410.56	2658.54		535.918	3416.71	3458.72	3461.14			289.382	795.991	840.23	1417.51		536.382	2660.31	2671.97	2681.69
288.818	1128.23	1477.06	2684.16		535.818	3415.6	3462.43	3469.06			289.282	794.764	845.755	1471.89		536.282	2659.29	2671.97	2683.59
288.718	1123.51	1558.36	2685.52		535.718	3414.56	3467	3479.52			289.182	793.428	852.639	1525.44		536.182	2658.11	2671.94	2685.91
288.618	1118.56	1656.83	2662.29		535.618	3413.4	3472.43	3493.12			289.082	792.02	861.298	1577.13		536.082	2656.8	2671.93	2688.84
288.518	1113.44	1774.96	2615.53		535.518	3412.24	3479.08	3511.03			288.982	790.528	872.205	1625.82		535.982	2655.4	2671.99	2692.6
288.418	1108.29	1915.4	2547.67		535.418	3411.15	3487.33	3534.63			288.882	789.049	886.074	1670.49		535.882	2653.9	2672.15	2697.45
288.318	1103.33	2081.39	2462.16		535.318	3409.85	3497.28	3565.4			288.782	787.473	903.567	1709.92		535.782	2652.31	2672.46	2703.72
288.218	1098.29	2274.35	2362.63		535.218	3408.55	3509.69	3605.56			288.682	785.909	925.746	1743.19		535.682	2650.58	2672.9	2711.76
288.118	1093.42	2496.28	2253.47		535.118	3407.37	3525.29	3657.83			288.582	784.233	953.644	1769.27		535.582	2648.86	2673.68	2722.26
288.018	1088.64	2748.18	2138.54		535.018	3406.21	3544.87	3725			288.482	782.56	988.758	1787.5		535.482	2646.77	2674.5	2735.53
287.918	1084.25	3030.55	2021.78		534.918	3404.89	3569.36	3809.99			288.382	780.975	1032.79	1797.38		535.382	2644.79	2675.92	2752.85
287.818	1080.2	3342.26	1906.08		534.818	3403.53	3600.29	3916.68			288.282	779.304	1087.4	1798.33		535.282	2642.84	2677.98	2775.15
287.718	1077.21	3681.25	1794.25		534.718	3401.94	3639.25	4047.8			288.182	777.65	1154.74	1790.38		535.182	2640.63	2680.52	2803.3
287.618	1075.73	4043.4	1688.17		534.618	3400.41	3688.79	4206.78			288.082	776.056	1237.1	1773.68		535.082	2638.52	2684.15	2839.06
287.518	1076.29	4422.39	1588.93		534.518	3398.7	3751.41	4395.48			287.982	774.462	1336.64	1748.47		534.982	2636.28	2688.85	2883.69
287.418	1080.15	4809.9	1497.28		534.418	3397.04	3830.64	4614.56			287.882	772.908	1455.53	1715.34		534.882	2633.95	2695.03	2938.91
287.318	1088.38	5195.29	1413.37		534.318	3395.58	3930.51	4863.59			287.782	771.495	1595.77	1675.07		534.782	2631.47	2703.09	3006.36
287.218	1103.09	5566.35	1337.47		534.218	3394.07	4055.2	5138.48			287.682	770.202	1758.81	1628.48		534.682	2628.9	2713.64	3087.74
287.118	1127.19	5908.32	1269.2		534.118	3392.86	4209.93	5433.78			287.582	769.314	1945.71	1576.81		534.582	2626.17	2727.44	3184.47
287.018	1163.03	6206.73	1207.93		534.018	3391.9	4400.04	5740.83			287.482	768.708	2156.2	1520.9		534.482	2623.27	2745.46	3297.73
286.918	1214.24	6447.59	1153.18		533.918	3391.51	4630.94	6048.7			287.382	768.253	2388.86	1461.61		534.382	2620.36	2769.14	3428.21
286.818	1286.58	6618.47	1104.25		533.818	3391.89	4907.56	6344.28			287.282	768.337	2641.41	1400.22		534.282	2617.27	2800.09	3575.56
286.718	1384.45	6710.02	1060.64		533.718	3393.79	5234.56	6613.93			287.182	769.116	2909.86	1337.69		534.182	2613.8	2840.05	3738.49
286.618	1513.56	6716.31	1021.39		533.618	3397.37	5614.55	6843.14			287.082	770.96	3188.84	1275.03		534.082	2610.26	2891.93	3915.12
286.518	1684.21	6636.79	986.446		533.518	3403.79	6049.03	7018.7			286.982	774.412	3471.58	1213.1		533.982	2606.51	2958.64	4102.02
286.418	1901.82	6474.73	954.968		533.418	3413.93	6536.44	7130.53			286.882	780.026	3749.87	1152.51		533.882	2602.5	3043.34	4294.6
286.318	2174.82	6237.85	926.412		533.318	3428.99	7072.24	7170.39			286.782	789.018	4015.06	1094.07		533.782	2598.42	3150.39	4487.48
286.218	2515.97	5937.31	900.255		533.218	3450.71	7648.63	7135.62			286.682	802.92	4257.94	1038.35		533.682	2594.3	3283.5	4674.21
286.118	2930.31	5586.74	876.249		533.118	3480.59	8253.67	7027.37			286.582	823.308	4469	985.384		533.582	2590.3	3446.72	4847.89
286.018	3425.14	5200.06	853.567		533.018	3520.39	8871.53	6849.87			286.482	853.278	4640.04	935.728		533.482	2586.76	3644.3	5001.55
285.918	4010.69	4791.87	831.709		532.918	3572.44	9483.58	6613.51			286.382	896.255	4763.49	889.228		533.382	2583.42	3878.02	5127.75
285.818	4684.09	4375.8	810.245		532.818	3638.61	10068.4	6329.42			286.282	957.437	4834.2	846.315		533.282	2581.18	4150.34	5221.15
285.718	5443.06	3962.97	788.555		532.718	3721.52	10604	6011.96			286.182	1043.15	4848.49	806.696		533.182	2580.36	4460.76	5276.86
285.618	6282.11	3562.66	766.321		532.618	3823.31	11068.2	5675.55			286.082	1160.87	4805.21	770.117		533.082	2581.34	4806.03	5291.5
285.518	7180.02	3182.44	743.796		532.518	3946.02	11440.4	5334.02			285.982	1320.15	4706.13	736.795		532.982	2585.28	5181.52	5264.04
285.418	8110.57	2826.43	719.918		532.418	4090.22	11702.3	4998.83			285.882	1531.58	4554.84	706.306		532.882	2593.12	5578.32	5195.11
285.318	9037.25	2497.96	694.813		532.318	4257.32	11841.6	4680.75			285.782	1804.88	4356.72	678.076		532.782	2606.62	5985.46	5087.54
285.218	9915.65	2198.77	668.663		532.218	4446.63	11850.1	4386.88			285.682	2150.64	4120.03	652.278		532.682	2627.18	6388.81	4945.47
285.118	10696.2	1929.13	641.515		532.118	4656.54	11726	4121.52			285.582	2575.32	3852.64	627.82		532.582	2657.15	6772.82	4774.79
285.018	11320.5	1688.24	613.381		532.018	4884.82	11475.3	3887.96			285.482	3081.79	3564.45	605.091		532.482	2698.88	7120.58	4582.25
284.918	11750.8	1475.23	584.971		531.918	5126.69	11108.2	3685.34			285.382	3666.34	3263.99	583.101		532.382	2754.47	7414.94	4374.42
284.818	11950.7	1288.65	556.559		531.818	5376.84	10640.7	3512.76			285.282	4315.99	2959.76	561.363		532.282	2826.93	7641.8	4158.9
284.718	11893.1	1126.34	528.537		531.718	5628.64	10092.7	3368.08			285.182	5009.68	2659.86	539.928		532.182	2918.71	7787.47	3942.38
284.618	11593	985.907	501.253		531.618	5874.15	9485.85	3247.74			285.082	5716.72	2370.73	518.448		532.082	3031.47	7844.14	3730.2
284.518	11068.5	865.43	475.286		531.518	6104.7	8842.81	3148.48			284.982	6398.88	2097.71	496.925		531.982	3167.3	7808.72	3528.18
284.418	10352.4	763.056	451.188		531.418	6311.69	8185.68	3066.87			284.882	7013.39	1844.73	475.431		531.882	3326.5	7681.06	3339.69
284.318	9501.72	676.791	429.221		531.318	6486.82	7534.75	2999.91			284.782	7516.64	1614.06	453.842		531.782	3507.39	7468.36	3167.12
284.218	8565.22	604.616	409.444		531.218	6622.64	6907.58	2945.12			284.682	7871.31	1407.04	432.274		531.682	3707.55	7180.05	3011.88
284.118	7592.47	544.711	391.902		531.118	6712.87	6317.76	2899.97			284.582	8047.59	1224.25	411.422		531.582	3921.81	6830.14	2874.29
284.018	6628.08	495.348	376.528		531.018	6752.92	5775.14	2862.52			284.482	8030.69	1064.54	391.07		531.482	4144.25	6435.46	2754.48
283.918	5706.01	455.05	363.292		530.918	6740.17	5286	2831.21			284.382	7821.39	926.657	371.514		531.382	4366.43	6012.33	2651.43
283.818	4853.25	422.732	352.359		530.818	6674.81	4853.11	2804.7			284.282	7433.59	809.187	353.3		531.282	4578.37	5577.44	2563.38
283.718	4081.96	396.959	343.357		530.718	6559.34	4476.74	2782.36			284.182	6898.48	710.086	336.565		531.182	4770.35	5146.42	2489.19
283.618	3401.34	376.836	336.239		530.618	6397.89	4154.4	2763.17			284.082	6253.82	627.202	321.393		531.082	4931.87	4731.89	2426.68
283.518	2814.36	361.178	330.627		530.518	6196.48	3882.07	2746.46			283.982	5542.74	558.431	307.854		530.982	5053.78	4344.08	2374.5
283.418	2313.93	349.073	326.238		530.418	5962.89	3655.13	2732.05			283.882	4808.97	502.106	296.3		530.882	5129.09	3990.31	2330.92
283.318	1895.59	339.794	322.843		530.318	5705.35	3468.08	2719.45			283.782	4090.64	456.206	286.529		530.782	5152.03	3674.69	2294.52
283.218	1552.28	332.813	320.317		530.218	5432.58	3315.17	2708.4			283.682	3418.52	419.058	278.453		530.682	5121.89	3398.73	2264.25
283.118	1272.08	327.473	318.323		530.118	5153.18	3191.16	2698.77			283.582	2813.63	389.142	271.897		530.582	5038.66	3162.44	2238.87
283.018	1047.55	323.454	316.802		530.018	4875.05	3091.19	2690.41			283.482	2289.03	365.163	266.705		530.482	4907.46	2962.84	2217.41
282.918	870.43	320.467	315.664		529.918	4605.24	3011	2683.26			283.382	1847.35	345.866	262.567		530.382	4734.71	2797.02	2199.32
282.818	731.157	318.292	314.849		529.818	4349.22	2946.68	2677.02			283.282	1486.11	330.401	259.386		530.282	4529.69	2661.34	2184.07
282.718	623.536	316.634	314.183		529.718	4111.34	2895.17	2671.69			283.182	1198.36	317.995	256.985		530.182	4302.3	2551.34	2171.26
282.618	541.542	315.403	313.671		529.618	3894.36	2853.74	2667.04			283.082	973.534	307.955	255.145		530.082	4062.8	2463.2	2160.44
282.518	479.185	314.518	313.302		529.518	3699.95	2820.33	2663.01			282.982	801.35	299.775	253.73		529.982	3820.9	2392.95	2151.27
282.418	432.603	313.83	312.981		529.418	3528.64	2793.35	2659.61			282.882	671.22	293.03	252.607		529.882	3585.38	2337.28	2143.61
282.318	398.248	313.313	312.723		529.318	3379.91	2771.38	2656.73			282.782	573.68	287.405	251.687		529.782	3363.09	2293.53	2137.27
282.218	372.96	312.96	312.555		529.218	3252.57	2753.39	2654.28			282.682	501.257	282.736	250.99		529.682	3159.14	2258.75	2131.75
282.118	354.696	312.697	312.419		529.118	3145.06	2738.7	2652.36			282.582	447.246	278.715	250.348		529.582	2976.64	2231.28	2127.16
282.018	341.608	312.46	312.272		529.018	3055.08	2726.39	2650.61			282.482	406.887	275.293	249.824		529.482	2817.51	2209.57	2123.36
281.918	332.232	312.259	312.132		528.918	2980.7	2716.11	2649.16			282.382	376.539	272.35	249.381		529.382	2681.24	2192.14	2120.09
281.818	325.649	312.083	311.998		528.818	2919.81	2707.6	2648.09			282.282	353.405	269.803	249.008		529.282	2567.05	2178.13	2117.31
281.718	321.124	311.988	311.932		528.718	2870.09	2700.27	2647.09			282.182	335.555	267.558	248.664		529.182	2473.02	2166.89	2115.07
281.618	318.039	311.969	311.932		528.618	2829.83	2694.04	2646.28			282.082	321.621	265.606	248.383		529.082	2396.77	2157.75	2113.21
281.518	315.919	311.919	311.895		528.518	2797.27	2688.65	2645.56			281.982	310.517	263.847	248.1		528.982	2335.8	2150.29	2111.67
281.418	314.438	311.826	311.81		528.418	2771.01	2683.95	2644.93			281.882	301.556	262.263	247.825		528.882	2287.43	2144.05	2110.32
281.318	313.495	311.813	311.802		528.318	2749.87	2679.89	2644.42			281.782	294.242	260.87	247.598		528.782	2249.42	2138.75	2109.08
281.218	312.883	311.807	311.8		528.218	2732.74	2676.27	2643.93			281.682	288.122	259.563	247.334		528.682	2219.67	2134.26	2108.01
281.118	312.465	311.784	311.78		528.118	2718.89	2673.11	2643.53			281.582	283.038	258.428	247.134		528.582	2196.69	2130.55	2107.2
281.018	304.162	303.737	303.735		528.018	2707.61	2670.31	2643.17			281.482	278.726	257.395	246.943		528.482	2178.68	2127.29	2106.42
280.918	297.095	296.831	296.83		527.918	2698.4	2667.83	2642.87			281.382	275.101	256.513	246.822		528.382	2164.72	2124.54	2105.8
280.818	298.547	298.386	298.385		527.818	2690.73	2665.53	2642.52			281.282	271.972	255.696	246.692		528.282	2153.74	2122.13	2105.24
280.718	292.981	292.884	292.883		527.718	2684.32	2663.45	2642.18			281.182	269.269	254.957	246.577		528.182	2145.01	2119.96	2104.67
280.618	292.143	292.084	292.084		527.618	2679.04	2661.66	2641.96			281.082	266.865	254.229	246.416		528.082	2138.09	2118.09	2104.22
280.518	281.326	281.291	281.291		527.518	2674.54	2659.98	2641.7			280.982	264.778	253.582	246.286		527.982	2132.51	2116.44	2103.8
280.418	284.479	284.459	284.459		527.418	2670.73	2658.49	2641.5			280.882	262.987	253.034	246.211		527.882	2128.01	2114.99	2103.45
280.318	282.051	282.039	282.039		527.318	2667.46	2657.13	2641.3			280.782	261.391	252.514	246.124		527.782	2124.29	2113.68	2103.12
280.218	283.31	283.304	283.304		527.218	2664.65	2655.9	2641.13			280.682	259.988	252.049	246.056		527.682	2121.16	2112.46	2102.76
280.118	304.316	304.312	304.312		527.118	2662.18	2654.75	2640.95			280.582	258.715	251.595	245.968		527.582	2118.56	2111.4	2102.47
280.018	291.449	291.447	291.447		527.018	2660	2653.68	2640.76			280.482	257.606	251.205	245.914		527.482	2116.36	2110.45	2102.22
279.918	297.479	297.478	297.478		526.918	2658.1	2652.71	2640.6			280.382	256.566	250.799	245.817		527.382	2114.47	2109.58	2101.97
279.818	292.291	292.29	292.29		526.818	2656.43	2651.84	2640.47			280.282	255.639	250.43	245.735		527.282	2112.86	2108.8	2101.76
279.718	270.989	270.989	270.989		526.718	2654.93	2651.01	2640.39			280.182	254.825	250.111	245.681		527.182	2111.35	2107.98	2101.44
279.618	280.877	280.877	280.877		526.618	2674.78	2671.44	2661.44			280.082	254.086	249.812	245.628		527.082	2110.07	2107.28	2101.21
279.518	283.177	283.177	283.177		526.518	2652.67	2649.83	2640.4			279.982	253.42	249.537	245.581		526.982	2108.98	2106.67	2101.02
279.418	286.746	286.746	286.746		526.418	2684.65	2682.24	2673.31			279.882	251.057	247.524	243.779		526.882	2108	2106.1	2100.82
279.318	285.27	285.27	285.27		526.318	2651.53	2649.49	2641.05			279.782	238.444	235.223	231.676		526.782	2107.16	2105.6	2100.67
279.218	299.61	299.61	299.61		526.218	2604.4	2602.68	2594.71			279.682	257.561	254.622	251.258		526.682	2085.03	2083.76	2079.15
279.118	257.227	257.227	257.227		526.118	2585.06	2583.61	2576.09			279.582	242.743	240.056	236.863		526.582	2149.66	2148.64	2144.32
279.018	260.26	260.26	260.26		526.018	2604.91	2603.71	2596.58			279.482	246.273	243.813	240.781		526.482	2127.77	2126.95	2122.9
278.918	282.309	282.309	282.309		525.918	2630.26	2629.27	2622.51			279.382	237.772	235.517	232.634		526.382	2169.34	2168.7	2164.9
278.818	262.074	262.074	262.074		525.818	2617.92	2617.11	2610.7			279.282	244.484	242.414	239.671		526.282	2088.48	2087.99	2084.42
278.718	275.411	275.411	275.411		525.718	2638.92	2638.26	2632.17			279.182	224.511	222.609	219.997		526.182	2026.97	2026.61	2023.24
278.618	246.47	246.47	246.47		525.618	2663.5	2662.99	2657.18			279.082	223.244	221.494	219.005		526.082	2099.64	2099.4	2096.22
278.518	267.195	267.195	267.195		525.518	2647.22	2646.82	2641.29			278.982	221.836	220.225	217.851		525.982	2132.84	2132.68	2129.69
278.418	280.774	280.774	280.774		525.418	2640.32	2640.03	2634.76			278.882	239.939	238.321	236.056		525.882	2096.33	2096.26	2093.43
278.318	269.261	269.261	269.26		525.318	2651.13	2650.94	2645.92			278.782	241.924	240.448	238.285		525.782	2082.16	2082.16	2079.49
278.218	278.155	278.155	278.155		525.218	2684.56	2684.45	2679.67			278.682	227.896	226.566	224.5		525.682	2150.38	2150.43	2147.95
278.118	264.362	264.362	264.361		525.118	2670.25	2670.21	2665.65			278.582	243.251	242.076	240.1		525.582	2082.57	2082.67	2080.32
278.018	257.188	257.188	257.188		525.018	2685.25	2685.27	2680.91			278.482	241.056	240.015	238.067		525.482	2153	2153.15	2150.91
277.918	261.859	261.859	261.859		524.918	2664.29	2664.53	2660.2			278.382	255.115	254.124	252.262		525.382	2101.33	2101.51	2099.37
277.818	264.907	264.907	264.906		524.818	2685.22	2685.48	2681.35			278.282	235.114	234.173	232.397		525.282	2157.47	2157.69	2155.64
277.718	269.853	269.853	269.853		524.718	2675.7	2675.98	2672.04			278.182	229.341	228.449	226.759		525.182	2152.67	2153.01	2150.97
277.618	246.603	246.603	246.603		524.618	2721.13	2721.41	2717.66			278.082	248.172	247.33	245.725		525.082	2177.84	2178.2	2176.27
277.518	263.992	263.992	263.991		524.518	2711.66	2711.92	2708.38			277.982	235.736	234.955	233.425		524.982	2113.58	2113.94	2112.12
277.418	266.045	266.045	266.045		524.418	2741.86	2742.13	2738.76			277.882	231.77	231.082	229.597		524.882	2148.09	2148.44	2146.73
277.318	284.543	284.543	284.543		524.318	2781.25	2781.57	2778.31			277.782	236.488	235.866	234.432		524.782	2205.06	2205.38	2203.78
277.218	248.465	248.465	248.464		524.218	2801.14	2801.51	2798.35			277.682	246.652	246.065	244.681		524.682	2195.47	2195.8	2194.28
277.118	278.762	278.762	278.762		524.118	2690.98	2691.37	2688.33			277.582	236.134	235.582	234.248		524.582	2240.51	2240.86	2239.39
277.018	273.75	273.75	273.75		524.018	2751.75	2752.17	2749.23			277.482	229.833	229.316	228.033		524.482	2189.75	2190.12	2188.7
276.918	256.204	256.204	256.204		523.918	2783.74	2784.16	2781.33			277.382	229.866	229.385	228.151		524.382	2246.8	2247.19	2245.81
276.818	244.725	244.725	244.725		523.818	2847.88	2848.31	2845.59			277.282	217.426	216.98	215.797		524.282	2214.53	2214.92	2213.59
276.718	254.699	254.699	254.699		523.718	2860.09	2860.51	2857.9			277.182	237.43	237.019	235.887		524.182	2234.61	2234.99	2233.73
276.618	256.962	256.962	256.962		523.618	2816.38	2816.79	2814.3			277.082	220.157	219.78	218.698		524.082	2255.08	2255.41	2254.21
276.518	270.42	270.42	270.42		523.518	2805.43	2805.81	2803.44			276.982	224.369	223.995	222.962		523.982	2256.66	2256.99	2255.85
276.418	253.347	253.347	253.347		523.418	2865.84	2866.22	2863.94			276.882	231.461	231.112	230.107		523.882	2273.63	2273.95	2272.88
276.318	259.701	259.701	259.701		523.318	2813.87	2814.28	2812.06			276.782	240.104	239.781	238.803		523.782	2284.01	2284.35	2283.32
276.218	249.662	249.662	249.662		523.218	2846.63	2846.98	2844.82			276.682	229.99	229.692	228.74		523.682	2293.49	2293.83	2292.84
					523.118	2861.87	2862.23	2860.14								523.582	2336.36	2336.7	2335.73
					523.018	2811.6	2811.98	2809.96								523.482	2321.1	2321.43	2320.5
					522.918	2834.03	2834.42	2832.47								523.382	2350.31	2350.64	2349.73
					522.818	2770.36	2770.77	2768.88								523.282	2362.71	2363.03	2362.16
					522.718	2805.06	2805.46	2803.65								523.182	2381.06	2381.37	2380.54
					522.618	2758.95	2759.32	2757.58								523.082	2321.74	2322.05	2321.26
					522.518	2735.71	2736.05	2734.39								522.982	2334.5	2334.8	2334.05
					522.418	2765.99	2766.33	2764.71								522.882	2339.15	2339.45	2338.73
					522.318	2782.25	2782.6	2781.03								522.782	2335.47	2335.77	2335.07
					522.218	2750.96	2751.31	2749.78								522.682	2310.89	2311.19	2310.51
					522.118	2755.62	2755.97	2754.48								522.582	2290.4	2290.69	2290.03
					522.018	2726.87	2727.22	2725.77								522.482	2268.06	2268.35	2267.71
					521.918	2691.91	2692.27	2690.87								522.382	2228.13	2228.41	2227.79
					521.818	2650.16	2650.52	2649.17								522.282	2230.65	2230.92	2230.32
					521.718	2699.37	2699.73	2698.42								522.182	2201.91	2202.18	2201.6
					521.618	2680.81	2681.15	2679.88								522.082	2203.01	2203.28	2202.73
					521.518	2714.89	2715.21	2713.99								521.982	2199.41	2199.67	2199.15
					521.418	2648.99	2649.31	2648.12								521.882	2195.02	2195.28	2194.77
					521.318	2648.09	2648.4	2647.24								521.782	2171.87	2172.13	2171.63
					521.218	2630.29	2630.61	2629.47								521.682	2133.63	2133.88	2133.4
